# Supplementary material for: Rapid synthesis of azepinoindole derivatives from tryptamine sulfonamides and bromoallyl sulfones via an acid-mediated cyclization and rearrangement
Source: Royal Society of Chemistry journal article supplement (doi:10.1039/d0cc06991d), 2020-12-14

Supporting information for:

## **Rapid synthesis of azepinoindole derivatives from tryptamine sulfonamides and bromoallyl sulfones via an acid-mediated cyclization and rearrangement**

Ravikumar Gurram,<sup>a</sup> Jagadeesh Babu Nanubolu,<sup>b,c</sup> Rajeev S. Menon<sup>d\*</sup>

<sup>a</sup>Department of Organic Synthesis & process Chemistry, CSIR-Indian Institute of Chemical Technology, Tarnaka, Hyderabad 500007, India

<sup>b</sup>Analytical Department, CSIR-Indian Institute of Chemical Technology, Tarnaka, Hyderabad 500007, India

<sup>c</sup>Academy of Scientific and Innovative Research (AcSIR), New Delhi 110001, India.

<sup>d</sup>Department of Chemistry, Central University of Haryana, Mahendergarh, Haryana 123029, India.

Email: [rajeevmenon@cuh.ac.in](mailto:rajeevmenon@cuh.ac.in)

| <b>Contents</b>                                                                                                  | <b>Page No.</b> |
|------------------------------------------------------------------------------------------------------------------|-----------------|
| General Information                                                                                              | 2               |
| General procedure for the preparation of N-sulfonyl enamines <b>4</b>                                            | 2               |
| Spectroscopic data for N-sulfonyl enamines <b>4a-m</b>                                                           | 3               |
| General procedure for the <i>p</i> -TsOH-mediated cyclisation of N-sulfonyl enamines <b>4a-m</b>                 | 10              |
| Spectroscopic data for tetrahydroazepinoindoles <b>5a-l</b> and the tetrahydro- $\beta$ -carboline <b>1</b>      | 10              |
| Procedure for the conversion of tetrahydro- $\beta$ -carboline <b>1</b> to the tetrahydroazepinoindole <b>5m</b> | 18              |
| Single crystal X-ray analysis of <b>5e</b>                                                                       | 20              |
| Single crystal X-ray analysis of <b>1</b>                                                                        | 22              |
| Data collection and Structure solution details                                                                   | 24              |
| References                                                                                                       | 24              |
| <sup>1</sup> H and <sup>13</sup> C NMR spectra of new compounds                                                  | 25              |

## 1. General Information

All  $^1\text{H}$  NMR (400 MHz) and  $^{13}\text{C}$  NMR (100 MHz) spectra were recorded in  $\text{CDCl}_3$  solvent at ambient temperature, chemical shift  $\delta$  are given in ppm on a scale downfield from TMS, and the coupling constant  $J$  are in Hz. The signal patterns are indicated as follows: s, singlet; d, doublet; t, triplet; dd, doublet of doublet; m, multiplet. FTIR spectra were recorded as neat. Melting points were recorded on an electrothermal apparatus and are uncorrected. All the reagents and solvents were used without further purification unless specified otherwise. Technical grade ethyl acetate and petroleum ether used for column chromatography were distilled prior to use. Column chromatography was carried out using silica gel (60-120 mesh and 100-200 mesh) packed in glass columns. All reactions were performed in oven-dried glassware with magnetic stirring. TLC analysis was performed on commercially prepared 60 F<sub>254</sub> silica gel plates. Visualization of spots on TLC plate was accomplished with UV light (254 nm) and staining by  $\text{KMnO}_4$ . High-resolution mass spectra were recorded with q-TOF electrospray mass spectrometer. All purchased chemicals were used as received.

Bromoallyl sulfones **3a-b** were prepared from 2,3-dibromopropene and sodium arylsulfonates as reported earlier.<sup>1</sup> N-sulfonyl tryptamine derivatives **2** were prepared via the sulfonylation of corresponding amines with methanesulfonyl chloride, phenylsulfonyl chloride or p-toluenesulfonyl chloride as previously described.<sup>2</sup>

## 2. General procedure for the preparation of N-sulfonyl enamines **4**

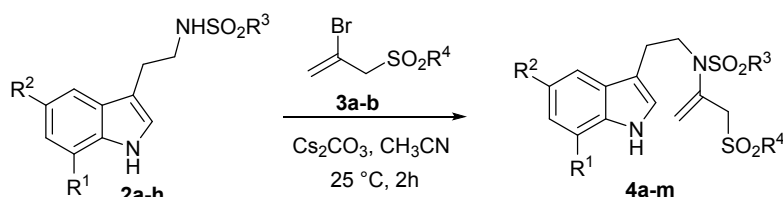

Cesium carbonate (815 mg, 2.50 mmol) was added to a solution of the N-arylsulfonamide **2** (1.00 mmol) and the bromoallyl sulfone **3a-b** (1.25 mmol) in acetonitrile (8 mL) at ambient temperature and stirred for 2 hours. The solvent was removed on a rotavapor, deionized water (20 mL) was added and the aqueous solution was extracted with ethyl acetate (3X 15 mL). The combined organic extracts were washed with brine, dried over anhydrous sodium sulfate and concentrated on a rotavapor. The residue on column chromatography on silica gel using petroleum ether-ethyl acetate as eluent afforded analytically pure samples of the products **4a-m**.

### 3. Spectroscopic data for N-sulfonyl enamines 4a-m

N-[2-(1H-indol-3-yl)ethyl]-N-[3-(phenylsulfonyl)prop-1-en-2-yl]benzenesulfonamide, **4a**

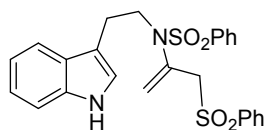

Off-white solid, 389 mg, 81%

**Melting point:** 120-122 °C.

**R<sub>f</sub>** = 0.4 (40% ethyl acetate in hexanes)

**IR (KBr) ν<sub>max</sub>:** 3408, 2934, 1631, 1450, 1343, 1158, 963, 688, 597 cm<sup>-1</sup>

**<sup>1</sup>H NMR (500 MHz, CDCl<sub>3</sub>)** δ 8.00 (brs, 1H), 7.94-7.92 (m, 2H), 7.70-7.68 (m, 2H), 7.67-7.64 (m, 1H), 7.58-7.55 (m, 4H), 7.47- 7.44 (m, 2H), 7.36 (d, *J* = 8.1 Hz, 1H), 7.21-7.18 (m, 1H), 7.14-7.11 (m, 1H), 7.02 (d, *J* = 2.1 Hz, 1H), 5.63 (s, 1H), 4.93 (s, 1H), 4.22 (s, 2H), 3.58-3.55 (m, 2H), 3.07- 3.03 (m, 2H).

**<sup>13</sup>C NMR (101 MHz, CDCl<sub>3</sub>)** δ 139.2, 136.5, 136.1, 135.6, 133.9, 133.0, 129.3, 128.82, 128.2, 127.9, 127.2, 122.2, 122.1, 120.4, 119.5, 118.7, 112.3, 111.2, 62.6, 51.6, 24.4.

**HRMS:** calcd for C<sub>25</sub>H<sub>25</sub>O<sub>4</sub>N<sub>2</sub>S<sub>2</sub> [M+H<sup>+</sup>] 481.1256; found 481.1249.

N-[2-(1H-indol-3-yl)ethyl]-N-(3-tosylprop-1-en-2-yl)benzenesulfonamide, **4b**

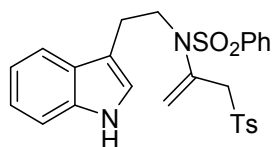

Light yellow solid, 390 mg 79%

**Melting point:** 94-96 °C.

**R<sub>f</sub>** = 0.4 (40% ethyl acetate in hexanes).

**IR (KBr) ν<sub>max</sub>:** 3404, 2927, 1595, 1451, 1343, 1157, 1015, 751, 520 cm<sup>-1</sup>.

**<sup>1</sup>H NMR (500 MHz, CDCl<sub>3</sub>)** δ 7.98 (s, 1H), 7.80 (d, *J* = 8.1 Hz, 2H), 7.70 (s, 1H), 7.57-7.55 (m, 2H), 7.47-7.43 (m, 2H), 7.36-7.33(m, 2H), 7.21-7.18 (m, 1H), 7.14-7.11 (m, 1H), 7.03 (s, 1H), 5.62 (d, *J* = 45.7 Hz, 1H), 4.92 (s, 1H), 4.19 (s, 2H), 3.57-3.54 (m, 2H), 3.05-3.02 (m, 2H), 2.41 (s, 3H).

**<sup>13</sup>C NMR (126 MHz, CDCl<sub>3</sub>)** δ 145.0, 136.5, 136.2, 136.1, 135.7, 133.0, 129.9, 128.78, 128.2, 127.8, 127.2, 122.2, 122.0, 120.5, 119.4, 118.6, 112.2, 111.2, 62.6, 51.5, 24.4, 21.6.

$^{13}\text{C}$ NMR (125 MHz,  $\text{CDCl}_3$ )  $\delta$  144.9, 136.5, 136.2, 136.1, 135.6, 133.0, 129.8, 128.7, 128.2, 127.8, 127.2, 122.1, 121.9, 120.4, 119.3, 118.5, 112.1, 111.1, 62.6, 51.4, 24.4, 21.5.

**HRMS:** calcd for  $\text{C}_{26}\text{H}_{27}\text{O}_4\text{N}_2\text{S}_2$   $[\text{M}+\text{H}^+]$  495.1412; found 495.1407.

N-[2-(1H-indol-3-yl)ethyl]-4-methyl-N-[3-(phenylsulfonyl)prop-1-en-2-yl]benzenesulfonamide, **4c**

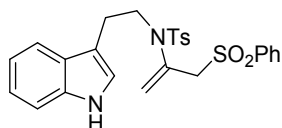

Pale yellow solid, 385 mg, 78 %

**Melting point:** 105-107 °C.

$R_f$  = 0.4 (40% ethyl acetate in hexane)

**IR (KBr)**  $\nu_{\text{max}}$ : 3404, 2923, 1595, 1451, 1343, 1123, 1015, 744, 536  $\text{cm}^{-1}$

**$^1\text{H}$  NMR (500 MHz,  $\text{CDCl}_3$ )**  $\delta$  8.01 (s, 1H), 7.94-7.92 (m, 2H), 7.66-7.63 (m, 1H), 7.58-7.55 (m, 5H), 7.35 (d,  $J$  = 8.1 Hz, 1H), 7.23 (d,  $J$  = 8.1 Hz, 2H), 7.21-7.18 (m, 1H), 7.14-7.10 (m, 1H), 7.02 (d,  $J$  = 2.1 Hz, 1H), 5.62 (s, 1H), 4.93 (d,  $J$  = 1.3 Hz, 1H), 4.23 (s, 2H), 3.54-3.51 (m, 2H), 3.05-3.01 (m, 2H), 2.39 (s, 3H).

**$^{13}\text{C}$  NMR (101 MHz,  $\text{CDCl}_3$ )**  $\delta$  144.0, 139.2, 136.1, 135.7, 133.9, 133.4, 129.4, 129.3, 128.2, 127.9, 127.2, 122.2, 122.0, 120.1, 119.4, 118.6, 112.3, 111.2, 62.6, 51.4, 24.3, 21.5.

**HRMS:** calcd for  $\text{C}_{26}\text{H}_{26}\text{O}_4\text{N}_2\text{S}_2$  Na  $[\text{M}+\text{Na}^+]$  517.1232; found 517.1220.

N-[2-(1H-indol-3-yl)ethyl]-4-methyl-N-(3-tosylprop-1-en-2-yl)benzenesulfonamide, **4d**

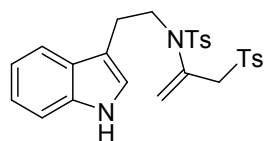

Pale yellow solid, 401 mg, 79%

**Melting point:** 100-102 °C.

$R_f$  = 0.4 (40% ethyl acetate in hexanes)

**IR (KBr)**  $\nu_{\text{max}}$ : 3351, 2925, 1595, 1454, 1310, 1083, 916, 696, 551  $\text{cm}^{-1}$ .

**$^1\text{H}$  NMR (300 MHz,  $\text{CDCl}_3$ )**  $\delta$  7.98 (s, 1H), 7.80 (d,  $J$  = 8.3 Hz, 2H), 7.58-7.54 (m, 3H), 7.37-7.33 (m, 3H), 7.24-7.12 (m, 5H), 7.02 (d,  $J$  = 2.2 Hz, 1H), 5.62 (s, 1H), 5.30 (s, 1H), 4.93 (d,  $J$  = 1.1 Hz, 1H), 4.20 (s, 2H), 3.55-3.50 (m, 2H), 3.24-2.99 (m, 2H), 2.41 (s, 3H), 2.39 (s, 3H).

**$^{13}\text{C}$  NMR (101 MHz,  $\text{CDCl}_3$ )  $\delta$**  144.9, 143.6, 139.3, 137.3, 136.2, 135.1, 130.0, 129.8, 129.7, 127.6, 127.0, 125.7, 122.7, 119.7, 118.3, 111.6, 109.0, 64.5, 60.1, 43.6, 26.1, 21.7.

**HRMS:** calcd for  $\text{C}_{27}\text{H}_{29}\text{O}_4\text{N}_2\text{S}_2$  [ $\text{M}+\text{H}^+$ ] 509.1569; found 509.1596.

N-[2-(7-methyl-1H-indol-3-yl)ethyl]-N-[3-(phenylsulfonyl)prop-1-en-2-yl]benzenesulfonamide, **4e**

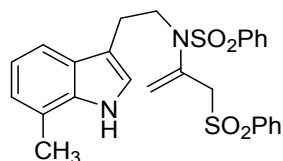

White solid, 375 mg, 76%

**Melting point:** 128-130 °C

**$R_f$**  = 0.4 (40% ethyl acetate in hexanes)

**IR (KBr)  $\nu_{\text{max}}$ :** 3360, 2857, 1968, 1623, 1309, 1164, 958, 691  $\text{cm}^{-1}$

**$^1\text{H}$  NMR (400 MHz,  $\text{CDCl}_3$ )  $\delta$**  7.89-7.87 (m, 3H), 7.68-7.64 (m, 3H), 7.58-7.51 (m, 3H), 7.46-7.42 (m, 2H), 7.19 (d,  $J$  = 6.9 Hz, 1H), 7.02-6.98 (m, 2H), 6.89 (s, 1H), 6.46 (s, 1H), 6.08 (s, 1H), 4.03 (s, 2H), 3.37-3.33 (m, 2H), 2.77-2.73 (m, 2H), 2.46 (s, 3H).

**$^{13}\text{C}$  NMR (126 MHz,  $\text{CDCl}_3$ )  $\delta$**  146.3, 139.0, 138.5, 135.7, 133.9, 132.8, 129.4, 129.2, 129.2, 128.2, 127.0, 126.1, 122.7, 121.7, 120.4, 119.8, 116.2, 112.3, 49.8, 46.8, 24.6, 16.5.

**HRMS:** calcd for  $\text{C}_{26}\text{H}_{27}\text{O}_4\text{N}_2\text{S}_2$  [ $\text{M}+\text{H}^+$ ] 495.1412; found 495.1411.

N-[2-(7-methyl-1H-indol-3-yl)ethyl]-N-(3-tosylprop-1-en-2-yl)benzenesulfonamide, **4f**

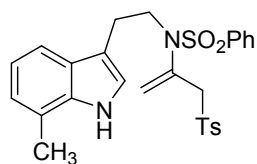

White solid, 402 mg, 79%

**Melting point:** 125-127 °C

**$R_f$**  = 0.4 (40% ethyl acetate in hexanes)

**IR (KBr)  $\nu_{\text{max}}$**  3384, 2916, 1631, 1336, 1235, 1158, 1085, 963, 559  $\text{cm}^{-1}$

**<sup>1</sup>H NMR (400 MHz, CDCl<sub>3</sub>)**  $\delta$  7.94 (s, 1H), 7.81 (d,  $J$  = 8.3 Hz, 2H), 7.70-7.67 (m, 2H), 7.57-7.54 (m, 1H), 7.46-7.39 (m, 3H), 7.34 (d,  $J$  = 8.0 Hz, 2H), 7.07-6.99 (m, 3H), 5.62 (s, 1H), 4.92 (d,  $J$  = 1.2 Hz, 1H), 4.20 (s, 2H), 3.56-3.52 (m, 2H), 3.04-3.00 (m, 2H), 2.48 (s, 3H), 2.41 (s, 3H).

**<sup>13</sup>C NMR (101 MHz, CDCl<sub>3</sub>)**  $\delta$  145.0, 136.5, 136.3, 135.7, 133.0, 130.1, 129.9, 128.8, 128.3, 127.9, 127.0, 126.8, 122.6, 121.9, 120.4, 119.7, 116.4, 112.8, 62.7, 51.5, 24.5, 21.6, 16.6.

**HRMS:** calcd for C<sub>27</sub>H<sub>29</sub>O<sub>4</sub>N<sub>2</sub>S<sub>2</sub> [M+H<sup>+</sup>] 509.1569; found 509.1568.

4-Methyl-N-[2-(7-methyl-1H-indol-3-yl)ethyl]-N-[3-(phenylsulfonyl)prop-1-en-2-yl]benzenesulfonamide, **4g**

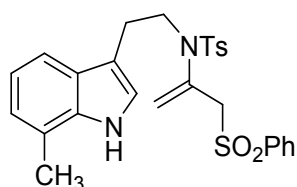

White solid, 406 mg, 80%

**Melting point:** 183-185 °C

**R<sub>f</sub>** = 0.4 (40% ethyl acetate in hexanes)

**IR (KBr)  $\nu_{\text{max}}$ :** 3455, 2920, 1492, 1338, 1131, 1084, 964, 821, 786, 752, 690, 556 cm<sup>-1</sup>

**<sup>1</sup>H NMR (400 MHz, CDCl<sub>3</sub>)**  $\delta$  7.89-7.87 (m, 3H), 7.68-7.64 (m, 1H), 7.58-7.52 (m, 4H), 7.23-7.18 (m, 3H), 7.03-6.99 (m, 2H), 6.91 (d,  $J$  = 1.9 Hz, 1H), 6.46 (s, 1H), 6.10 (s, 1H), 4.01 (s, 2H), 3.34-3.30 (m, 2H), 2.77-2.73 (m, 2H), 2.47 (s, 3H), 2.40 (s, 3H).

**<sup>13</sup>C NMR (101 MHz, CDCl<sub>3</sub>)**  $\delta$  146.4, 143.7, 138.5, 135.9, 135.7, 133.9, 129.8, 129.4, 128.2, 127.1, 126.5, 126.1, 122.7, 121.7, 120.4, 119.7, 116.2, 112.4, 49.8, 46.8, 24.6, 21.5, 16.5.

**HRMS:** calcd for C<sub>27</sub>H<sub>29</sub>O<sub>4</sub>N<sub>2</sub>S<sub>2</sub> [M+H<sup>+</sup>] 509.1569; found 509.1565

4-Methyl-N-[2-(7-methyl-1H-indol-3-yl)ethyl]-N-(3-tosylprop-1-en-2-yl)benzenesulfonamide, **4h**

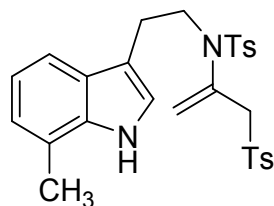

White solid, 392 mg, 75%

**Melting point:** 167-169 °C

**R<sub>f</sub>** = 0.4 (40% ethyl acetate in hexanes).

**IR (KBr)  $\nu_{\text{max}}$ :** 3353, 2934, 1595, 1492, 1337, 1160, 959, 651, 590  $\text{cm}^{-1}$ .

**$^1\text{H}$  NMR (500 MHz,  $\text{CDCl}_3$ )  $\delta$**  7.91 (s, 1H), 7.75 (d,  $J$  = 8.3 Hz, 2H), 7.55 (d,  $J$  = 8.3 Hz, 2H), 7.34 (d,  $J$  = 8.1 Hz, 2H), 7.23 (d,  $J$  = 8.1 Hz, 2H), 7.19 – 7.17 (m, 1H), 7.02 – 6.99 (m, 2H), 6.91 (d,  $J$  = 2.2 Hz, 1H), 6.43 (s, 1H), 6.07 (s, 1H), 4.02 (s, 2H), 3.33-3.30 (m, 2H), 2.75-2.72 (m, 2H), 2.47 (s, 3H), 2.42 (s, 3H), 2.40 (s, 3H).

**$^{13}\text{C}$  NMR (125 MHz,  $\text{CDCl}_3$ )  $\delta$**  146.5, 145.0, 143.7, 135.9, 135.7, 135.4, 130.0, 129.8, 128.2, 127.0, 126.4, 125.6, 122.6, 121.7, 120.4, 119.6, 116.1, 112.2, 49.7, 46.7, 24.5, 21.6, 21.4, 16.5.

**HRMS:** calcd for  $\text{C}_{28}\text{H}_{30}\text{O}_4\text{N}_2\text{S}_2\text{Na}$  [ $\text{M}+\text{Na}^+$ ] 545.1545; found 545.1538.

N-[2-(5-fluoro-1H-indol-3-yl)ethyl]-4-methyl-N-[3-(phenylsulfonyl)prop-1-en-2-yl]benzenesulfonamide, **4i**

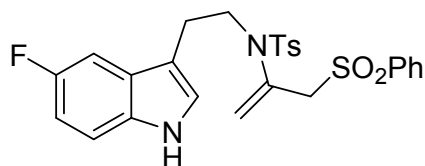

White solid, 369 mg 72%

**Melting point:** 100-102 °C

**R<sub>f</sub>** = 0.4 (40% ethyl acetate in hexanes)

**IR (KBr)  $\nu_{\text{max}}$ :** 3401, 2926, 1715, 1584, 754, 649, 526  $\text{cm}^{-1}$

**$^1\text{H}$  NMR (500 MHz,  $\text{CDCl}_3$ )  $\delta$**  8.02 (s, 1H), 7.94 (d,  $J$  = 7.5 Hz, 2H), 7.67-7.64 (m, 1H), 7.59-7.56 (m, 4H), 7.26-7.24 (m, 3H), 7.15 (dd,  $J$  = 9.5, 2.1 Hz, 1H), 7.08 (s, 1H), 6.97-6.90 (m, 1H), 5.60 (s, 1H), 4.94 (s, 1H), 4.22 (s, 2H), 3.52-3.49 (m, 2H), 3.01-2.98 (m, 2H), 2.40 (s, 4H).

**$^{13}\text{C}$  NMR (126 MHz,  $\text{CDCl}_3$ )  $\delta$**  157.7 (d,  $J$  = 234.8 Hz), 144.1, 139.3, 135.7, 133.9, 133.5, 132.6, 129.9, 129.5, 129.3, 128.2, 127.9, 127.65 (d,  $J$  = 9.5 Hz), 124.1, 120.4, 112.6 (d,  $J$  = 3.8 Hz), 111.8 (d,  $J$  = 9.6 Hz), 110.4 (d,  $J$  = 26.4 Hz), 103.5 (d,  $J$  = 23.4 Hz), 62.7, 51.3, 24.3, 21.5.

**HRMS:** calcd for  $\text{C}_{26}\text{H}_{26}\text{FO}_4\text{N}_2\text{S}_2$  [ $\text{M}+\text{H}^+$ ] 513.1318; found 513.1308.

N-[2-(5-fluoro-1H-indol-3-yl)ethyl]-4-methyl-N-(3-tosylprop-1-en-2-yl)benzenesulfonamide, **4j**

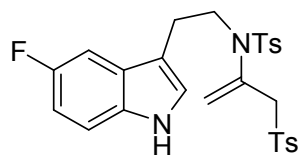

White solid, 426 mg 81%

**Melting point:** 147-149 °C

**R<sub>f</sub>** = 0.4 (40% ethyl acetate in hexanes).

**IR (KBr) ν<sub>max</sub>:** 3383, 2973, 1930, 1487, 1240, 1087, 797, 642, 560, 429 cm<sup>-1</sup>

**<sup>1</sup>H NMR (500 MHz, CDCl<sub>3</sub>) δ** 7.98 (s, 1H), 7.80 (d, *J* = 8.2 Hz, 2H), 7.59 (d, *J* = 8.2 Hz, 2H), 7.35 (d, *J* = 8.0 Hz, 2H), 7.27-7.24 (m, 3H), 7.14 (dd, *J* = 9.5, 2.4 Hz, 1H), 7.08 (d, *J* = 1.3 Hz, 1H), 6.93 (td, *J* = 9.0, 2.4 Hz, 1H), 5.59 (s, 1H), 4.94 (s, 1H), 4.19 (s, 2H), 3.52-3.49 (m, 2H), 2.99-2.96 (m, 2H), 2.42 (s, 3H), 2.40 (s, 3H).

**<sup>13</sup>C NMR (101 MHz, CDCl<sub>3</sub>) δ** 157.7 (d, *J* = 234.7 Hz), 136.3, 135.8, 133.6, 132.6, 129.9, 129.5, 128.3, 127.9, 127.7 (d, *J* = 9.5 Hz), 124.0, 120.4, 112.6 (d, *J* = 4.1 Hz), 111.8 (d, *J* = 9.6 Hz), 110.4 (d, *J* = 26.4 Hz), 103.6 (d, *J* = 23.4 Hz), 62.7, 51.2, 24.3, 21.6, 21.5.

**HRMS:** calcd for C<sub>27</sub>H<sub>28</sub>O<sub>4</sub>FN<sub>2</sub>S<sub>2</sub> [M+H<sup>+</sup>] 527.1475; found 527.1469.

N-{2-[5-(benzyloxy)-1H-indol-3-yl]ethyl}-N-[3-(phenylsulfonyl)prop-1-en-2-yl]benzenesulfonamide,  
**4k**

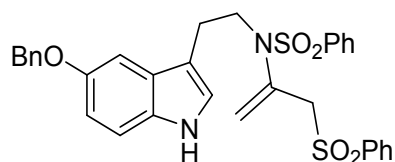

White solid, 399 mg, 68%

**Melting point:** 73-75 °C

**R<sub>f</sub>** = 0.4 (40% ethyl acetate in hexanes).

**IR (KBr) ν<sub>max</sub>:** 3449, 2912, 1931, 1449, 1310, 1254, 1141, 1082, 672, 576 cm<sup>-1</sup>

**<sup>1</sup>H NMR (400 MHz, CDCl<sub>3</sub>) δ** 7.93-7.91 (m, 2H), 7.88 (s, 1H), 7.70-7.62 (m, 4H), 7.57-7.53 (m, 4H), 7.49-7.43 (m, 5H), 7.38-7.35 (m, 2H), 7.16 (d, *J* = 2.2 Hz, 1H), 7.01 (d, *J* = 2.2 Hz, 1H), 6.94 (dd, *J* = 8.8, 2.2 Hz, 1H), 5.60 (s, 1H), 5.13 (s, 2H), 4.89 (d, *J* = 1.2 Hz, 1H), 4.20 (s, 2H), 3.57-3.53 (m, 2H), 3.05-3.01 (m, 2H),

**<sup>13</sup>C NMR (101 MHz, CDCl<sub>3</sub>)** δ 153.2, 139.2, 137.7, 136.5, 135.7, 133.9, 133.0, 131.4, 129.3, 128.8, 128.4, 128.2, 127.8, 127.7, 127.6, 123.0, 120.6, 113.1, 112.1, 111.9, 102.0, 70.8, 62.6, 51.6, 24.6.

**HRMS:** calcd for C<sub>32</sub>H<sub>31</sub>O<sub>5</sub>N<sub>2</sub>S<sub>2</sub> [M+H<sup>+</sup>] 587.1674; found 587.1653.

N-{2-[5-(benzyloxy)-1H-indol-3-yl]ethyl}-4-methyl-N-[3-(phenylsulfonyl)prop-1-en-2-yl]benzenesulfonamide, **4l**

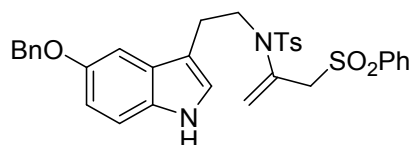

White solid, 402 mg 67%

**Melting point:** 158-160 °C

**R<sub>f</sub>** = 0.4 (40% ethyl acetate in hexanes)

**IR (KBr) ν<sub>max</sub>:** 3410, 2923, 1306, 1153, 1020, 807, 691 cm<sup>-1</sup>

**<sup>1</sup>H NMR (500 MHz, CDCl<sub>3</sub>)** δ 7.93 (d, *J* = 7.6 Hz, 2H), 7.87 (s, 1H), 7.66-7.62 (m, 1H), 7.57-7.53 (m, 4H), 7.48 (d, *J* = 7.5 Hz, 2H), 7.38-7.35 (m, 2H), 7.30 (d, *J* = 7.3 Hz, 1H), 7.26-7.22 (m, 3H), 7.15 (s, 1H), 7.01 (s, 1H), 6.94 (dd, *J* = 8.7, 2.0 Hz, 1H), 5.59 (s, 1H), 5.13 (s, 2H), 4.90 (s, 1H), 4.21 (s, 2H), 3.54-3.50 (m, 2H), 3.03-3.00 (m, 2H), 2.39 (s, 3H).

**<sup>13</sup>C NMR (101 MHz, CDCl<sub>3</sub>)** δ 153.2, 143.9, 139.3, 137.7, 135.8, 133.9, 133.5, 131.4, 129.4, 129.3, 128.4, 128.2, 127.9, 127.7, 127.6, 123.0, 120.3, 113.1, 112.2, 111.9, 102.1, 70.8, 62.7, 51.5, 24.6, 21.5.

**HRMS:** calcd for C<sub>33</sub>H<sub>33</sub>O<sub>5</sub>N<sub>2</sub>S<sub>2</sub> [M+H<sup>+</sup>] 601.1831; found 601.1818.

N-[2-(1H-indol-3-yl)ethyl]-N-(3-tosylprop-1-en-2-yl)methanesulfonamide, **4m**

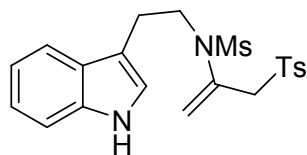

White solid, 311 mg, 72%

**Melting point:** 172-175 °C

**R<sub>f</sub>** = 0.4 (40% ethyl acetate in hexanes)

**IR (KBr) ν<sub>max</sub>:** 3367, 2920, 1595, 1313, 1287, 1146, 1086, 742, 674, 543 cm<sup>-1</sup>.

$^1\text{H}$  NMR (500 MHz,  $\text{CDCl}_3$ )  $\delta$  8.06 (s, 1H), 7.79 (d,  $J = 8.2$  Hz, 1H), 7.61 (d,  $J = 7.8$  Hz, 1H), 7.37-7.33 (m, 3H), 7.22-7.19 (m, 1H), 7.15-7.12 (m, 1H), 7.06 (d,  $J = 2.0$  Hz, 1H), 5.50 (s, 1H), 5.47 (s, 1H), 4.08 (s, 2H), 3.77–3.74 (m, 2H), 3.11–3.08 (m, 2H), 2.88 (s, 3H), 2.42 (s, 3H).

$^{13}\text{C}$  NMR (125 MHz,  $\text{CDCl}_3$ )  $\delta$  144.9, 137.1, 136.3, 129.7, 127.6, 125.7, 122.8, 119.9, 118.4, 111.5, 64.3, 59.9, 43.6, 26.4, 21.9.

HRMS: calcd for  $\text{C}_{21}\text{H}_{25}\text{O}_4\text{N}_2\text{S}_2$   $[\text{M}+\text{H}^+]$  433.1256; found 433.1252.

#### 4. General procedure for the *p*-TsOH-mediated cyclisation of N-sulfonyl enamines **4a-l**

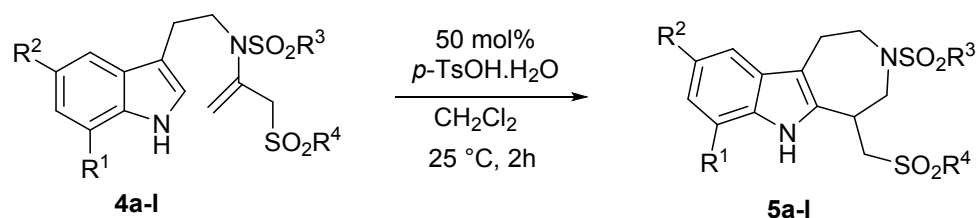

To a solution of the N-sulfonyl enamine **4a-l** (0.20 mmol) in dichloromethane (2 mL) maintained at ambient temperature *p*-TsOH.H<sub>2</sub>O (19 mg, 0.10 mmol) was added and the reaction was stirred for 2 h at 25 °C. Silica gel was then added to the reaction mixture, the solvent was evaporated on a rotavapor and the residue was chromatographed on a silica column using petroleum ether-ethyl acetate as eluent to afford analytically pure samples of the products **5a-l**.

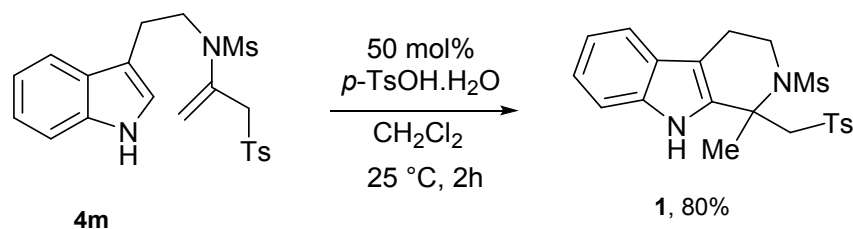

The N-mesyl derivative **4m** afforded the tetrahydro- $\beta$ -carboline product **1** (80%) when treated under identical conditions.

#### 5. Spectroscopic data for tetrahydroazepinoindoles **5a-l** and the tetrahydro- $\beta$ -carboline **1**

3-(Phenylsulfonyl)-5-[(phenylsulfonyl)methyl]-1,2,3,4,5,6-hexahydroazepino[4,5-*b*]indole, **5a**

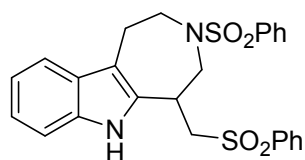

White solid, 84 mg, 87%

**Melting point:** 214-216 °C

**R<sub>f</sub>** = 0.4 (30% ethyl acetate in hexanes).

**IR (KBr) ν<sub>max</sub>:** 34047, 2932, 1617, 1446, 1339, 1144, 992, 687, 574 cm<sup>-1</sup>

**<sup>1</sup>H NMR (500 MHz, CDCl<sub>3</sub>) δ** 8.40 (s, 1H), 7.87-7.85 (m, 2H), 7.82-7.80 (m, 2H), 7.62-7.53 (m, 4H), 7.47-7.43 (m, 2H), 7.36 (d, *J* = 8.0 Hz, 1H), 7.32 (d, *J* = 8.1 Hz, 1H), 7.19-7.15 (m, 1H), 7.09-7.06 (m, 1H), 4.24 (dd, *J* = 13.8, 2.6 Hz, 1H), 4.18 (dt, *J* = 13.0, 3.3 Hz, 1H), 4.01 (dd, *J* = 14.4, 4.5 Hz, 1H), 3.89-3.86 (m, 1H), 3.47 (dd, *J* = 14.4, 6.8 Hz, 1H), 3.08 (dd, *J* = 13.8, 2.1 Hz, 1H), 3.03 (ddd, *J* = 15.9, 4.1, 2.1 Hz, 1H), 2.92-2.86 (m, 1H), 2.77-2.72 (m, 1H).

**<sup>13</sup>C NMR (101 MHz, CDCl<sub>3</sub>) δ** 139.2, 138.6, 134.9, 134.5, 133.7, 132.9, 129.3, 129.2, 128.2, 127.6, 126.9, 122.3, 119.5, 117.9, 111.5, 110.9, 58.2, 53.2, 50.9, 34.4, 25.70.

**HRMS:** calcd for C<sub>25</sub>H<sub>25</sub>O<sub>4</sub>N<sub>2</sub>S<sub>2</sub> [M+H<sup>+</sup>] 481.1256; found 481.1265.

3-(Phenylsulfonyl)-5-(tosylmethyl)-1,2,3,4,5,6-hexahydroazepino[4,5-b]indole, **5b**

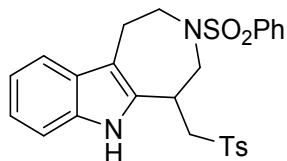

White solid, 79 mg, 80%

**Melting point:** 223-225 °C

**R<sub>f</sub>** = 0.4 (30% ethyl acetate in hexanes).

**IR (KBr) ν<sub>max</sub>:** 3373, 2930, 1598, 1454, 1337, 1282, 1140, 744, 570 cm<sup>-1</sup>.

**<sup>1</sup>H NMR (400 MHz, CDCl<sub>3</sub>) δ** 8.46 (s, 1H), 7.81 (d, *J* = 8.6 Hz, 2H), 7.73 (d, *J* = 8.3 Hz, 2H), 7.562-7.52 (m, 3H), 7.36 (d, *J* = 7.9 Hz, 1H), 7.31 (d, *J* = 8.1 Hz, 1H), 7.23 (d, *J* = 8.1 Hz, 2H), 7.16 (t, *J* = 7.1 Hz, 1H), 7.07 (t, *J* = 7.2 Hz, 1H), 4.25 – 4.16 (m, 2H), 3.97 (dd, *J* = 14.4, 4.5 Hz, 1H), 3.86-3.85 (m, 1H), 3.45 (dd, *J* = 14.4, 6.7 Hz, 1H), 3.09 – 3.00 (m, 2H), 2.93 – 2.85 (m, 1H), 2.78-2.75 (m, 1H), 2.38 (s, 3H).

**<sup>13</sup>C NMR (101 MHz, CDCl<sub>3</sub>) δ** 144.7, 138.6, 136.2, 134.8, 134.6, 132.8, 129.8, 129.3, 128.2, 127.6, 126.9, 122.2, 119.5, 117.8, 111.3, 110.9, 58.2, 53.2, 50.9, 34.4, 25.7, 21.5.

**HRMS:** calcd for C<sub>26</sub>H<sub>27</sub>O<sub>4</sub>N<sub>2</sub>S<sub>2</sub> [M+H<sup>+</sup>] 495.1412; found 495.1406.

5-[(Phenylsulfonyl)methyl]-3-tosyl-1,2,3,4,5,6-hexahydroazepino[4,5-b]indole, **5c**

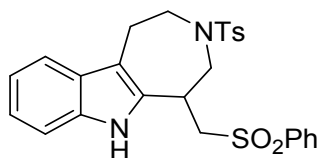

White solid, 86 mg, 87%

**Melting point:** 221-223 °C

**R<sub>f</sub>** = 0.4 (30% ethyl acetate in hexanes)

**IR (KBr) ν<sub>max</sub>:** 3365, 2945, 1572, 1336, 1286, 1041, 901, 565 cm<sup>-1</sup>.

**<sup>1</sup>H NMR (400 MHz, CDCl<sub>3</sub>) δ** 8.42 (s, 1H), 7.86 (d, *J* = 7.3 Hz, 2H), 7.68 (d, *J* = 8.3 Hz, 2H), 7.58-7.54 (m, 1H), 7.47-7.43 (m, 2H), 7.37 – 7.31 (m, 4H), 7.19-7.15 (m, 1H), 7.09-7.05 (m, 1H), 4.23 – 4.15 (m, 2H), 4.00 (dd, *J* = 14.4, 4.4 Hz, 1H), 3.88-3.85 (m, 1H), 3.47 (dd, *J* = 14.4, 6.8 Hz, 1H), 3.07-2.99 (m, 2H), 2.92 – 2.84 (m, 1H), 2.75-2.68 (m, 1H), 2.43 (s, 3H).

**<sup>13</sup>C NMR (101 MHz, CDCl<sub>3</sub>) δ** 143.7, 139.2, 135.7, 134.9, 134.6, 133.7, 129.9, 129.2, 128.2, 127.6, 127.0, 122.3, 119.5, 117.9, 111.5, 110.9, 58.3, 53.3, 50.9, 34.4, 25.7, 21.5.

**HRMS:** calcd for C<sub>26</sub>H<sub>27</sub>O<sub>4</sub>N<sub>2</sub>S<sub>2</sub> [M+H<sup>+</sup>] 495.1412; found 495.1409.

3-Tosyl-5-(tosylmethyl)-1,2,3,4,5,6-hexahydroazepino[4,5-b]indole, **5d**

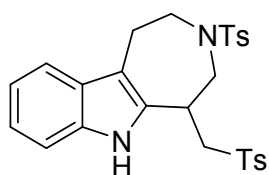

White solid, 91 mg, 90%

**Melting point:** 232-235 °C

**R<sub>f</sub>** = 0.4 (30% ethyl acetate in hexanes).

**IR (KBr) ν<sub>max</sub>:** 34047, 2946, 1617, 1412, 1339, 1082, 992, 687, 574 cm<sup>-1</sup>.

**<sup>1</sup>H NMR (400 MHz, CDCl<sub>3</sub>) δ** 8.43 (s, 1H), 7.73 (d, *J* = 8.3 Hz, 2H), 7.68 (d, *J* = 8.3 Hz, 2H), 7.36 (d, *J* = 7.9 Hz, 1H), 7.33 – 7.29 (m, 3H), 7.22 (d, *J* = 8.0 Hz, 2H), 7.18 – 7.14 (m, 1H), 7.09 – 7.05 (m, 1H), 4.22-4.14 (m, 2H), 3.97 (dd, *J* = 14.4, 4.4 Hz, 1H), 3.86-3.84 (m, 1H), 3.45 (dd, *J* = 14.4, 6.8 Hz, 1H), 3.06 – 2.99 (m, 2H), 2.92 – 2.84 (m, 1H), 2.75 – 2.68 (m, 1H), 2.43 (s, 3H), 2.37 (s, 3H).

**$^{13}\text{C}$  NMR (126 MHz,  $\text{CDCl}_3$ )  $\delta$**  144.7, 143.7, 136.3, 135.7, 134.8, 134.7, 129.9, 129.8, 128.2, 127.6, 127.0, 122.2, 119.5, 117.8, 111.4, 110.9, 58.3, 53.2, 50.9, 34.4, 25.7, 21.5, 21.5.

**HRMS:** calcd for  $\text{C}_{27}\text{H}_{28}\text{O}_4\text{N}_2\text{S}_2$   $\text{Na}[\text{M}+\text{Na}^+]$  531.1388; found 531.1384.

7-Methyl-3-(phenylsulfonyl)-5-[(phenylsulfonyl)methyl]-1,2,3,4,5,6-hexahydroazepino[4,5-b]indole, **5e**

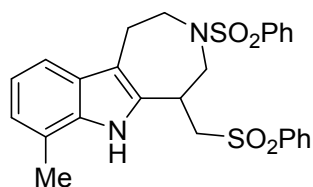

White solid, 80 mg, 81%

**Melting point:** 201-203 °C

**$R_f$**  = 0.5 (30% ethyl acetate in hexanes).

**IR (KBr)  $\nu_{\text{max}}$ :** 3385, 2926, 1593, 1451, 1290, 1092, 724, 549  $\text{cm}^{-1}$ .

**$^1\text{H}$  NMR (400 MHz,  $\text{CDCl}_3$ )  $\delta$**  8.41 (s, 1H), 7.87 (dd,  $J$  = 8.4, 1.2 Hz, 2H), 7.82 (dd,  $J$  = 8.3, 1.3 Hz, 2H), 7.61 – 7.52 (m, 4H), 7.47 – 7.43 (m, 2H), 7.21 (d,  $J$  = 6.8 Hz, 1H), 7.02 – 6.96 (m, 2H), 4.27 (ddd,  $J$  = 13.9, 3.6, 1.1 Hz, 1H), 4.19 (dt,  $J$  = 12.9, 3.4 Hz, 1H), 4.03 (dd,  $J$  = 14.3, 4.7 Hz, 1H), 3.93 – 3.89 (m, 1H), 3.46 (dd,  $J$  = 14.3, 6.5 Hz, 1H), 3.08 (dd,  $J$  = 13.9, 2.1 Hz, 1H), 3.02 (ddd,  $J$  = 15.9, 4.2, 2.3 Hz, 1H), 2.93 – 2.85 (m, 1H), 2.78 – 2.71 (m, 1H), 2.49 (s, 3H).

**$^{13}\text{C}$  NMR (126 MHz,  $\text{CDCl}_3$ )  $\delta$**  139.2, 138.7, 134.4, 134.3, 133.7, 132.9, 129.3, 129.1, 127.7, 127.5, 126.9, 122.8, 120.2, 119.8, 115.6, 112.0, 58.1, 53.2, 51.0, 34.4, 25.9, 16.6.

**HRMS:** calcd for  $\text{C}_{26}\text{H}_{27}\text{O}_4\text{N}_2\text{S}_2$   $[\text{M}+\text{H}^+]$  495.1412; found 495.1410.

7-Methyl-3-(phenylsulfonyl)-5-(tosylmethyl)-1,2,3,4,5,6-hexahydroazepino[4,5-b]indole, **5f**

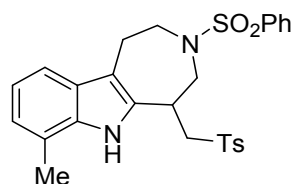

White solid, 82 mg, 81%

**Melting point:** 190-192 °C

**$R_f$**  = 0.48 (30% ethyl acetate in hexanes).

**IR (KBr)  $\nu_{\text{max}}$ :** 3365, 2924, 1596, 1336, 1286, 1041, 901, 565  $\text{cm}^{-1}$ .

**$^1\text{H}$  NMR (500 MHz,  $\text{CDCl}_3$ )  $\delta$**  8.38 (s, 1H), 7.81 (d,  $J = 8.7$  Hz, 2H), 7.74 (d,  $J = 8.2$  Hz, 2H), 7.62-7.59 (m, 1H), 7.55-7.52 (m, 2H), 7.24 – 7.20 (m, 3H), 7.00 – 6.96 (m, 2H), 4.25 (dd,  $J = 13.8, 3.0$  Hz, 1H), 4.18 (dt,  $J = 13.0, 3.3$  Hz, 1H), 3.99 (dd,  $J = 14.4, 4.6$  Hz, 1H), 3.90 – 3.86 (m, 1H), 3.45 (dd,  $J = 14.4, 6.6$  Hz, 1H), 3.08 (dd,  $J = 13.8, 1.9$  Hz, 1H), 3.03 – 2.99 (m, 1H), 2.92 – 2.86 (m, 1H), 2.77 – 2.71 (m, 1H), 2.48 (s, 3H), 2.37 (s, 3H).

**$^{13}\text{C}$  NMR (126 MHz,  $\text{CDCl}_3$ )  $\delta$**  144.8, 138.7, 136.2, 134.4, 134.4, 132.8, 129.7, 129.3, 127.8, 127.5, 126.9, 122.7, 120.2, 119.8, 115.6, 111.9, 58.2, 53.2, 50.9, 34.5, 25.8, 21.5, 16.6.

**HRMS:** calcd for  $\text{C}_{27}\text{H}_{28}\text{O}_4\text{N}_2\text{S}_2\text{Na}$  [ $\text{M}+\text{Na}^+$ ] 531.1388; found 531.1385.

7-Methyl-5-[(phenylsulfonyl)methyl]-3-tosyl-1,2,3,4,5,6-hexahydroazepino[4,5-b]indole, **5g**

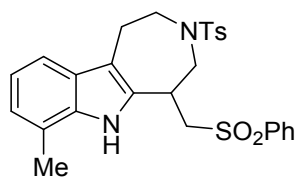

**Melting point:** 185-187  $^{\circ}\text{C}$

White solid, 79 mg 78%

$R_f = 0.46$  (30% ethyl acetate in hexanes)

**IR (KBr)  $\nu_{\text{max}}$ :** 3383, 2926, 1496, 1396, 1290, 1091, 814, 716, 674, 600, 546  $\text{cm}^{-1}$

**$^1\text{H}$  NMR (400 MHz,  $\text{CDCl}_3$ )  $\delta$**  8.41 (s, 1H), 7.88 – 7.85 (m, 2H), 7.69 (d,  $J = 8.3$  Hz, 2H), 7.57 – 7.53 (m, 1H), 7.47 – 7.43 (m, 2H), 7.33 (d,  $J = 8.0$  Hz, 2H), 7.21 (d,  $J = 7.2$  Hz, 1H), 7.02 – 6.96 (m, 2H), 4.25 (dd,  $J = 14.4, 3.1$  Hz, 1H), 4.17 (dt,  $J = 6.9, 3.2$  Hz, 1H), 4.03 (dd,  $J = 14.4, 4.7$  Hz, 1H), 3.92 – 3.88 (m, 1H), 3.46 (dd,  $J = 14.3, 6.5$  Hz, 1H), 3.07 – 2.98 (m, 2H), 2.92-2.84 (m, 1H), 2.76 – 2.67 (m, 1H), 2.48 (s, 3H), 2.43 (s, 3H).

**$^{13}\text{C}$  NMR (101 MHz,  $\text{CDCl}_3$ )  $\delta$**  143.7, 139.2, 135.7, 134.4, 134.3, 133.7, 129.9, 129.1, 127.8, 127.5, 127.0, 122.8, 120.2, 119.8, 115.6, 112.0, 58.2, 53.2, 50.9, 34.4, 25.9, 21.5, 16.6.

**HRMS:** calcd for  $\text{C}_{27}\text{H}_{29}\text{O}_4\text{N}_2\text{S}_2$  [ $\text{M}+\text{H}^+$ ] 509.1569; found 509.1561.

7-Methyl-3-tosyl-5-(tosylmethyl)-1,2,3,4,5,6-hexahydroazepino[4,5-b]indole, **5h**

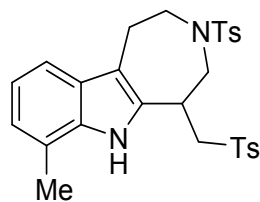

White solid, 84 mg, 80%

**Melting point:** 220-222 °C

$R_f$  = 0.52 (30% ethyl acetate in hexanes)

**IR (KBr)  $\nu_{\max}$ :** 3397, 2926, 1593, 1451, 1290, 1092, 724, 549.

**$^1\text{H}$  NMR (400 MHz,  $\text{CDCl}_3$ )  $\delta$**  8.33 (s, 1H), 7.66 (d,  $J$  = 8.3 Hz, 2H), 7.62 (d,  $J$  = 8.3 Hz, 2H), 7.25 (d,  $J$  = 8.0 Hz, 2H), 7.17-7.13 (m, 3H), 6.94 – 6.88 (m, 2H), 4.16 (dd,  $J$  = 13.8, 2.7 Hz, 1H), 4.09 (dt,  $J$  = 13.5, 3.7 Hz, 1H), 3.91 (dd,  $J$  = 14.4, 4.5 Hz, 1H), 3.82 – 3.78 (m, 1H), 3.37 (dd,  $J$  = 14.3, 6.6 Hz, 1H), 3.00 – 2.90 (m, 2H), 2.85 – 2.77 (m, 1H), 2.68 – 2.61 (m, 1H), 2.41 (s, 4H), 2.36 (s, 4H), 2.30 (s, 3H).

**$^{13}\text{C}$  NMR (101 MHz,  $\text{CDCl}_3$ )  $\delta$**  144.8, 143.7, 136.3, 135.7, 134.4, 129.9, 129.7, 127.8, 127.5, 127.0, 122.7, 120.2, 119.8, 115.6, 111.9, 58.3, 53.2, 50.9, 34.5, 25.9, 21.6, 21.5, 16.6.

**HRMS:** calcd for  $\text{C}_{28}\text{H}_{30}\text{O}_4\text{N}_2\text{S}_2\text{Na}[\text{M}+\text{Na}^+]$  545.1545; found 545.1536.

9-fluoro-5-[(phenylsulfonyl)methyl]-3-tosyl-1,2,3,4,5,6-hexahydroazepino[4,5-b]indole, **5i**

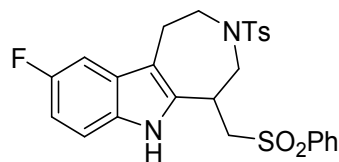

White solid, 85 mg 83%

**Melting point:** 251-253 °C

$R_f$  = 0.50 (30% ethyl acetate in hexanes)

**IR (KBr)  $\nu_{\max}$ :** 3393, 2926, 1593, 1451, 1399, 1290, 1153, 1092, 680, 549  $\text{cm}^{-1}$ .

**$^1\text{H}$  NMR (500 MHz,  $\text{CDCl}_3$ )  $\delta$**  8.51 (s, 1H), 7.84 (d,  $J$  = 7.6 Hz, 2H), 7.68 (d,  $J$  = 8.1 Hz, 2H), 7.57-7.55 (m, 1H), 7.46-7.43 (m, 2H), 7.32 (d,  $J$  = 8.0 Hz, 2H), 7.22 (dd,  $J$  = 8.7, 4.3 Hz, 1H), 6.99 – 6.97 (m, 1H), 6.92-6.88 (m, 1H), 4.21 (m, 1H), 4.16-4.14 (d,  $J$  = 11.1 Hz, 2H), 3.97 (dd,  $J$  = 14.4, 4.2 Hz, 1H), 3.86-3.85 (m, 1H), 3.51 (dd,  $J$  = 14.4, 7.2 Hz, 1H), 3.05-3.02 (m, 1H), 2.92 – 2.81 (m, 2H), 2.72-2.67 (m, 1H), 2.43 (s, 3H).

**<sup>13</sup>C NMR (126 MHz, CDCl<sub>3</sub>)** δ 157.9 (d, *J* = 235.0 Hz), 143.8, 139.2, 136.5, 135.6, 133.8, 131.3, 130.0, 129.4, 129.2, 128.7 (d, *J* = 9.5 Hz), 128.3, 127.6, 127.0, 111.7 (d, *J* = 9.8 Hz), 110.6 (d, *J* = 26.4 Hz), 103.00 (d, *J* = 23.5 Hz), 58.2, 53.2, 50.8, 34.5, 25.8, 21.6.

**HRMS:** calcd for C<sub>26</sub>H<sub>26</sub>FO<sub>4</sub>N<sub>2</sub>S<sub>2</sub> [M+H<sup>+</sup>] 513.1318; found 513.1308.

9-Fluoro-3-tosyl-5-(tosylmethyl)-1,2,3,4,5,6-hexahydroazepino[4,5-b]indole, **5j**

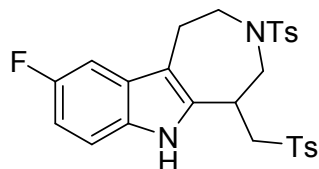

White solid, 92 mg, 87%

**Melting point:** 251-253 °C

**R<sub>f</sub>** = 0.51 (30% ethyl acetate in hexanes)

**IR (KBr)** ν<sub>max</sub>: 3373, 2924, 1594, 1452, 1334, 1291, 1153, 1093, 1033, 905, 807, 695, 608 cm<sup>-1</sup>.

**<sup>1</sup>H NMR (500 MHz, CDCl<sub>3</sub>)** δ 8.50 (s, 1H), 7.71 (d, *J* = 8.3 Hz, 2H), 7.67 (d, *J* = 8.3 Hz, 2H), 7.32 (d, *J* = 8.0 Hz, 2H), 7.23 – 7.21 (m, 3H), 6.98 (dd, *J* = 9.6, 2.3 Hz, 1H), 6.90 (td, *J* = 9.1, 2.4 Hz, 1H), 4.21-4.13 (m, 2H), 3.93 (dd, *J* = 14.4, 4.2 Hz, 1H), 3.84-3.82 (m, 1H), 3.48 (dd, *J* = 14.4, 7.2 Hz, 1H), 3.04 (dd, *J* = 13.8, 1.9 Hz, 1H), 2.92 – 2.81 (m, 2H), 2.73 – 2.67 (m, 1H), 2.43 (s, 3H), 2.38 (s, 3H).

**<sup>13</sup>C NMR (125 MHz, CDCl<sub>3</sub>)** δ 157.9 (d, *J* = 292.3 Hz), 144.9, 143.8, 136.6, 136.2, 135.6, 131.3, 130.0, 129.8, 127.6, 127.0, 110.4 (d, *J* = 32.8 Hz), 110.4 (d, *J* = 32.8 Hz), 102.9 (d, *J* = 30.2 Hz), 58.3, 53.2, 50.8, 34.6, 25.8, 21.6(2).

**HRMS:** calcd for C<sub>27</sub>H<sub>28</sub>O<sub>4</sub>FN<sub>2</sub>S<sub>2</sub> [M+H<sup>+</sup>] 527.1475; found 527.1468.

9-(benzyloxy)-3-(phenylsulfonyl)-5-[(phenylsulfonyl)methyl]-1,2,3,4,5,6-hexahydroazepino[4,5-b]indole, **5k**

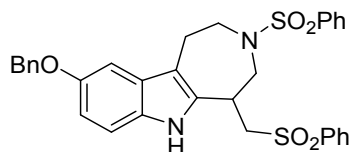

White solid, 81 mg 69%

**Melting point:** 123-125 °C

$R_f = 0.47$  (30% ethyl acetate in hexanes)

**IR (KBr)**  $\nu_{\max}$ : 3384, 2922, 1720, 1588, 1451, 1301, 1155, 1093, 801, 691, 573  $\text{cm}^{-1}$ .

**$^1\text{H}$  NMR (400 MHz,  $\text{CDCl}_3$ )**  $\delta$  8.29 (s, 1H), 7.85-7.83 (m, 2H), 7.81-7.79 (m, 2H), 7.60-7.52 (m, 4H), 7.47-7.33 (m, 7H), 7.21 (d,  $J = 8.7$  Hz, 1H), 6.92 – 6.87 (m, 2H), 5.08 (s, 3H), 4.23 – 4.16 (m, 2H), 3.98 (dd,  $J = 14.4, 4.5$  Hz, 1H), 3.86-3.81 (m, 1H), 3.48 (dd,  $J = 14.4, 6.9$  Hz, 1H), 3.06 (d,  $J = 11.7$  Hz, 1H), 2.96-2.80 (m, 3H), 2.75-2.69 (m, 1H).

**$^{13}\text{C}$  NMR (126 MHz,  $\text{CDCl}_3$ )**  $\delta$  153.3, 139.2, 138.6, 137.6, 133.7, 132.9, 130.2, 129.3, 129.2, 128.6, 128.5, 128.2, 127.8, 127.5 (2), 126.9, 113.0, 111.7, 111.3, 101.9, 71.0, 58.2, 53.2, 50.9, 34.5, 25.8.

**HRMS:** calcd for  $\text{C}_{32}\text{H}_{30}\text{O}_5\text{N}_2\text{S}_2\text{Na}[\text{M}+\text{Na}^+]$  609.1494; found 609.1476.

9-(benzyloxy)-5-[(phenylsulfonyl)methyl]-3-tosyl-1,2,3,4,5,6-hexahydroazepino[4,5-b]indole, **5I**

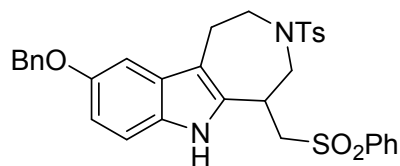

White solid, 84 mg 70%

**Melting point:** 148-150  $^{\circ}\text{C}$

$R_f = 0.48$  (30% ethyl acetate in hexanes)

**IR (KBr)**  $\nu_{\max}$ : 3347, 2924, 1594, 1488, 1336, 1158, 811, 676  $\text{cm}^{-1}$ .

**$^1\text{H}$  NMR (400 MHz,  $\text{CDCl}_3$ )**  $\delta$  8.31 (s, 1H), 7.84 (d,  $J = 7.4$  Hz, 2H), 7.68 (d,  $J = 8.2$  Hz, 2H), 7.56-7.52 (m, 1H), 7.47 – 7.36 (m, 7H), 7.33-7.30 (m, 3H), 7.21 (d,  $J = 8.7$  Hz, 1H), 6.92 – 6.88 (m, 2H), 5.08 (s, 2H), 4.22 – 4.13 (m, 2H), 3.98 (dd,  $J = 14.4, 4.5$  Hz, 1H), 3.84-3.81 (m, 1H), 3.48 (dd,  $J = 14.4, 6.9$  Hz, 1H), 3.03 (dd,  $J = 13.7, 1.7$  Hz, 1H), 2.95 – 2.79 (m, 2H), 2.72 – 2.66 (m, 1H).

**$^{13}\text{C}$  NMR (101 MHz,  $\text{CDCl}_3$ )**  $\delta$  153.3, 143.7, 139.2, 137.6, 135.6, 135.4, 133.7, 130.2, 129.9, 129.2, 128.6, 128.5, 127.8, 127.5, 127.5, 127.0, 113.0, 111.6, 111.3, 101.9, 71.0, 58.2, 53.2, 50.9, 34.5, 25.8, 21.5.

**HRMS:** calcd for  $\text{C}_{33}\text{H}_{33}\text{O}_5\text{N}_2\text{S}_2$   $[\text{M}+\text{H}^+]$  601.1831; found 601.1821.

1-Methyl-2-(methylsulfonyl)-1-(tosylmethyl)-2,3,4,9-tetrahydro-1H-pyrido[3,4-b]indole, **1**

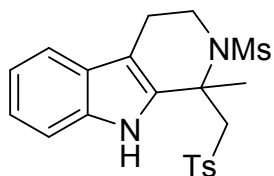

White solid, 69 mg 80%.

**Melting point:** 175-178 °C

**R<sub>f</sub>** = 0.52 (30% ethyl acetate in hexanes)

**IR (KBr)**  $\nu_{\text{max}}$  3368, 2989, 1594, 1459, 1209, 1145, 965, 769, 672, 584  $\text{cm}^{-1}$ .

**<sup>1</sup>H NMR (400 MHz, CDCl<sub>3</sub>)**  $\delta$  8.95 (s, 1H), 7.64 (d,  $J$  = 8.3 Hz, 2H), 7.45 (d,  $J$  = 7.9 Hz, 1H), 7.31 (d,  $J$  = 8.1 Hz, 1H), 7.22 – 7.16 (m, 3H), 7.13 – 7.09 (m, 1H), 4.33 (d,  $J$  = 14.6 Hz, 1H), 4.13 (d,  $J$  = 14.6 Hz, 1H), 3.92-3.86 (m, 1H), 3.59-3.52 (m, 1H), 3.10 (s, 3H), 2.85-2.82 (m, 2H), 2.34 (s, 3H), 2.20 (s, 3H).

**<sup>13</sup>C NMR (126 MHz, CDCl<sub>3</sub> + DMSO-*d*<sub>6</sub>)**  $\delta$  143.7, 136.2, 136.0, 133.3, 128.4, 127.0, 125.4, 121.8, 119.1, 118.0, 110.9, 108.8, 62.4, 59.6, 43.8, 41.8, 41.7, 27.3, 21.2.

**HRMS:** calcd for C<sub>21</sub>H<sub>25</sub>O<sub>4</sub>N<sub>2</sub>S<sub>2</sub> [M+H<sup>+</sup>] 433.1256; found 433.1254.

## 6. Procedure for the conversion of tetrahydro-β-carboline **1** to the tetrahydroazepinoindole **5m**

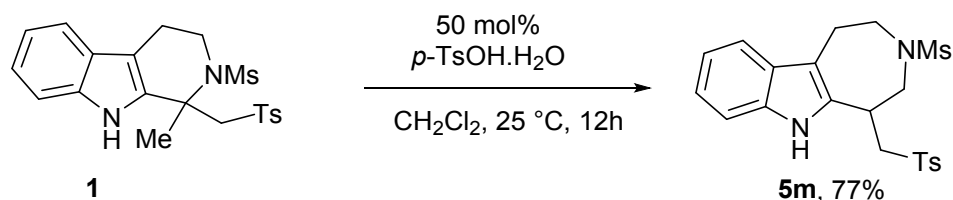

To a solution of **1** (43 mg, 0.10 mmol) in dichloromethane (2 mL) maintained at ambient temperature *p*-TsOH.H<sub>2</sub>O (10 mg, 0.05 mmol) was added and the reaction was stirred for 12 h at 25 °C. Silica gel was then added to the reaction mixture, the solvent was evaporated on a rotavapor and the residue was chromatographed on a silica column using petroleum ether-ethyl acetate as eluent to afford analytically pure sample of the product **5m** (33 mg, 77%).

3-(Methanesulfonyl)-5-(tosylmethyl)-1,2,3,4,5,6-hexahydroazepino[4,5-*b*]indole, **5m**

White solid, 33 mg, 77 %

**Melting point:** 190-192 °C

**R<sub>f</sub>** = 0.51 (30% ethyl acetate in hexanes).

**IR (KBr)  $\nu_{\text{max}}$ :** 3350, 2582, 1682, 1471, 1354, 1185, 1042, 750, 654  $\text{cm}^{-1}$ .

**<sup>1</sup>H NMR (500 MHz, CDCl<sub>3</sub>)  $\delta$**  8.47 (s, 1H), 7.68 (d,  $J$  = 8.3 Hz, 2H), 7.39 (d,  $J$  = 7.9 Hz, 1H), 7.34-7.32 (m, 1H), 7.21 – 7.17 (m, 3H), 7.10 – 7.07 (m, 1H), 4.20 – 4.16 (m, 1H), 4.13-4.11 (m, 1H), 3.88-3.84 (m, 2H), 3.40 (dd,  $J$  = 15.4, 7.9 Hz, 1H), 3.33 (dd,  $J$  = 13.8, 2.0 Hz, 1H, ), 3.07 (ddd,  $J$  = 15.8, 4.1, 2.0 Hz, 1H), 3.02-2.96 (m, 1H), 2.89-2.84 (m, 4H), 2.36 (s, 3H).

**<sup>13</sup>C NMR (126 MHz, CDCl<sub>3</sub>)  $\delta$**  144.9, 137.1, 136.2, 134.7, 129.7, 127.5, 125.7, 122.8, 119.9, 118.4, 111.5, 109.4, 59.9, 43.8, 43.6, 26.4, 21.8, 21.6.

**HRMS:** calcd for C<sub>21</sub>H<sub>25</sub>O<sub>4</sub>N<sub>2</sub>S<sub>2</sub> [M+H<sup>+</sup>] 433.1256; found 433.1264.

## 7. Single crystal X-ray analysis of **5e**

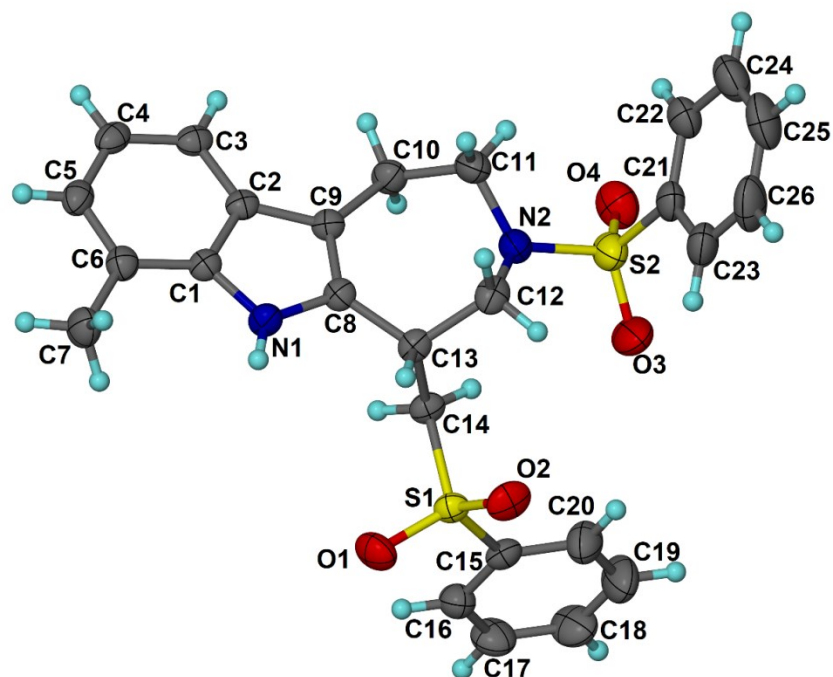

Figure 1: ORTEP diagram of **5e** with the atom-numbering. Displacement ellipsoids are drawn at the 35% probability level and H atoms are shown as small spheres of arbitrary radius. (CCDC2025452).

Table 1: Crystallographic details of **5e**.

## Datablock: BE27M

|                                                               |                            |                                  |                            |
|---------------------------------------------------------------|----------------------------|----------------------------------|----------------------------|
| Bond precision:                                               | C-C = 0.0037 Å             | Wavelength=0.71073               |                            |
| Cell:                                                         | a=16.1653 (14)<br>alpha=90 | b=8.6116 (7)<br>beta=111.557 (1) | c=18.7980 (16)<br>gamma=90 |
| Temperature:                                                  | 293 K                      |                                  |                            |
|                                                               | Calculated                 | Reported                         |                            |
| Volume                                                        | 2433.8 (4)                 | 2433.8 (4)                       |                            |
| Space group                                                   | P 21/n                     | P 21/n                           |                            |
| Hall group                                                    | -P 2yn                     | -P 2yn                           |                            |
| Moiety formula                                                | C26 H26 N2 O4 S2           | C26 H26 N2 O4 S2                 |                            |
| Sum formula                                                   | C26 H26 N2 O4 S2           | C26 H26 N2 O4 S2                 |                            |
| Mr                                                            | 494.61                     | 494.61                           |                            |
| Dx, g cm-3                                                    | 1.350                      | 1.350                            |                            |
| Z                                                             | 4                          | 4                                |                            |
| Mu (mm-1)                                                     | 0.254                      | 0.254                            |                            |
| F000                                                          | 1040.0                     | 1040.0                           |                            |
| F000'                                                         | 1041.42                    |                                  |                            |
| h,k,lmax                                                      | 21,11,24                   | 20,11,24                         |                            |
| Nref                                                          | 5578                       | 5569                             |                            |
| Tmin,Tmax                                                     | 0.906,0.934                | 0.906,0.934                      |                            |
| Tmin'                                                         | 0.906                      |                                  |                            |
| Correction method= # Reported T Limits: Tmin=0.906 Tmax=0.934 |                            |                                  |                            |
| AbsCorr = MULTI-SCAN                                          |                            |                                  |                            |
|                                                               |                            |                                  |                            |
| Data completeness=                                            | 0.998                      | Theta(max)= 27.494               |                            |
|                                                               |                            |                                  |                            |
| R(reflections)=                                               | 0.0488 ( 3883)             | wR2(reflections)= 0.1296 ( 5569) |                            |
|                                                               |                            |                                  |                            |
| S = 1.014                                                     | Npar= 340                  |                                  |                            |

## 8. Single crystal X-ray analysis of 1

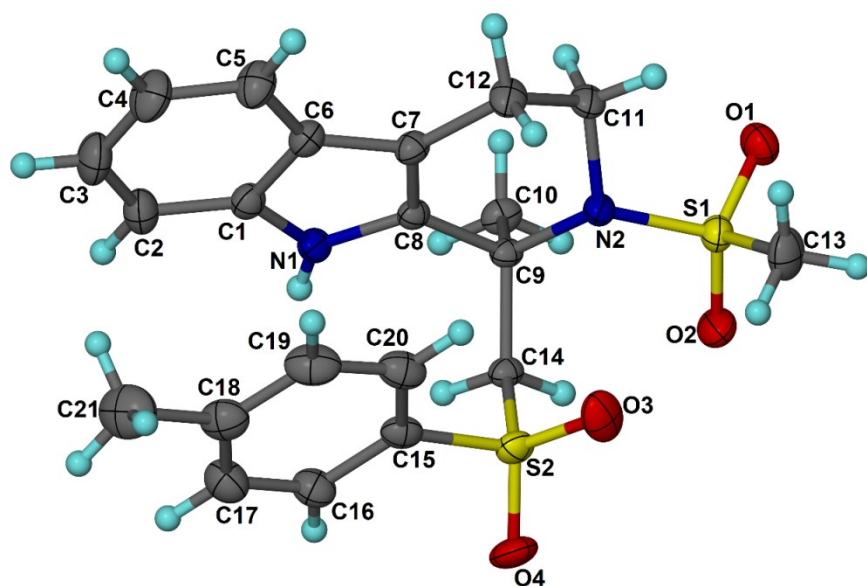

Figure 2: ORTEP diagram of **1** with the atom-numbering. Displacement ellipsoids are drawn at the 35% probability level and H atoms are shown as small spheres of arbitrary radius. (CCDC2025453).

Table 2: Crystallographic details of **1**.

## Datablock: BE40M

|                                                               |                  |                                  |                    |
|---------------------------------------------------------------|------------------|----------------------------------|--------------------|
| Bond precision:                                               | C-C = 0.0033 Å   |                                  | Wavelength=0.71073 |
| Cell:                                                         | a=12.745 (3)     | b=8.2887 (17)                    | c=20.697 (4)       |
|                                                               | alpha=90         | beta=104.665 (3)                 | gamma=90           |
| Temperature:                                                  | 293 K            |                                  |                    |
|                                                               | Calculated       | Reported                         |                    |
| Volume                                                        | 2115.2 (8)       | 2115.2 (8)                       |                    |
| Space group                                                   | P 21/n           | P 21/n                           |                    |
| Hall group                                                    | -P 2yn           | -P 2yn                           |                    |
| Moiety formula                                                | C21 H24 N2 O4 S2 | C21 H24 N2 O4 S2                 |                    |
| Sum formula                                                   | C21 H24 N2 O4 S2 | C21 H24 N2 O4 S2                 |                    |
| Mr                                                            | 432.54           | 432.54                           |                    |
| Dx, g cm-3                                                    | 1.358            | 1.358                            |                    |
| Z                                                             | 4                | 4                                |                    |
| Mu (mm-1)                                                     | 0.282            | 0.282                            |                    |
| F000                                                          | 912.0            | 912.0                            |                    |
| F000'                                                         | 913.37           |                                  |                    |
| h,k,lmax                                                      | 16,10,26         | 16,10,26                         |                    |
| Nref                                                          | 4858             | 4850                             |                    |
| Tmin,Tmax                                                     | 0.891,0.919      | 0.891,0.919                      |                    |
| Tmin'                                                         | 0.891            |                                  |                    |
| Correction method= # Reported T Limits: Tmin=0.891 Tmax=0.919 |                  |                                  |                    |
| AbsCorr = MULTI-SCAN                                          |                  |                                  |                    |
| Data completeness=                                            | 0.998            | Theta(max)= 27.499               |                    |
| R(reflections)=                                               | 0.0524 ( 4496)   | wR2(reflections)= 0.1333 ( 4850) |                    |
| S =                                                           | 1.152            | Npar= 269                        |                    |

## 9. Data collection and Structure solution details

X-ray data for **5e** (BE27) and **1** (BE40) compounds were collected at room temperature using the Bruker Smart Apex CCD diffractometer with graphite monochromated MoK $\alpha$  radiation ( $\lambda=0.71073\text{\AA}$ ) with  $\omega$ -scan method.<sup>3</sup> Preliminary lattice parameters and orientation matrices were obtained from four sets of frames. Unit cell dimensions were determined using 5938 reflections for **5e** (BE27) and 9807 for **1** (BE40) compounds. Integration and scaling of intensity data were accomplished using SAINT program.<sup>3</sup> The structure was solved by Direct Methods using SHELXS97<sup>4</sup> and refinement was carried out by full-matrix least-squares technique using SHELXL97.<sup>4</sup> Anisotropic displacement parameters were included for all non-hydrogen atoms. All H atoms were positioned geometrically and treated as riding on their parent C atoms, with C-H distances of 0.93--0.97  $\text{\AA}$ , and with  $U_{\text{iso}}(\text{H}) = 1.2U_{\text{eq}}(\text{C})$  or  $1.5U_{\text{eq}}$  for methyl atoms. N bound H atoms were located from the difference Fourier map and their positions were refined. In **5e** (BE27) crystal data, the sulfoxide S and O atoms were disordered over two sites, with the major component(S1/O1/O2) refining to 0.752(14) site occupancy and minor component (S1D/O1D/O2D) to 0.248(14) site occupancy. PART and FVAR instructions were used for the disorder treatment. The anisotropic displacement parameters of the disordered atoms were restrained to be similar (SIMU instruction) and the direction of motion along the axis between these atoms was also restrained (DELU instruction).<sup>5</sup> **CCDC2025452 (5e)** and **CCDC-2025453 (1)** contains the supplementary crystallographic data for this paper which can be obtained free of charge at <https://www.ccdc.cam.ac.uk/structures/>.

## 10. References

1. S. Undeela, S. Thadkapally, J. B. Nanubolu, K. K. Singarapu and R. S. Menon, *Chem. Commun.*, 2015, **51**, 13748-13751.
2. (a) Y.-S. Zhang, X.-Y. Tang and M. Shi, *Org. Chem. Front.*, 2015, **2**, 1516-1520. (b) M. E. Keiffer, K. V. Chuang and S. E. Reisman, *Chem. Sci.*, 2012, **3**, 3170-3174.
3. SMART & SAINT. Software Reference manuals. Versions 6.28a & 5.625, Bruker Analytical X-ray Systems Inc., Madison, Wisconsin, U.S.A., 2001.
4. Sheldrick, G. M. SHELXS97 and SHELXL Version 2014/7, <http://shelx.uni-ac.gwdg.de/SHELX/index.php>
5. Muller, P, Herbst-Imer, R, Spek, A. L, Schneider, T. R, and Sawaya, M. R. Crystal Structure Refinement: A Crystallographer's Guide to SHELXL. Muller, P. Ed. 2006 Oxford University Press: Oxford, New York, pp. 57–91

**4a**

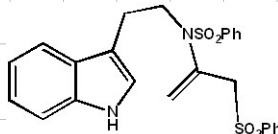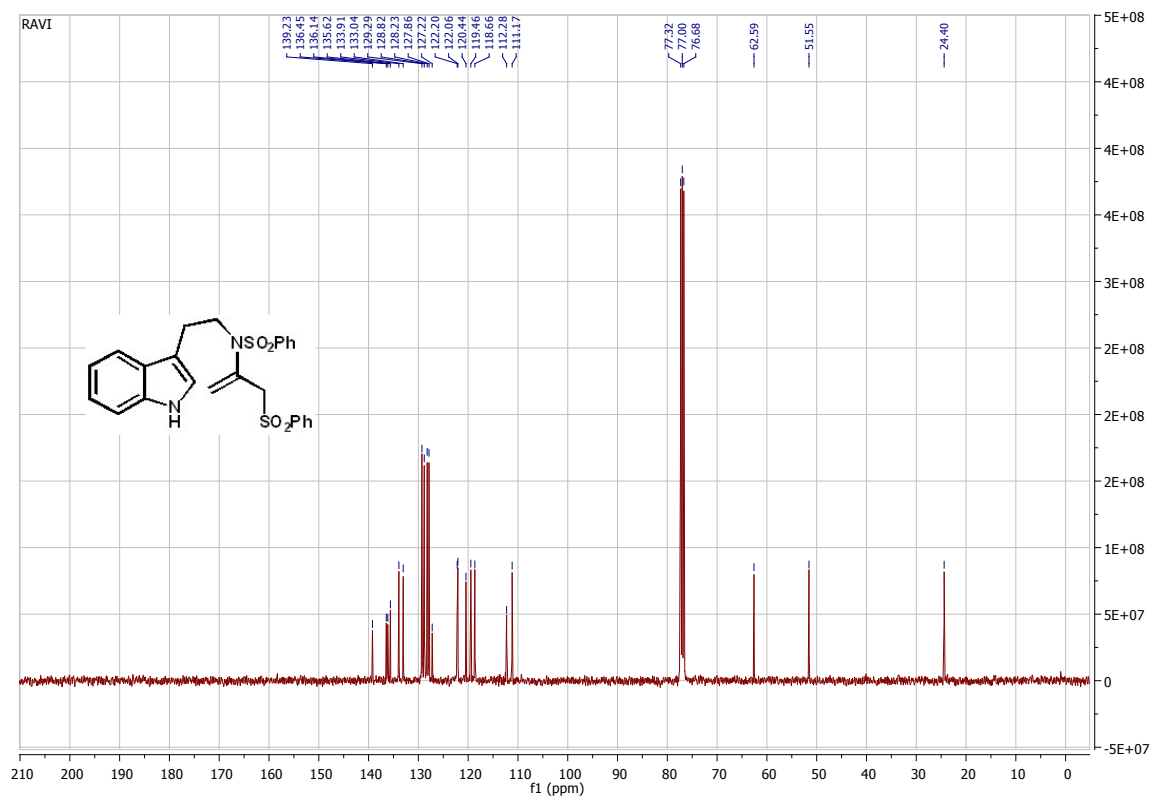

4b

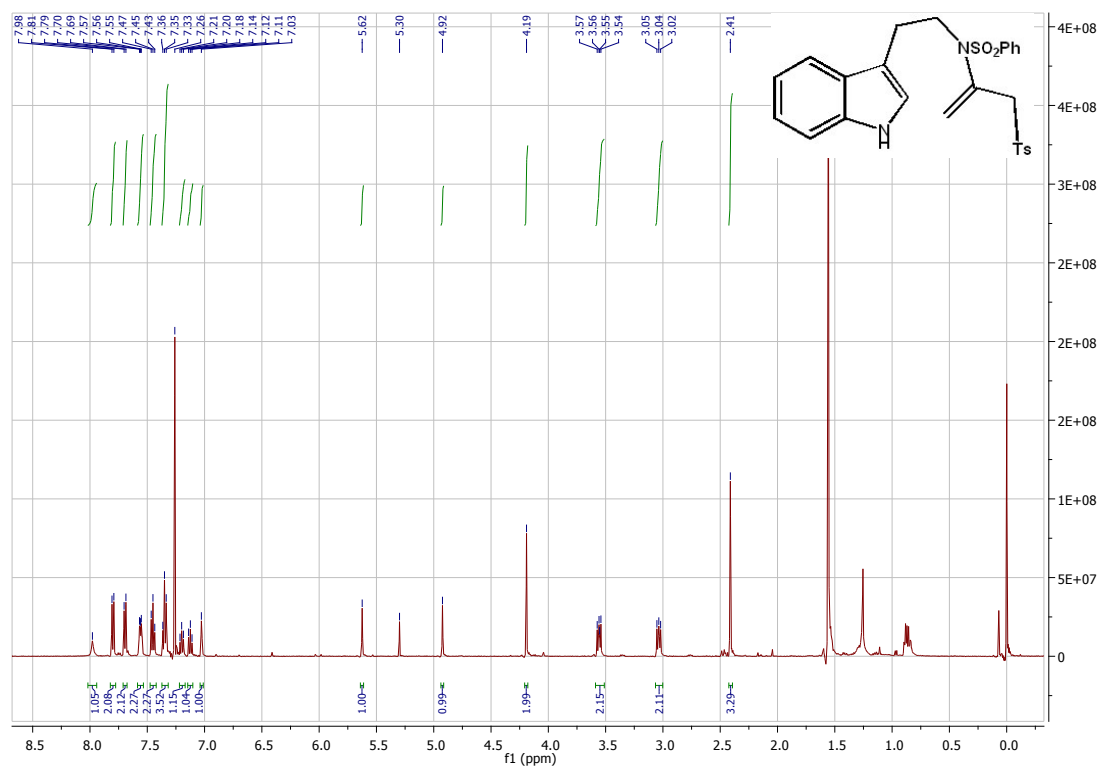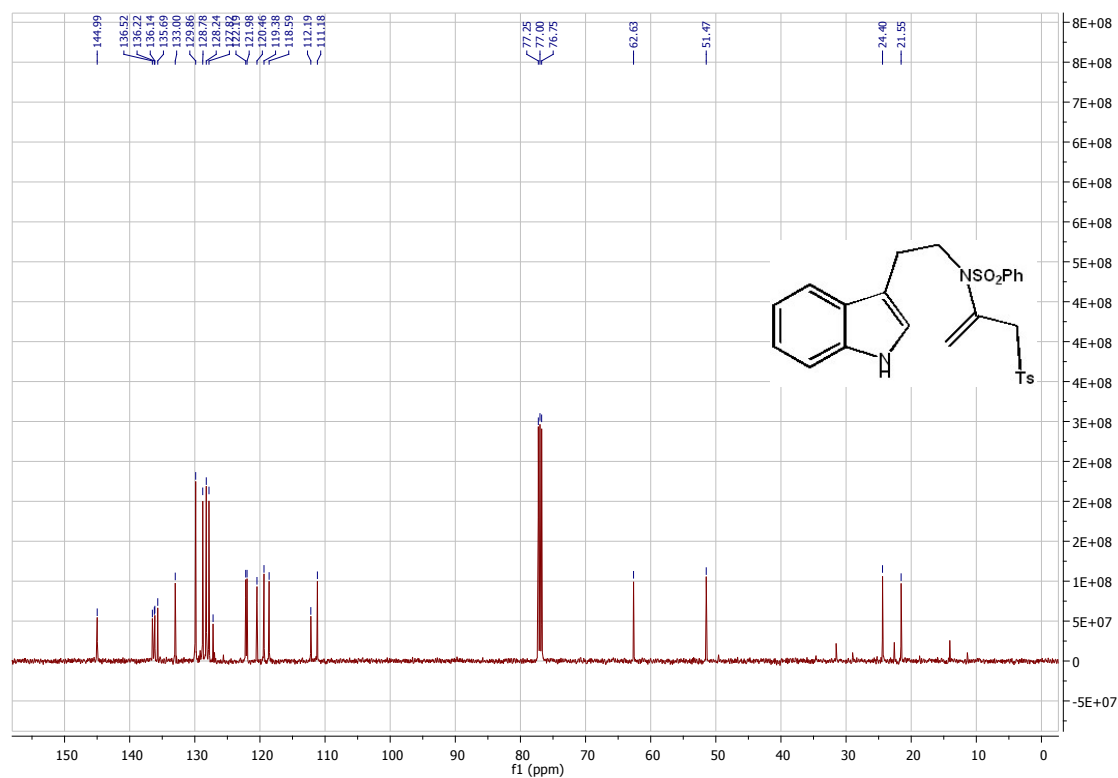

4c

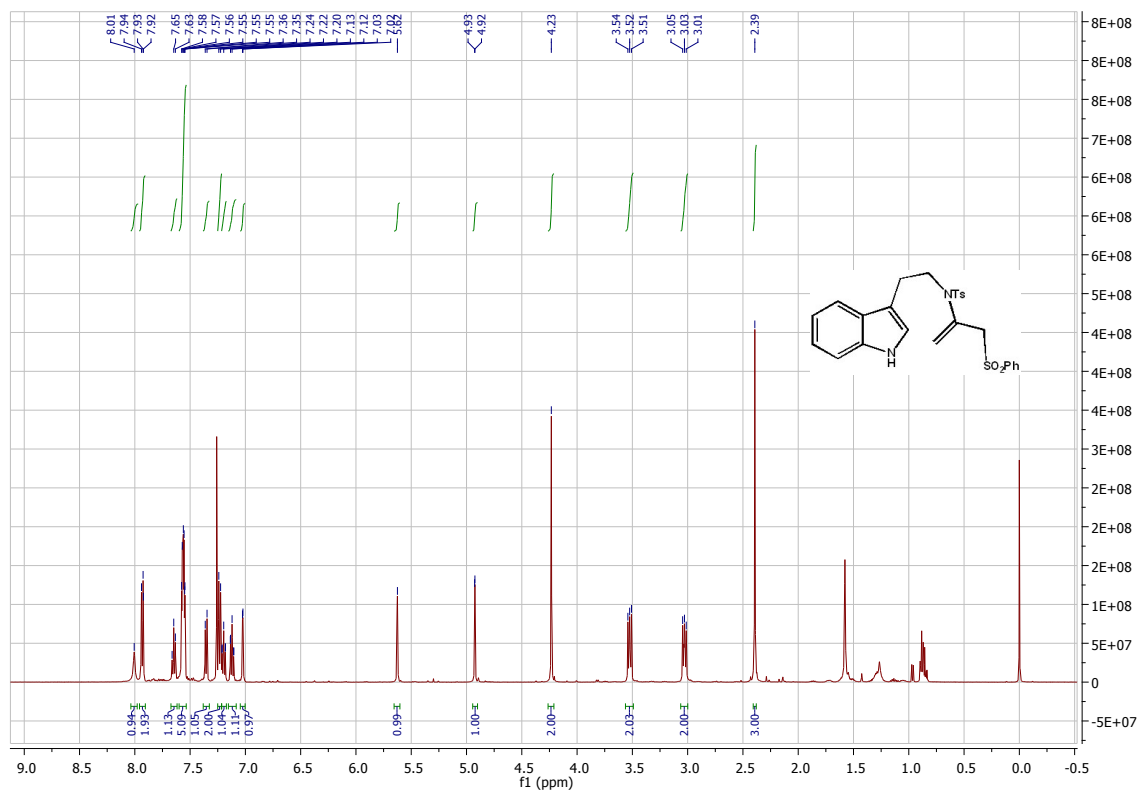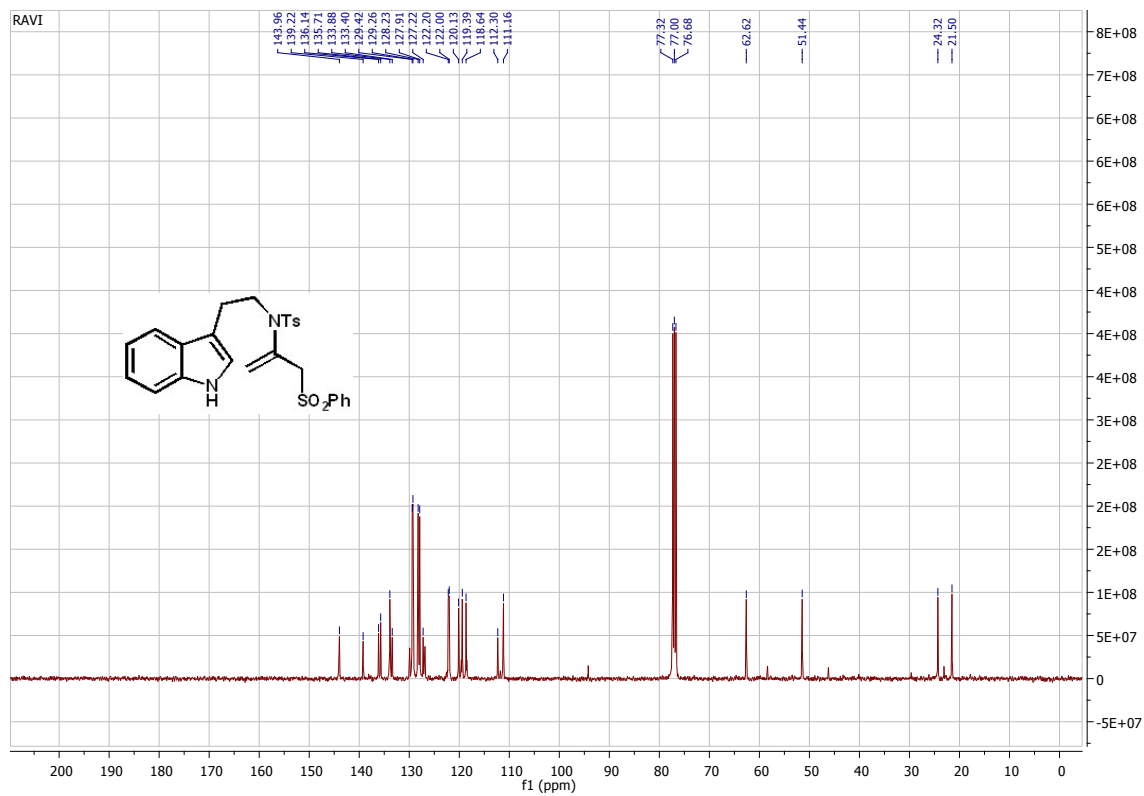

# 4d

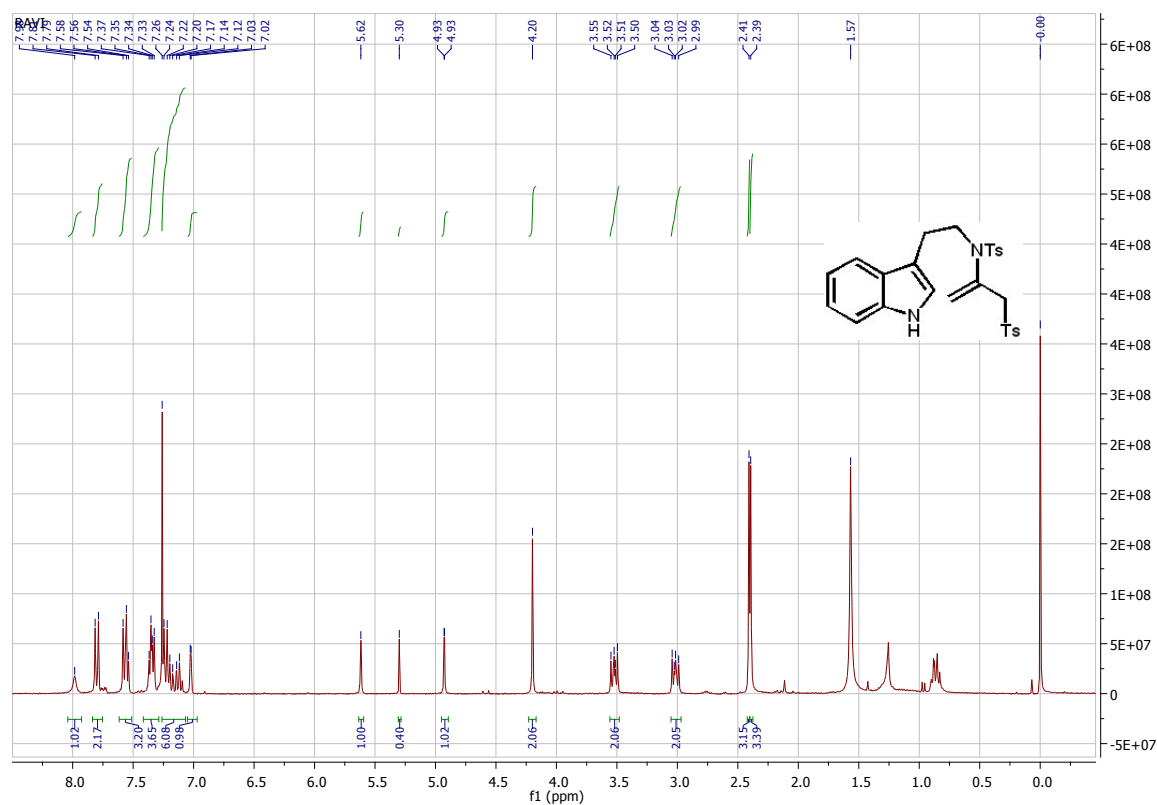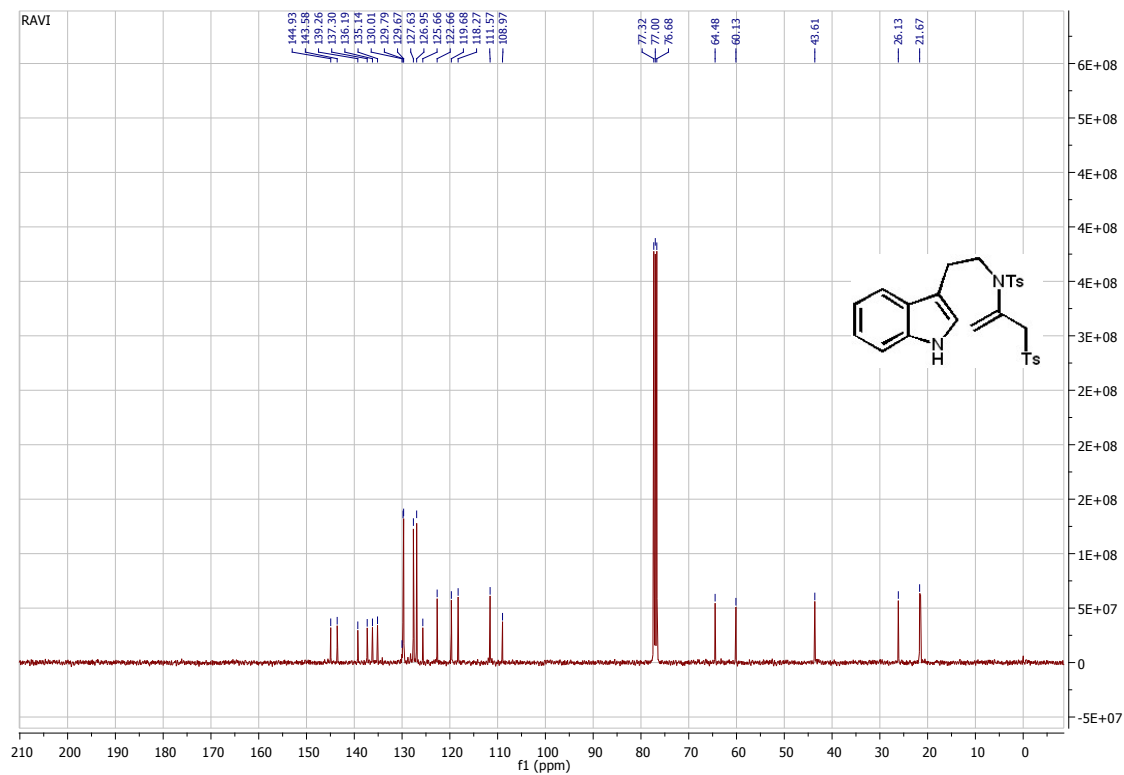

4e

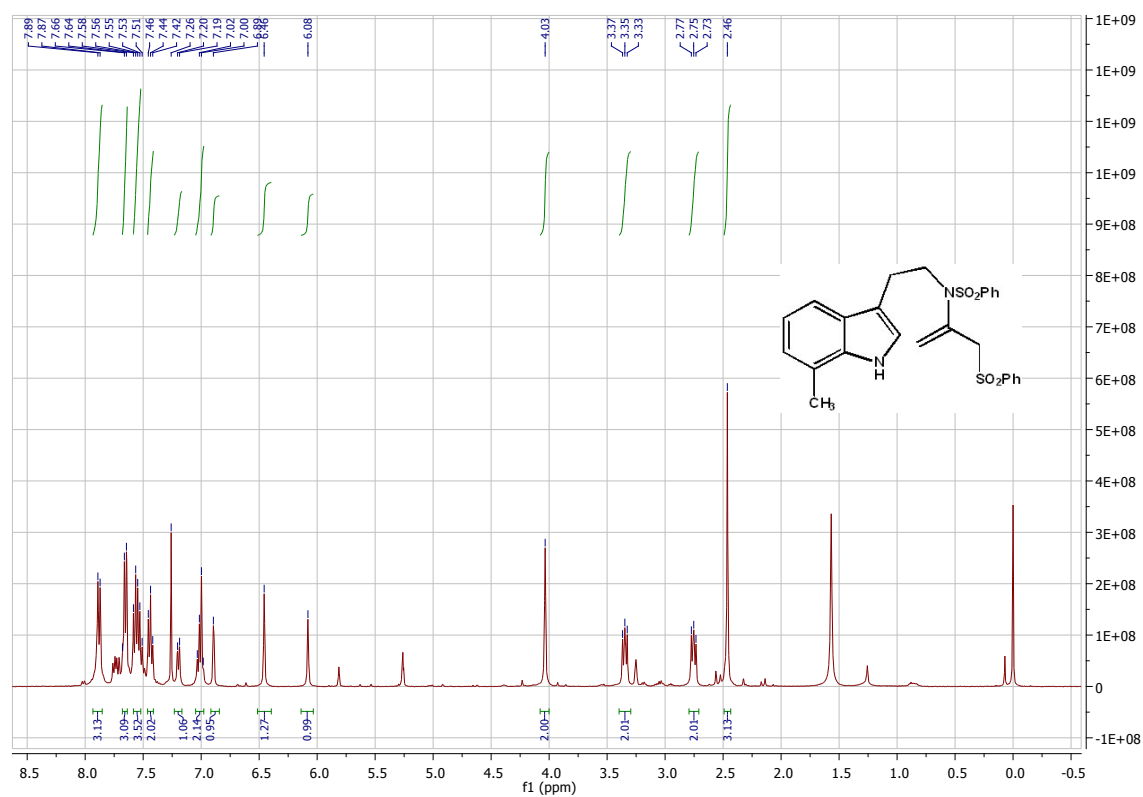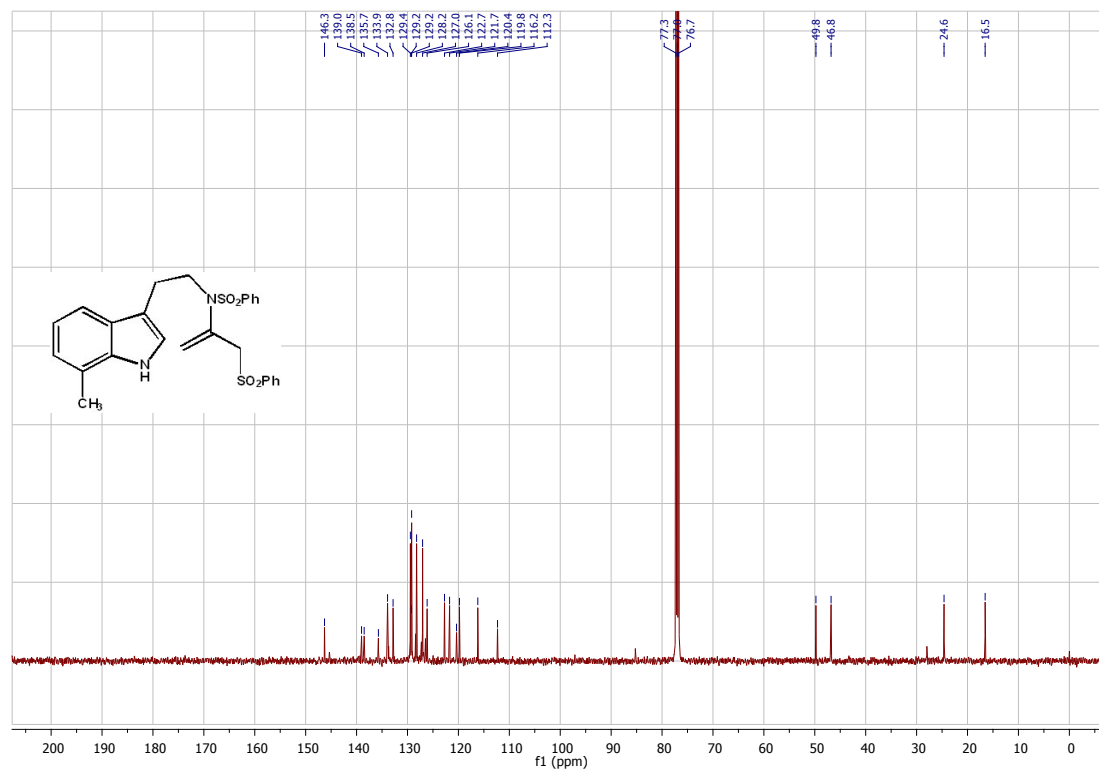

4f

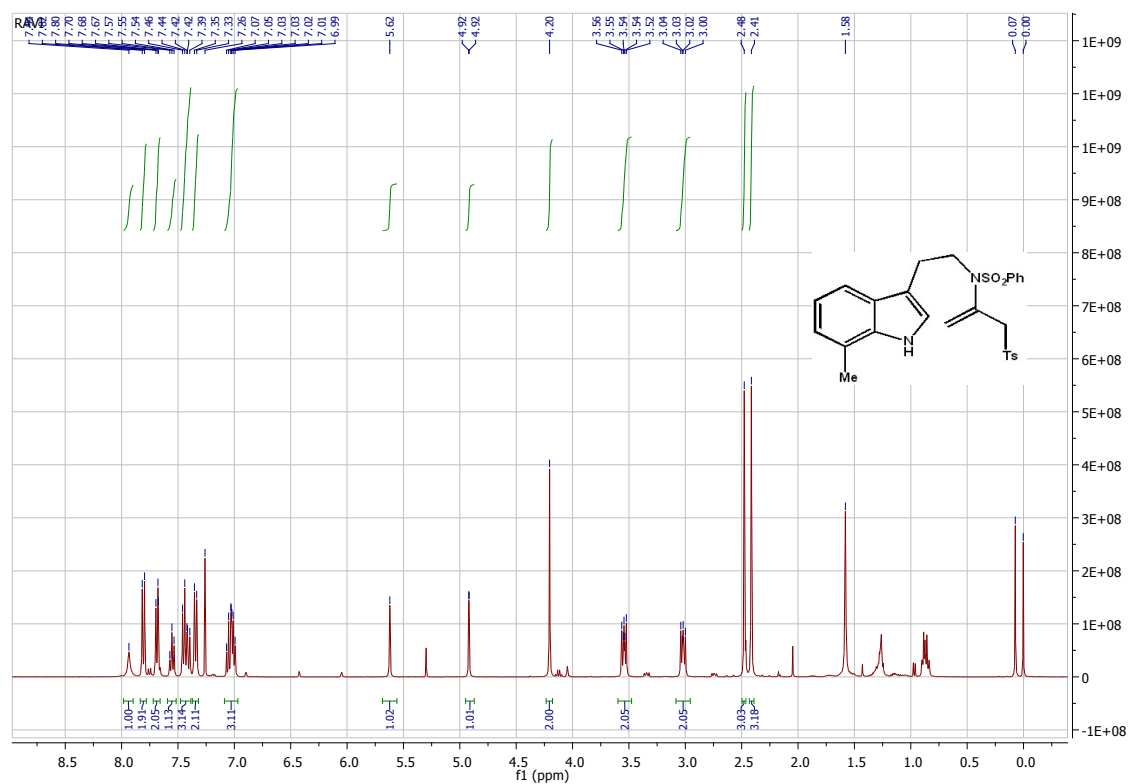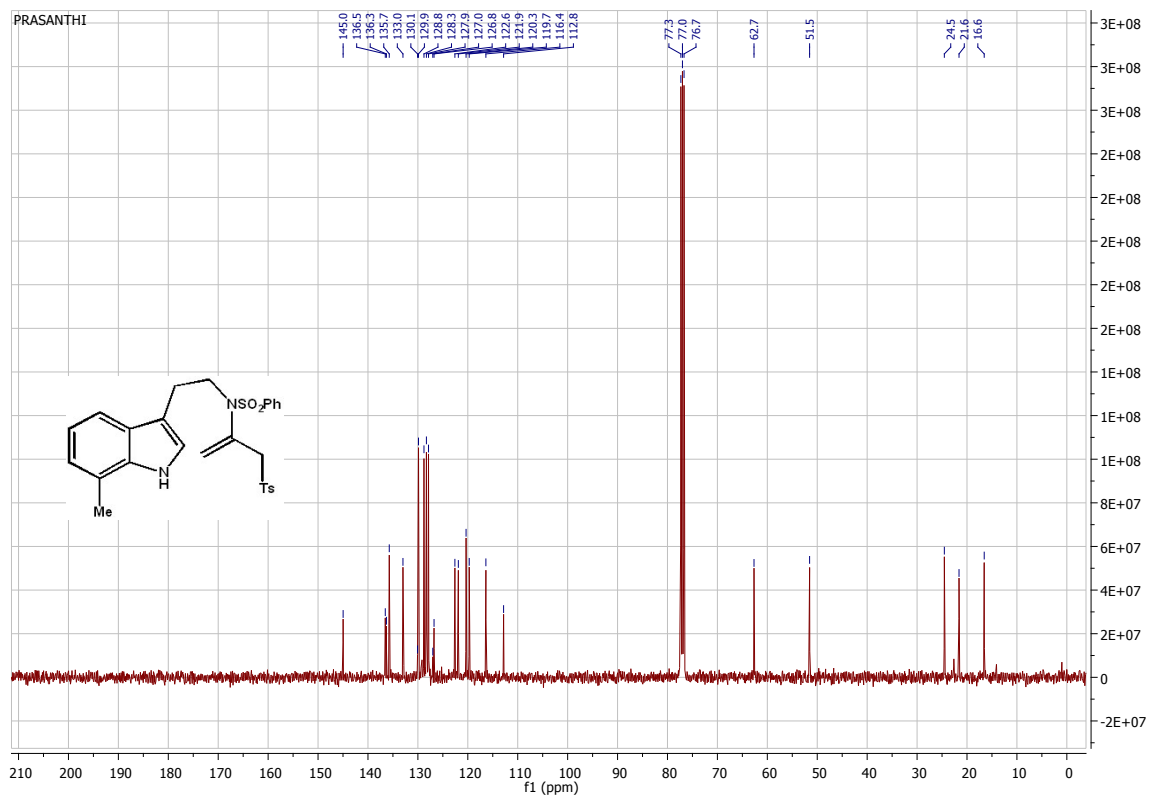

4g

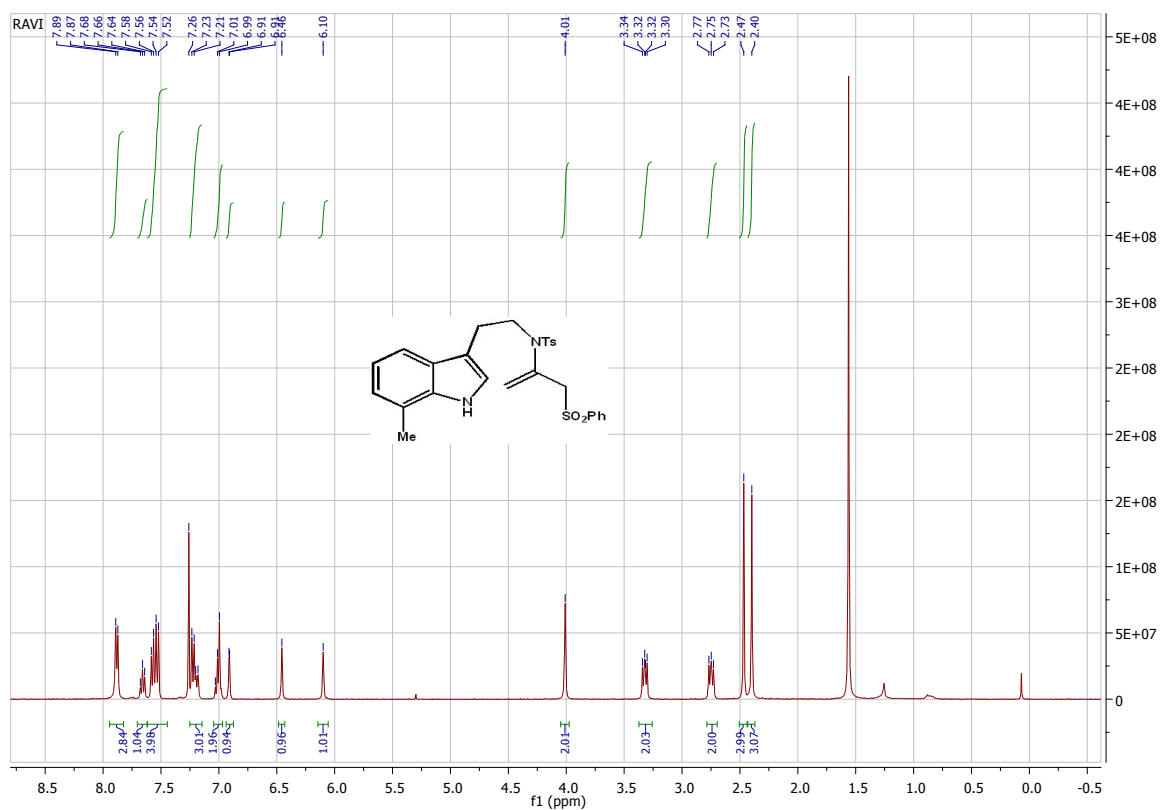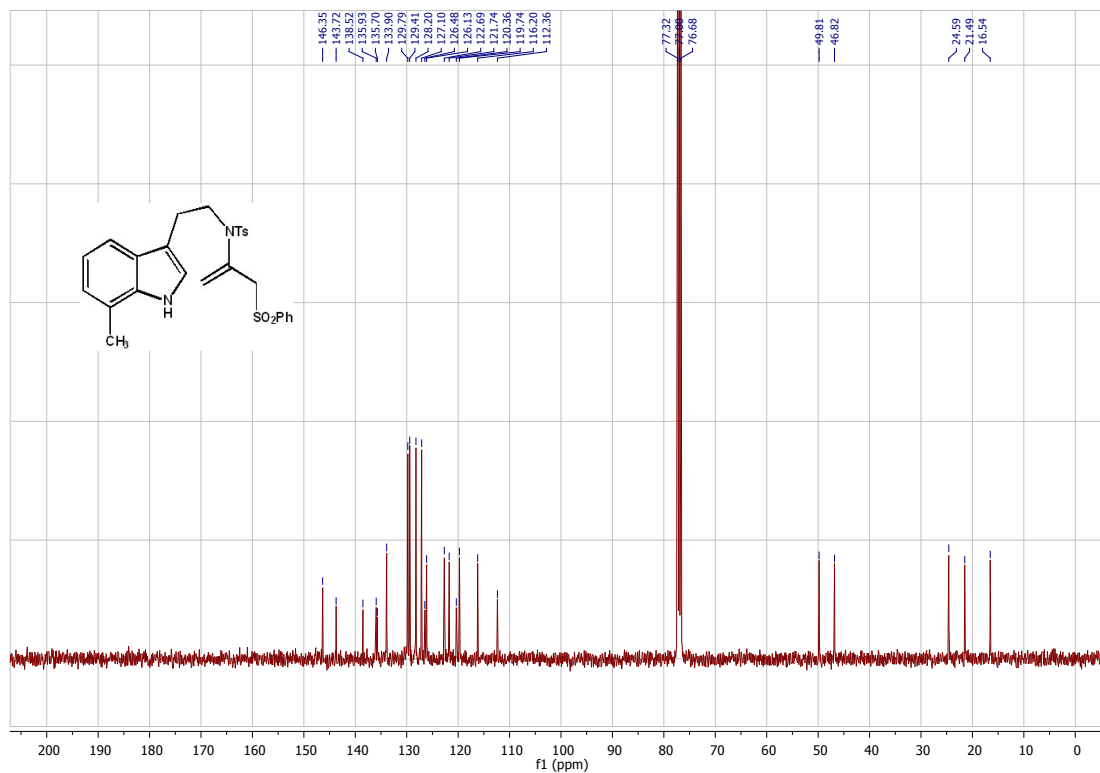

4h

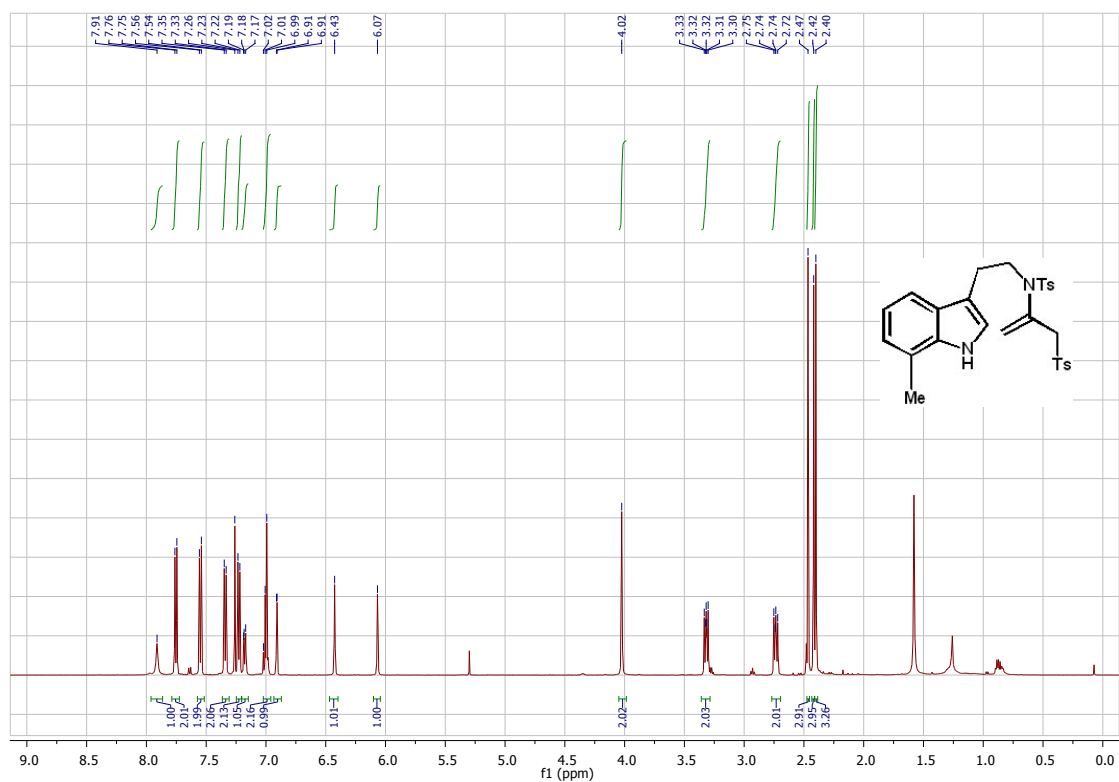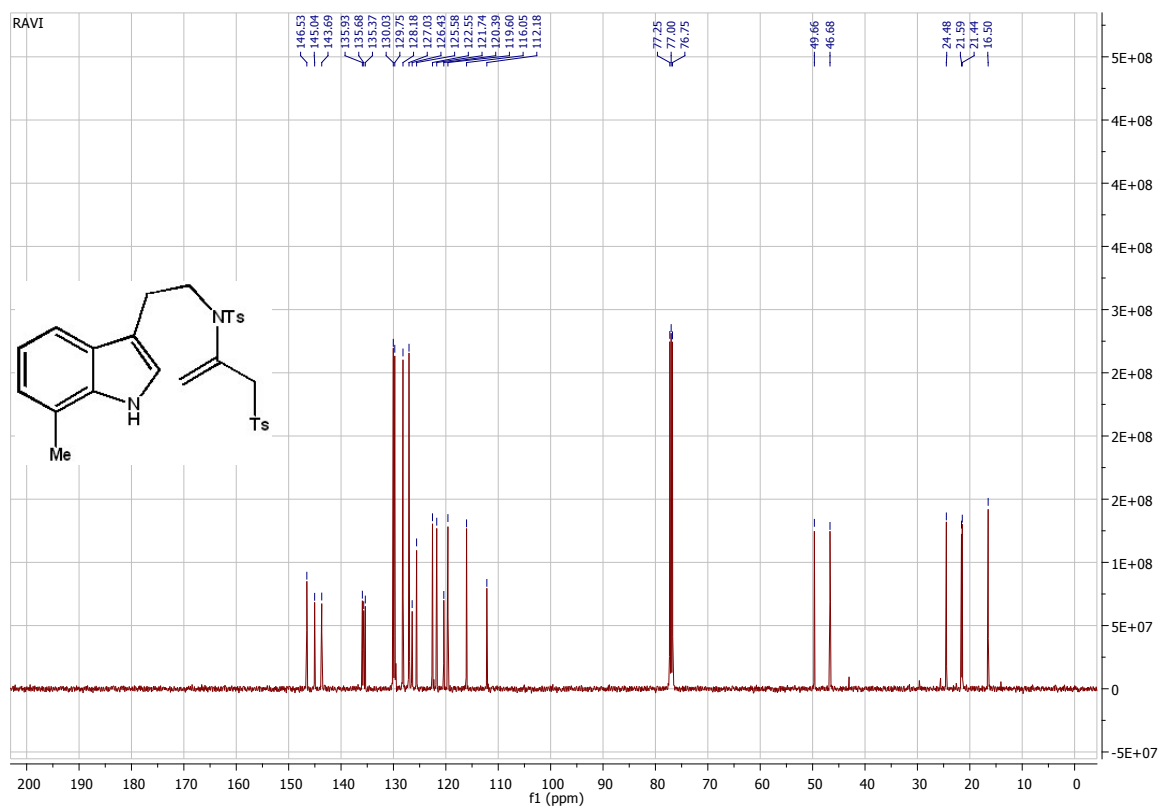

11

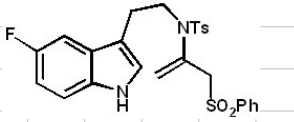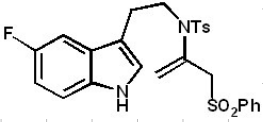

4j

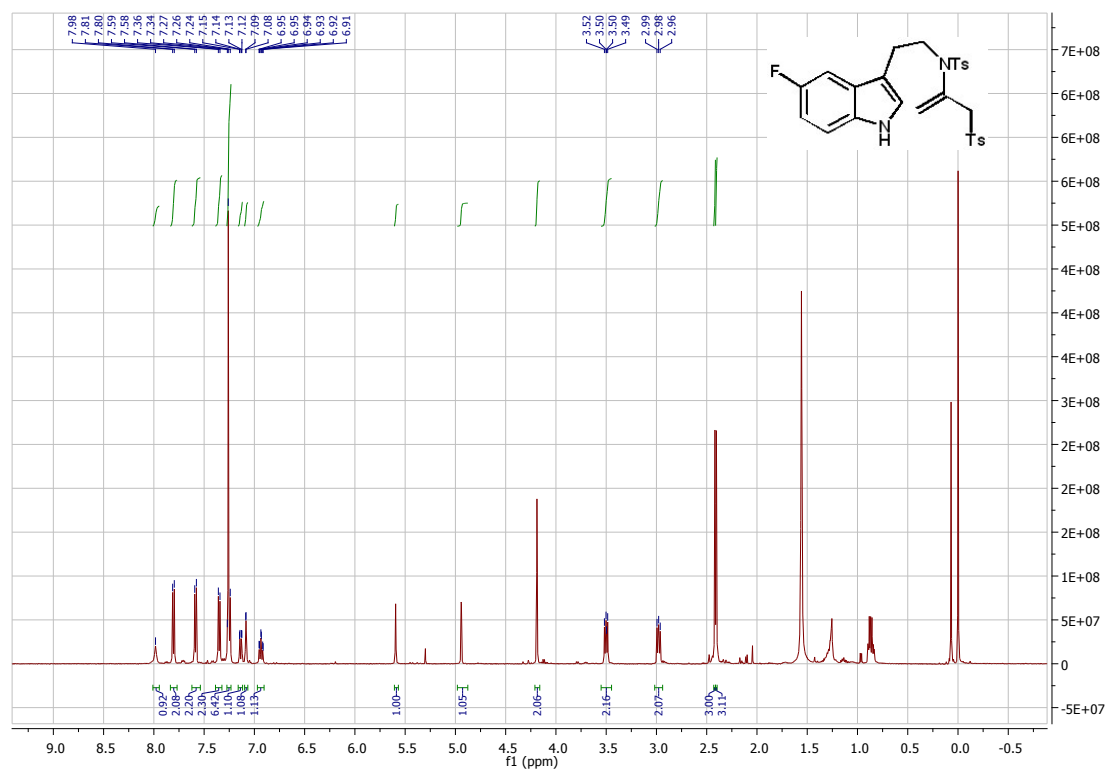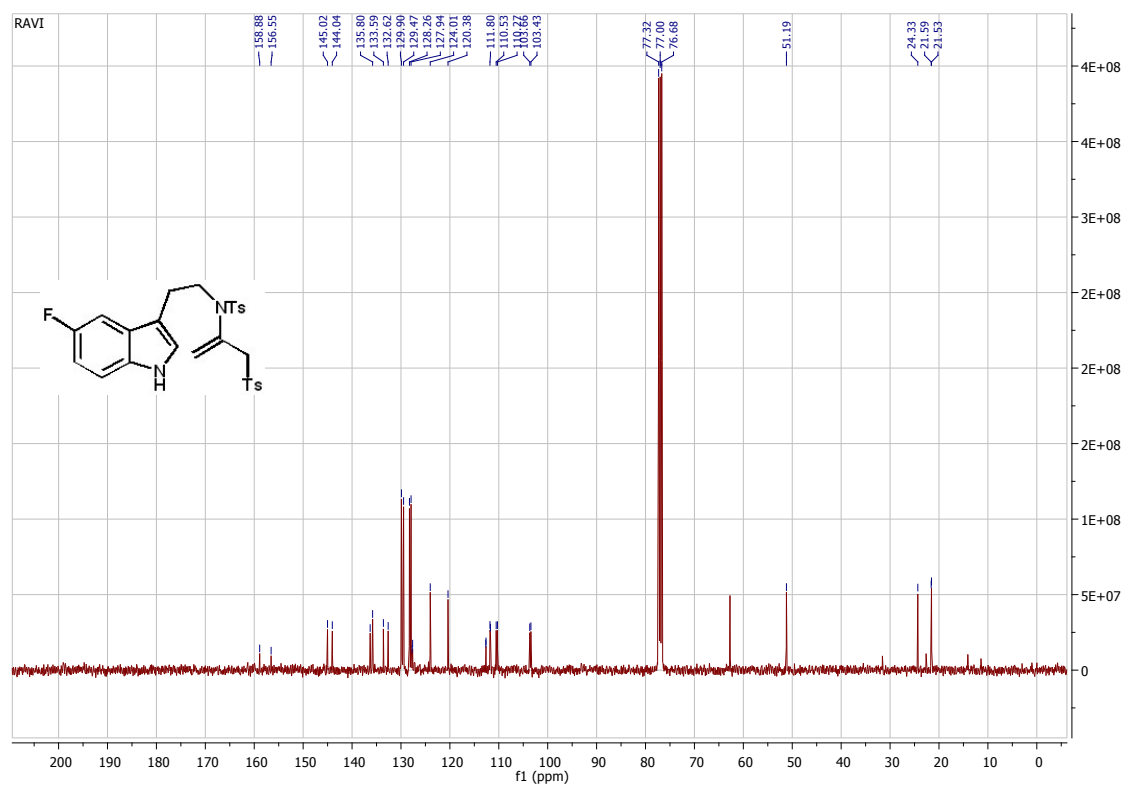

4k

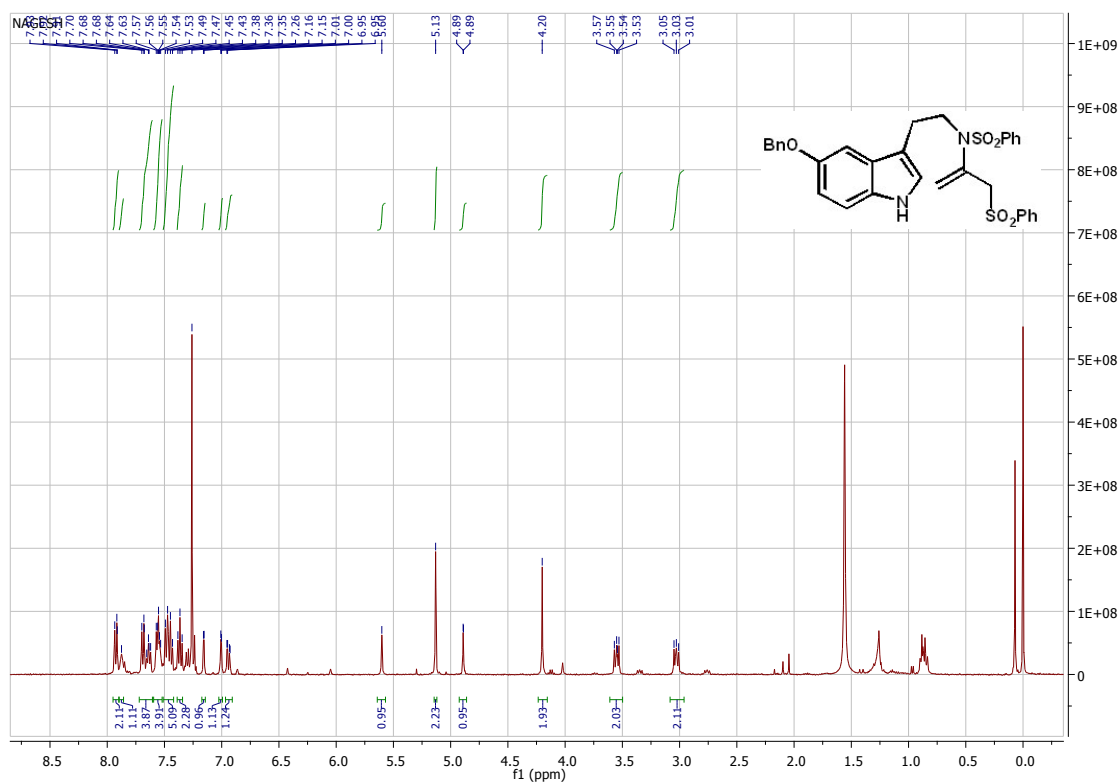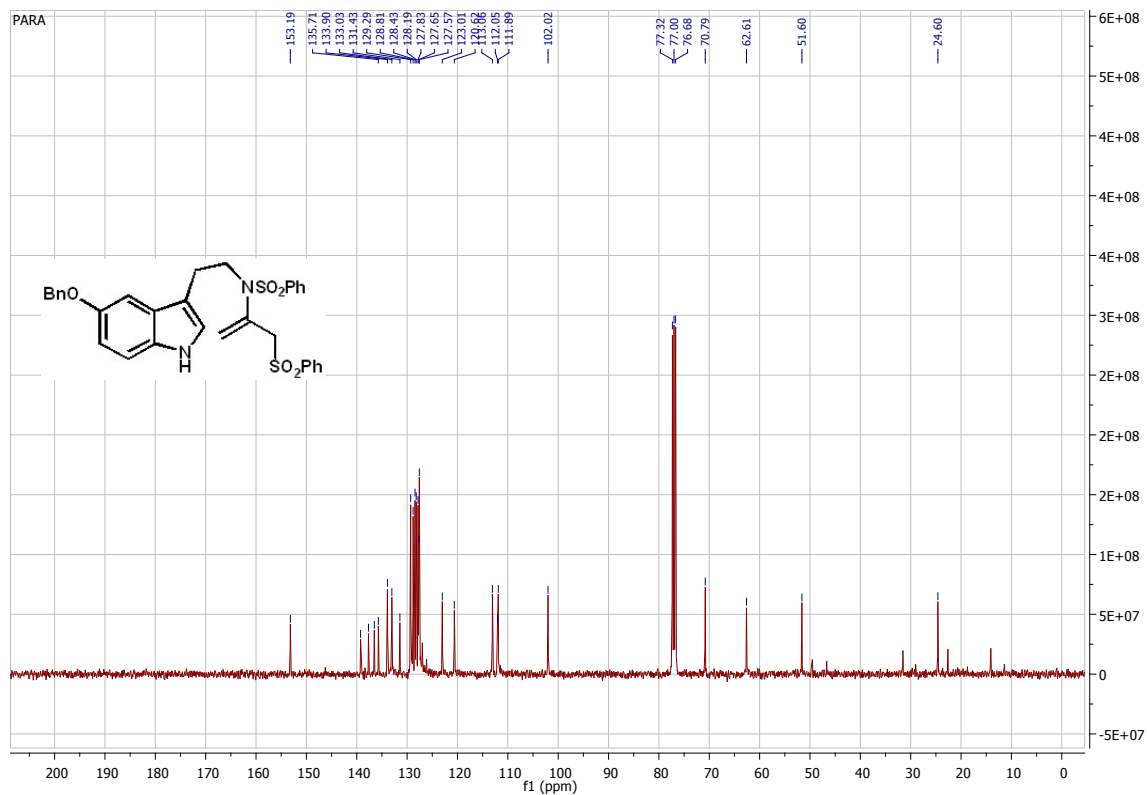

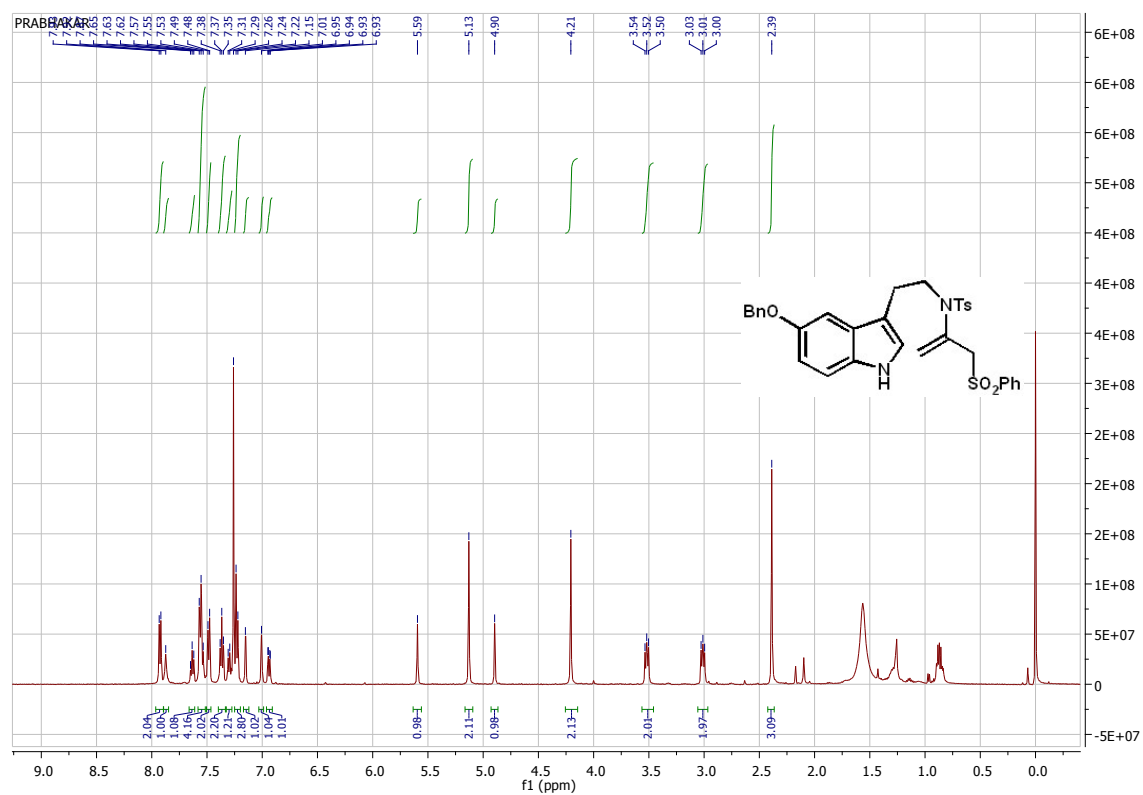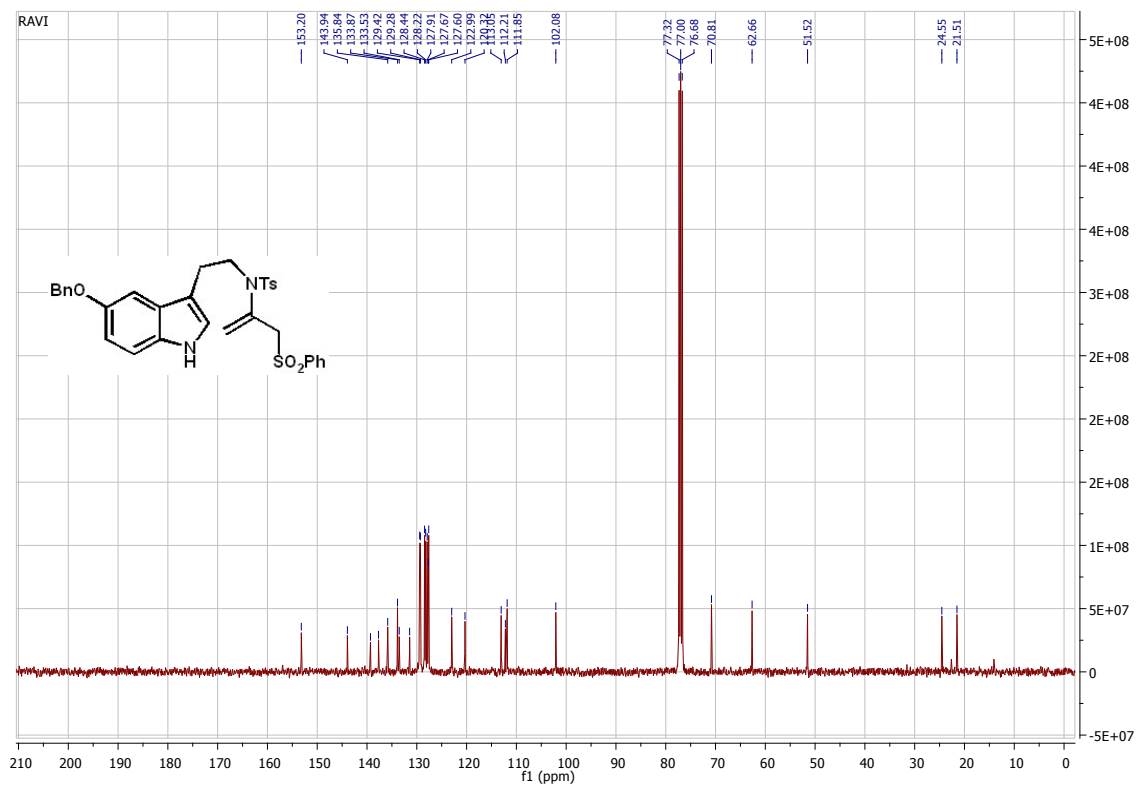

4m

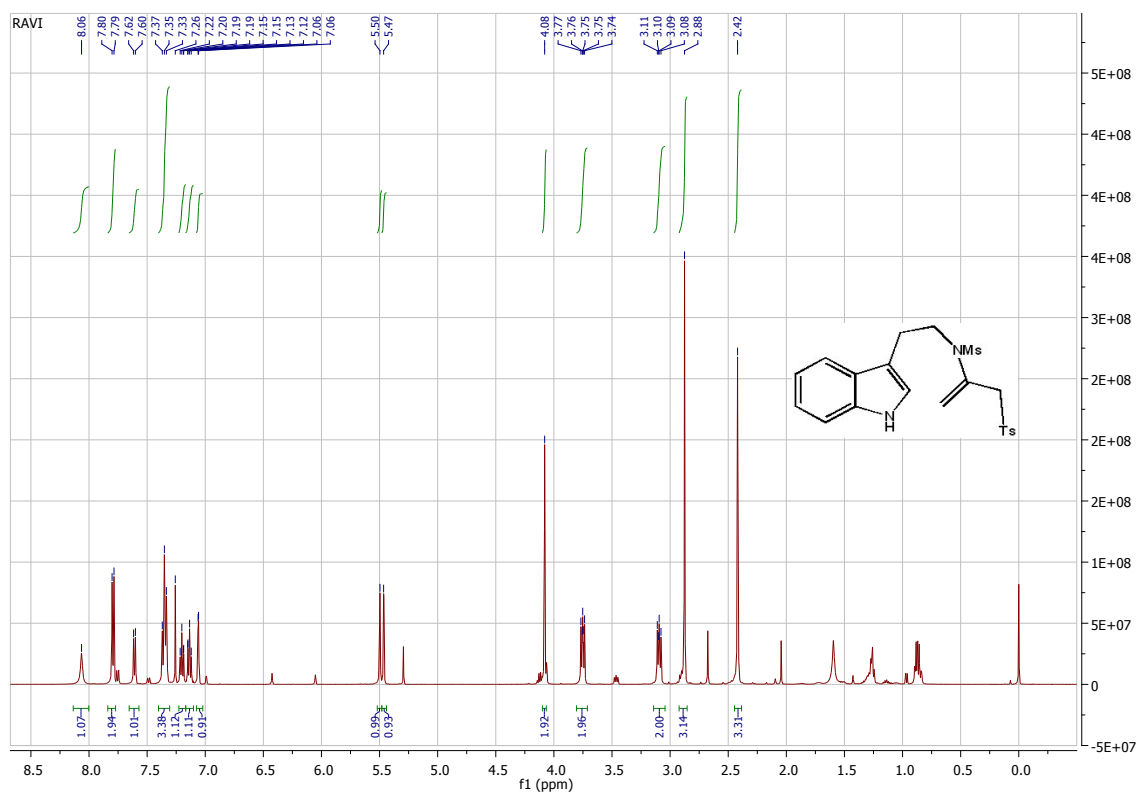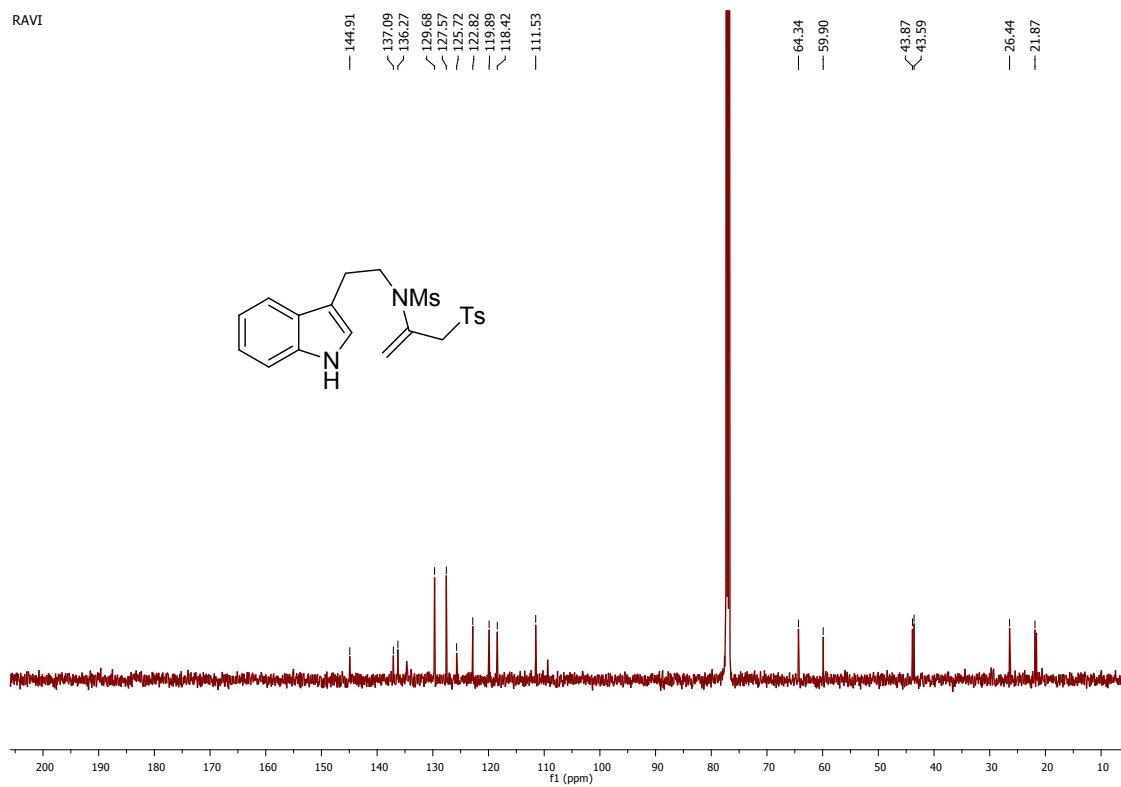

5a

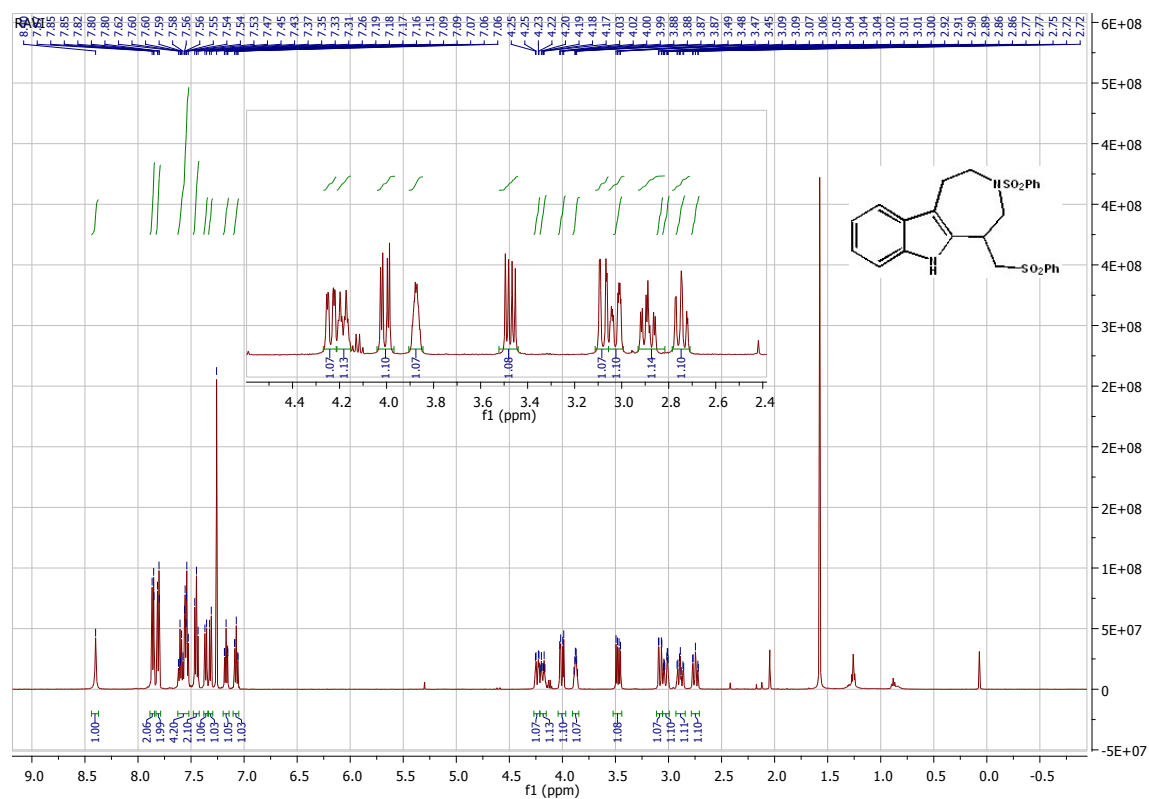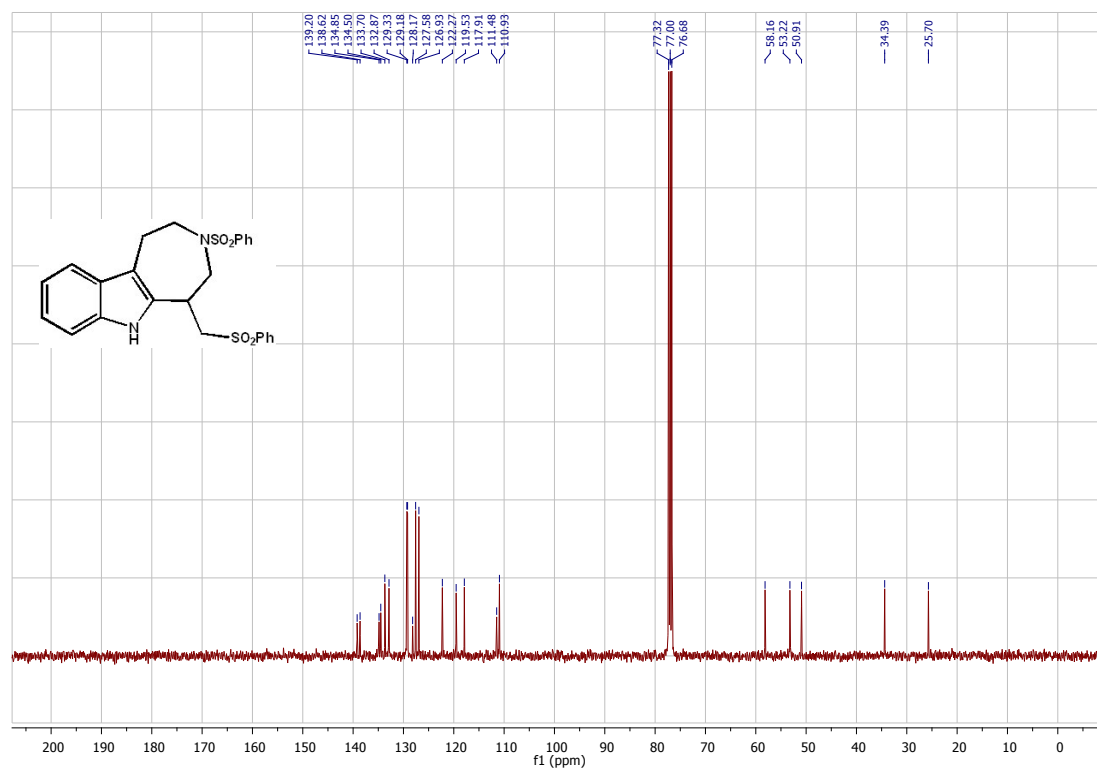

5b

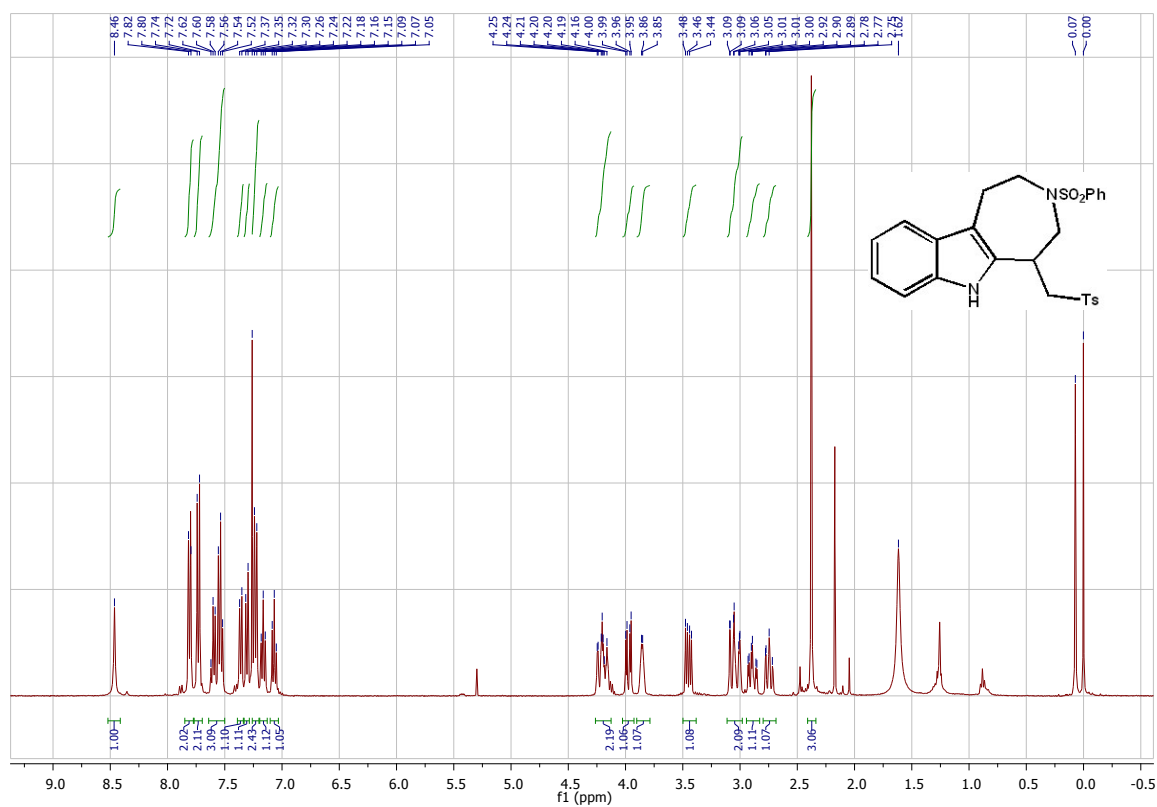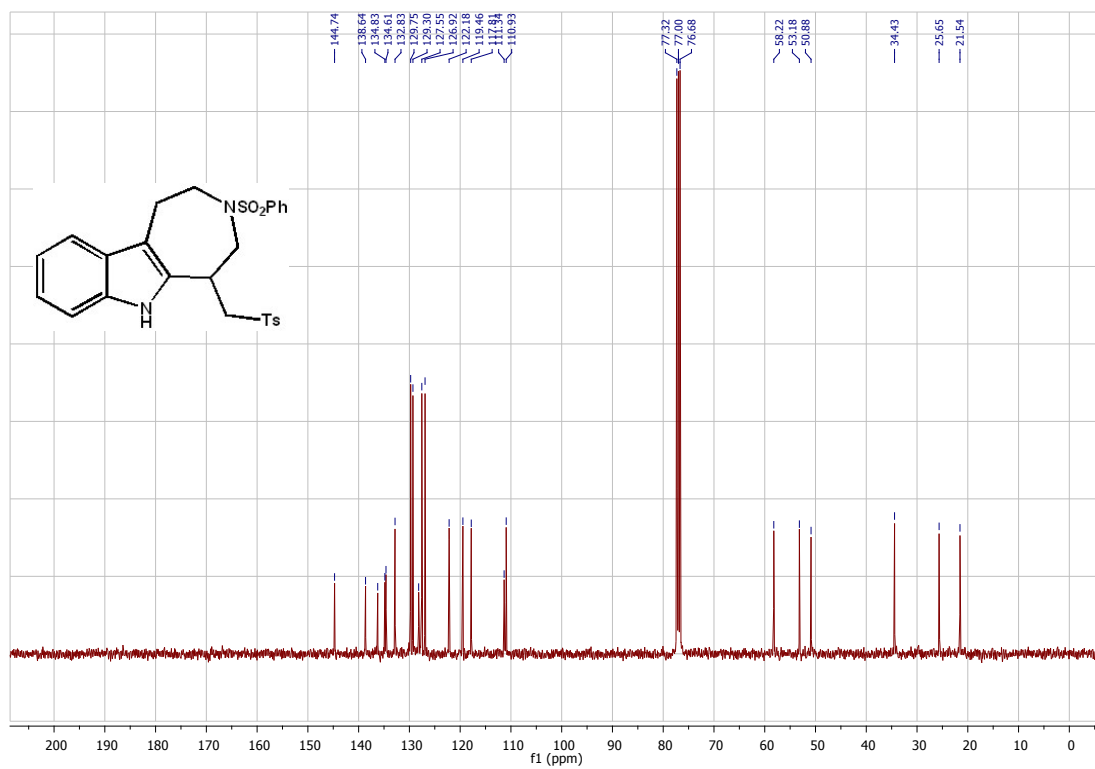

5c

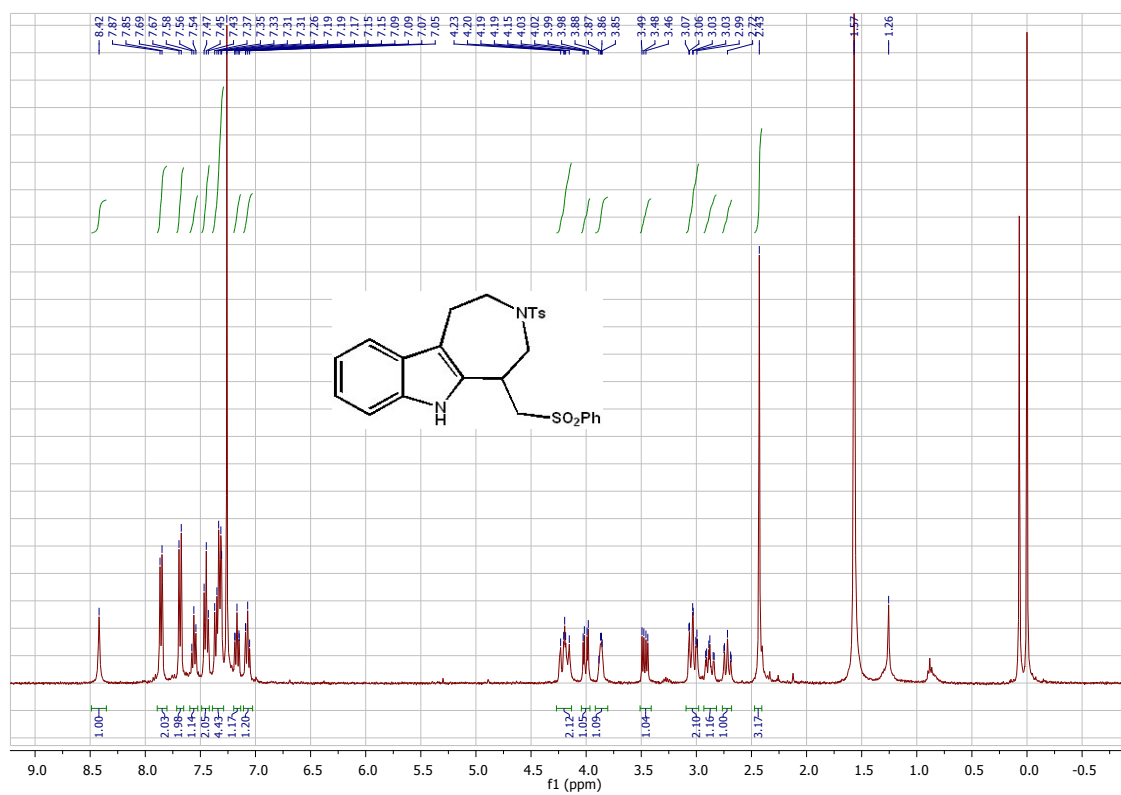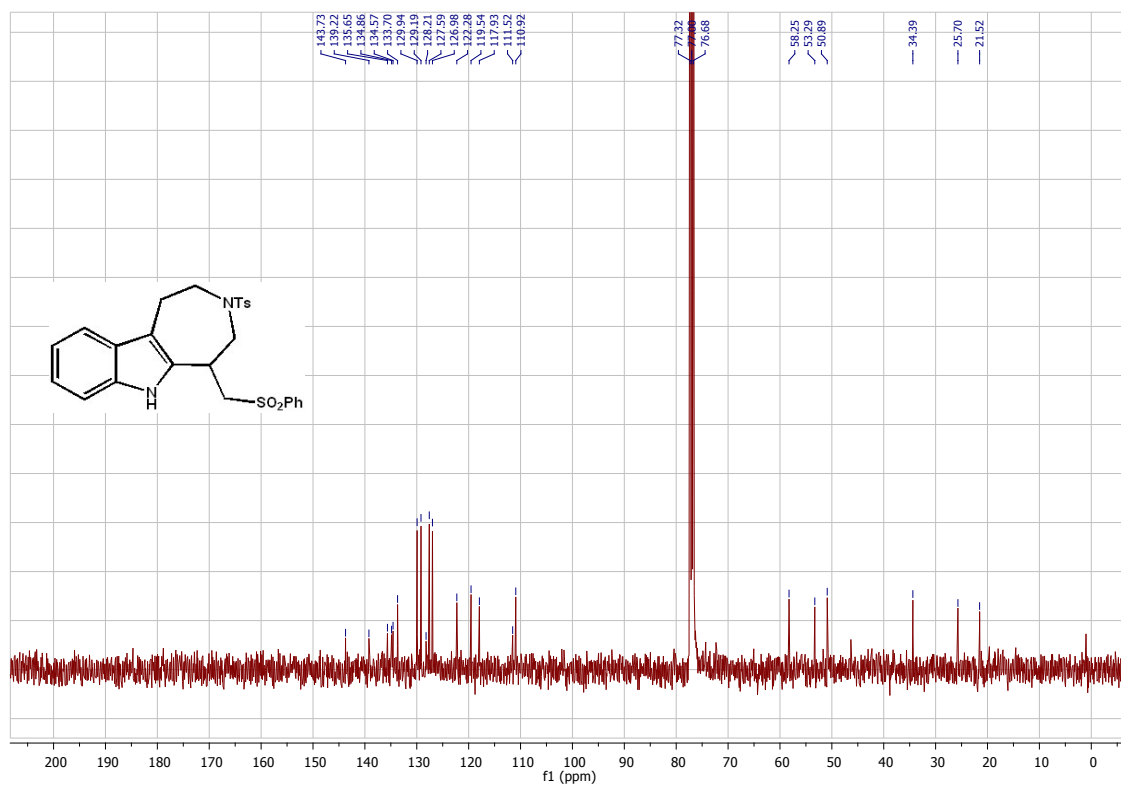

5d

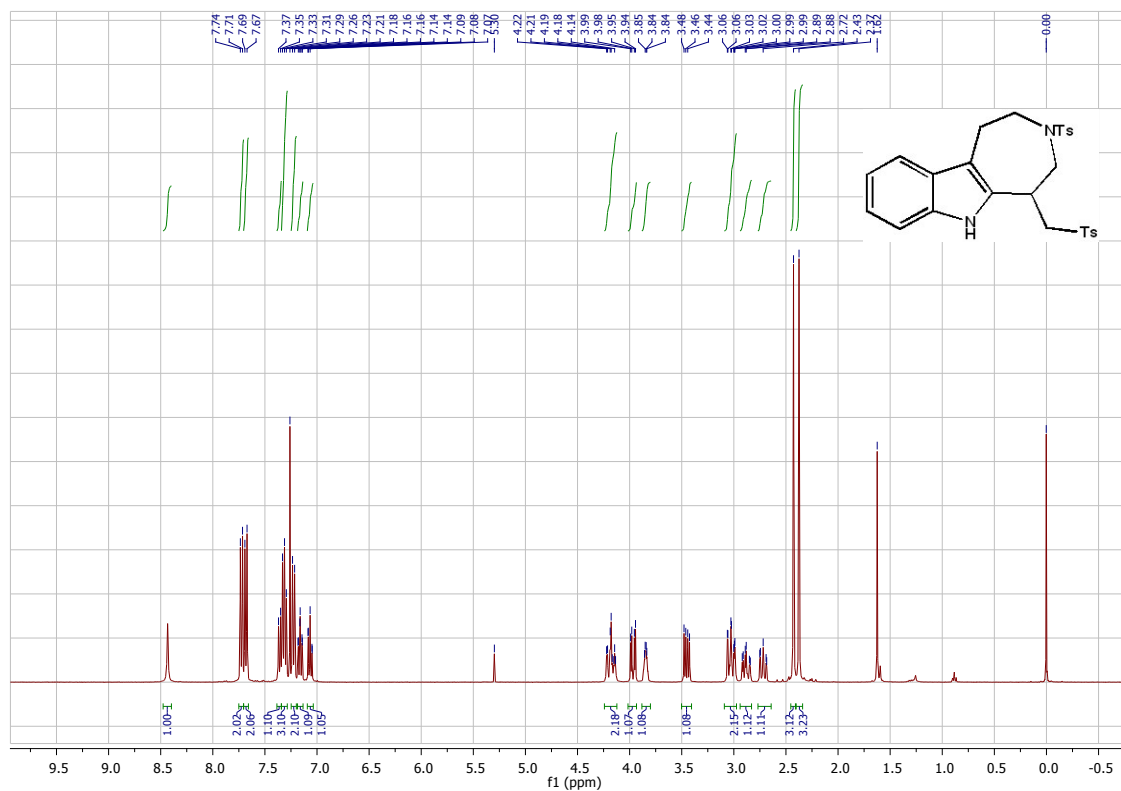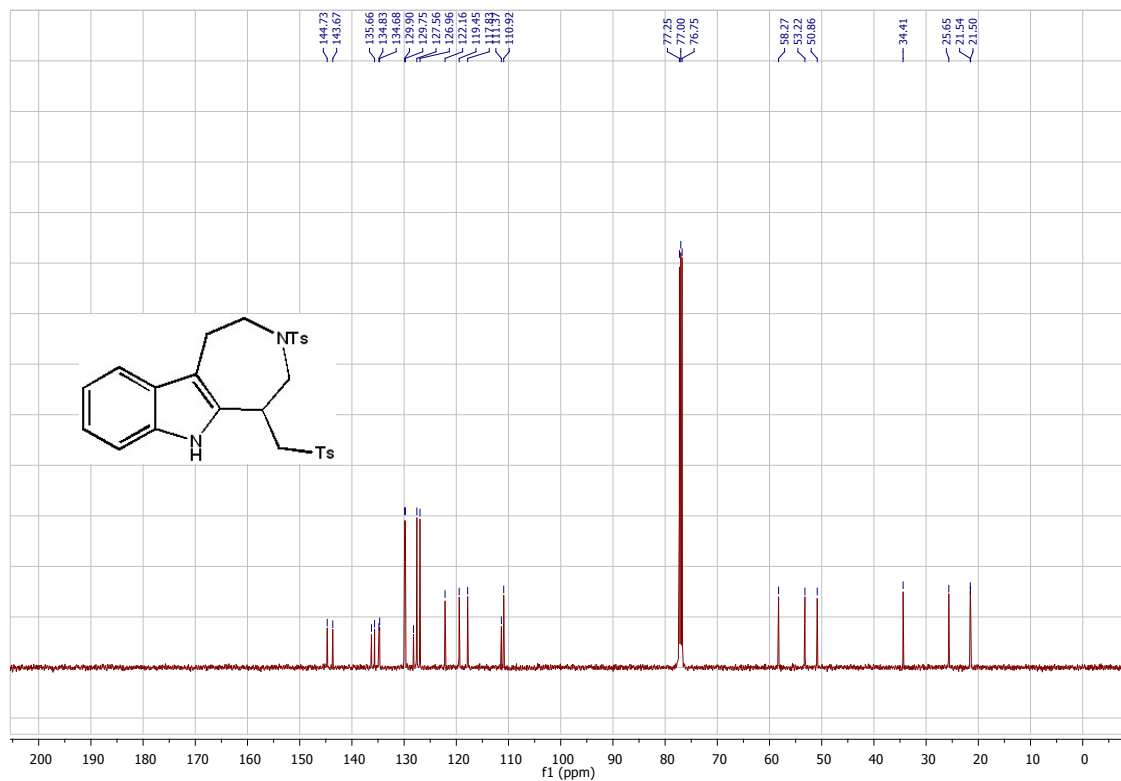

5e

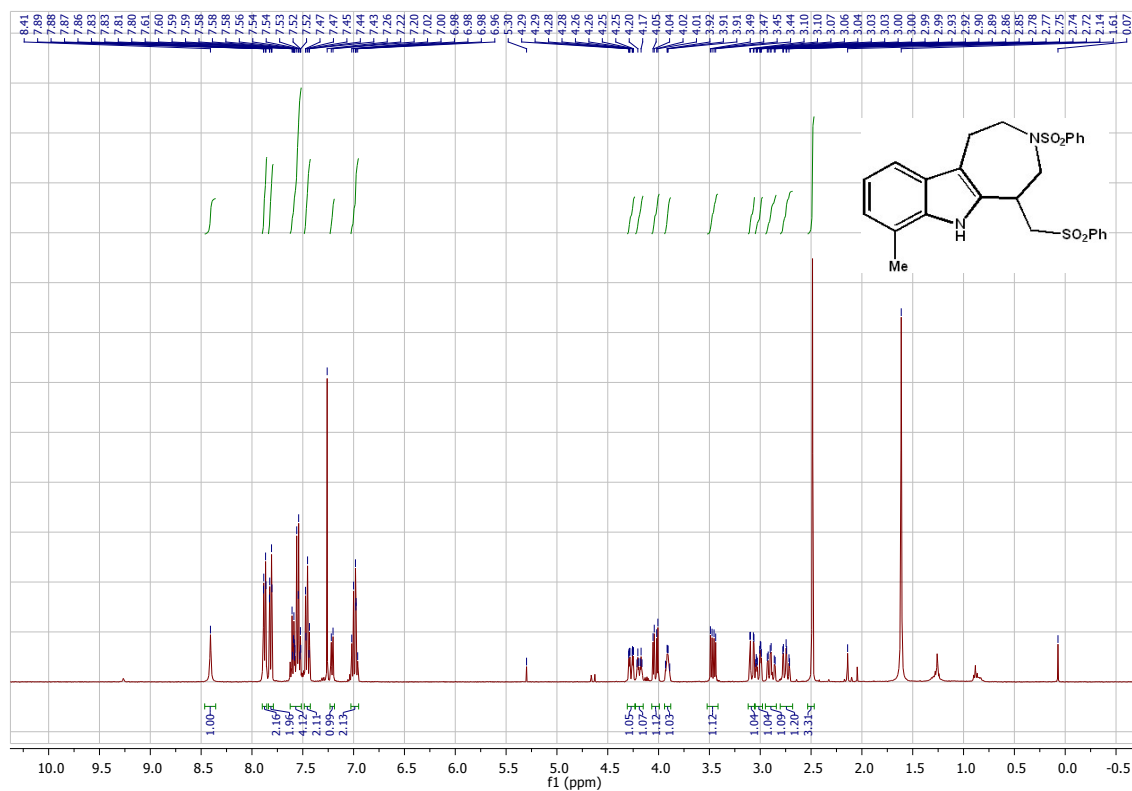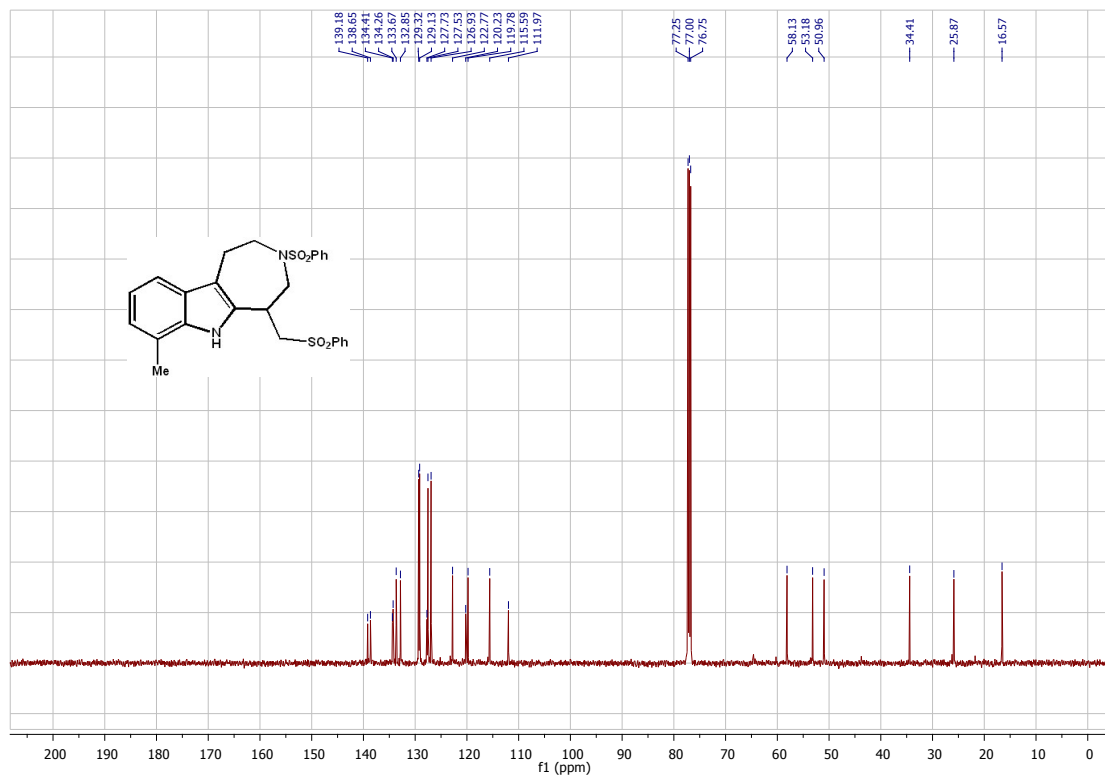

5f

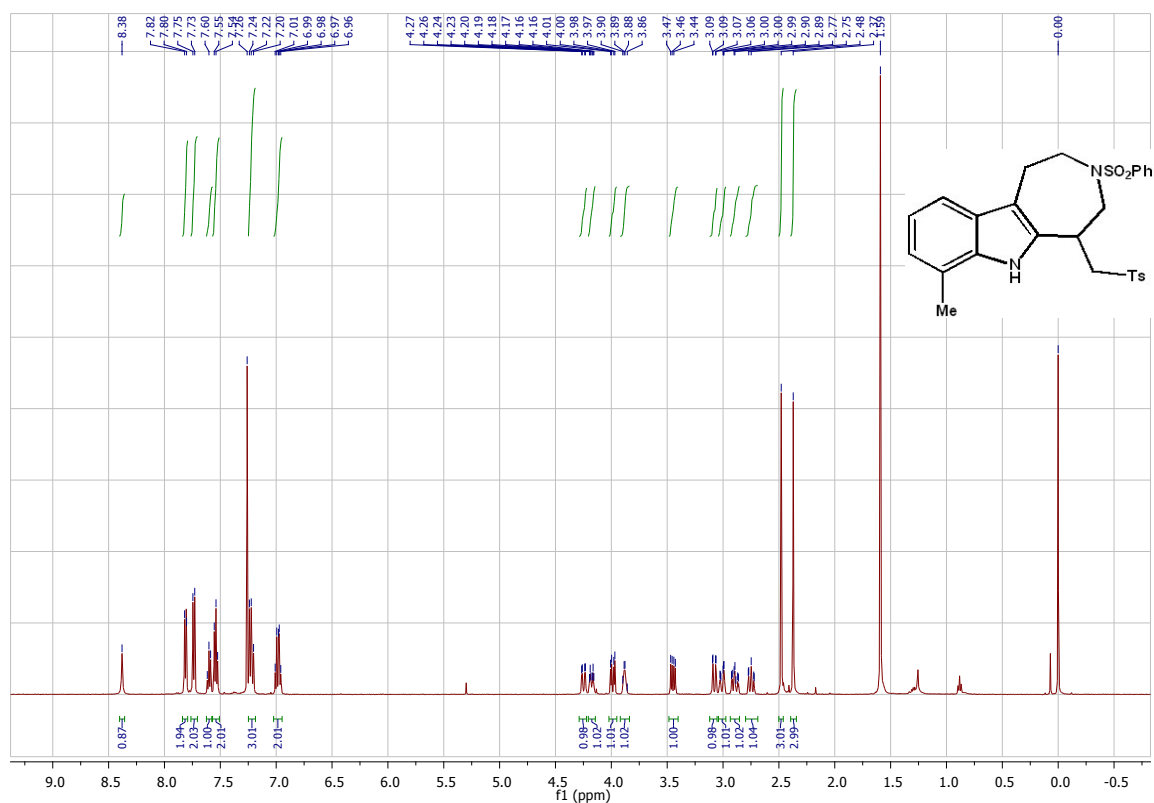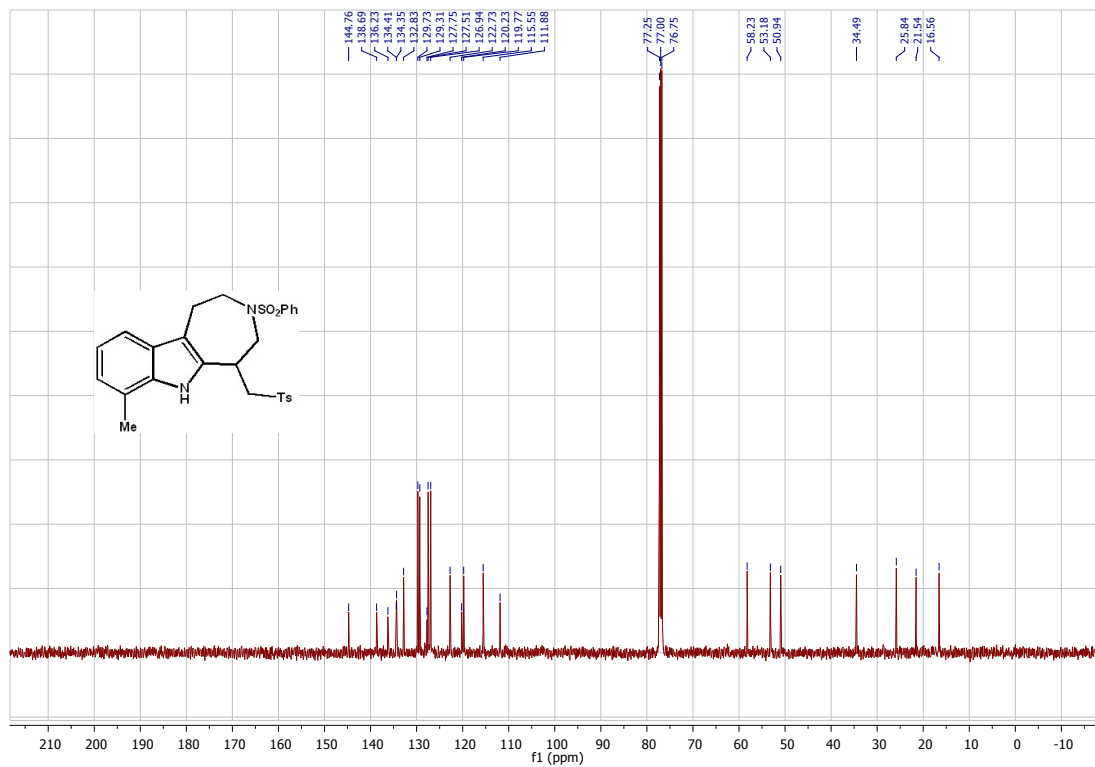

5g

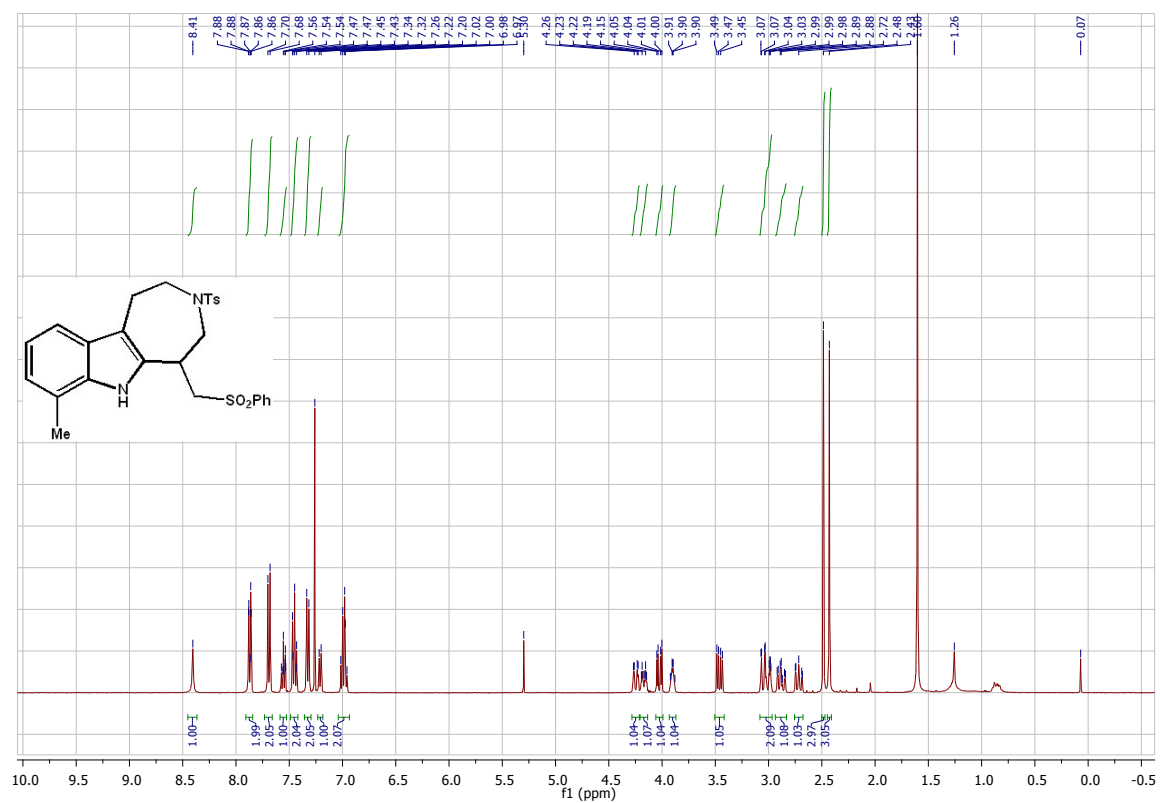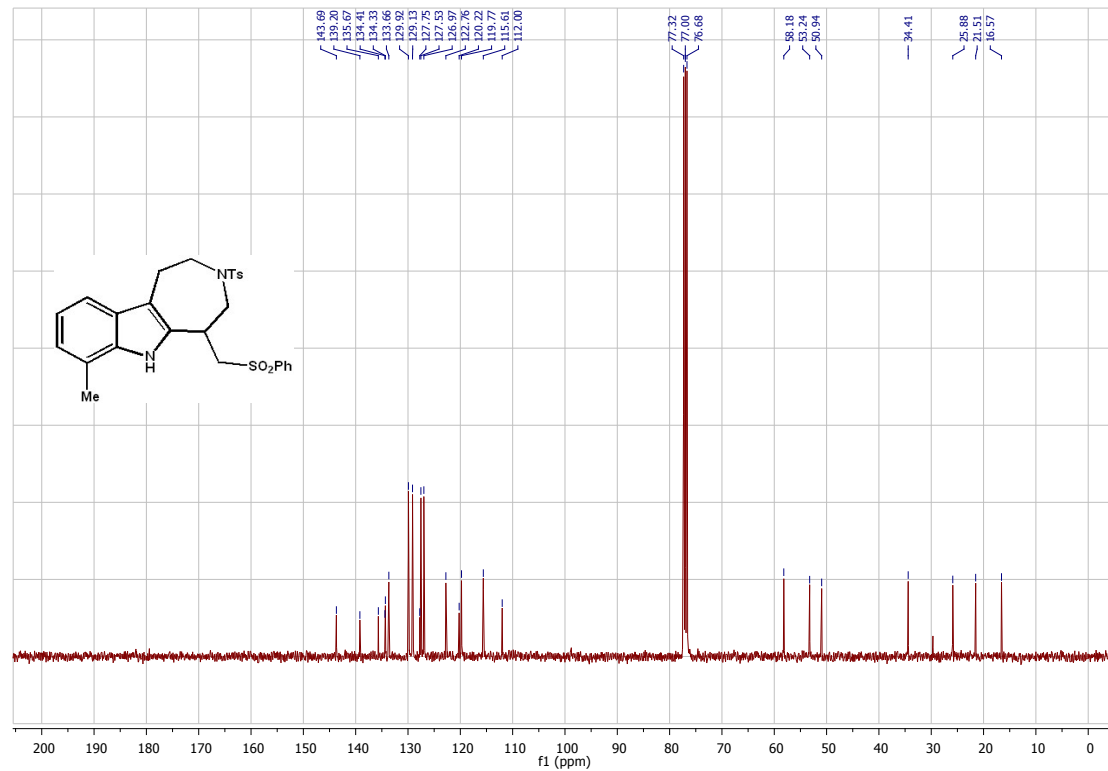

5h

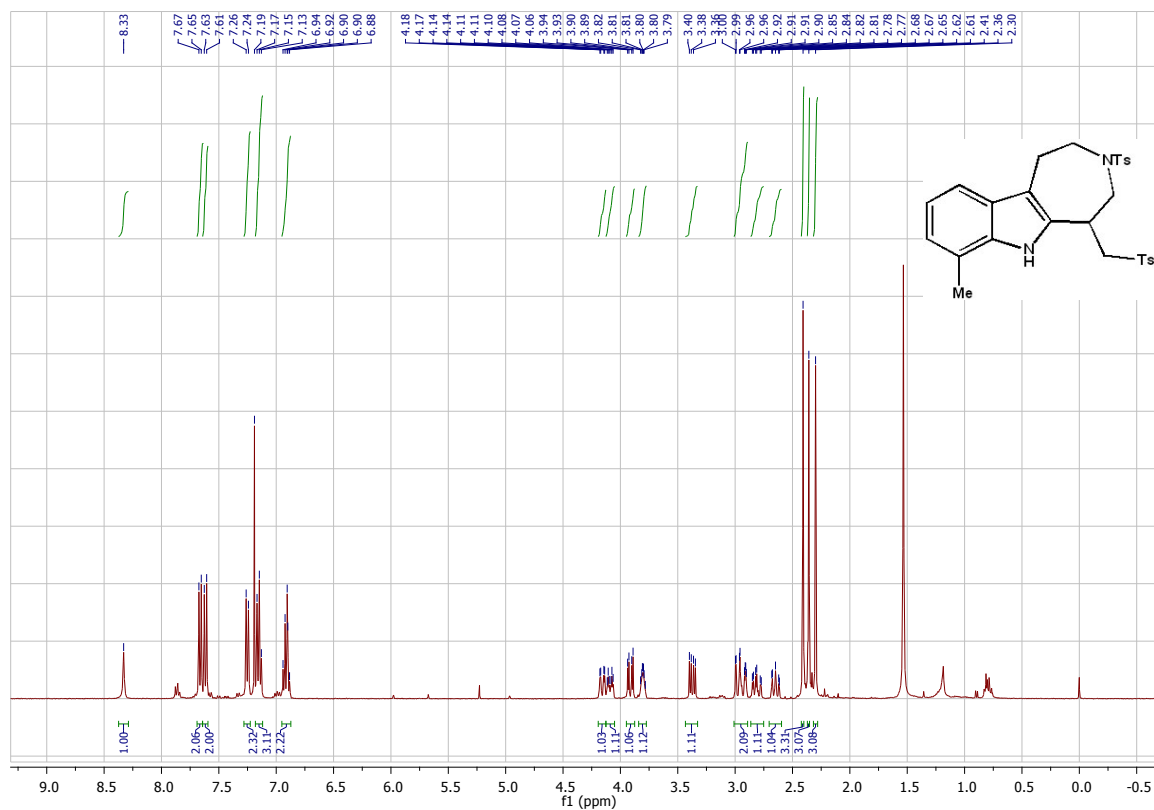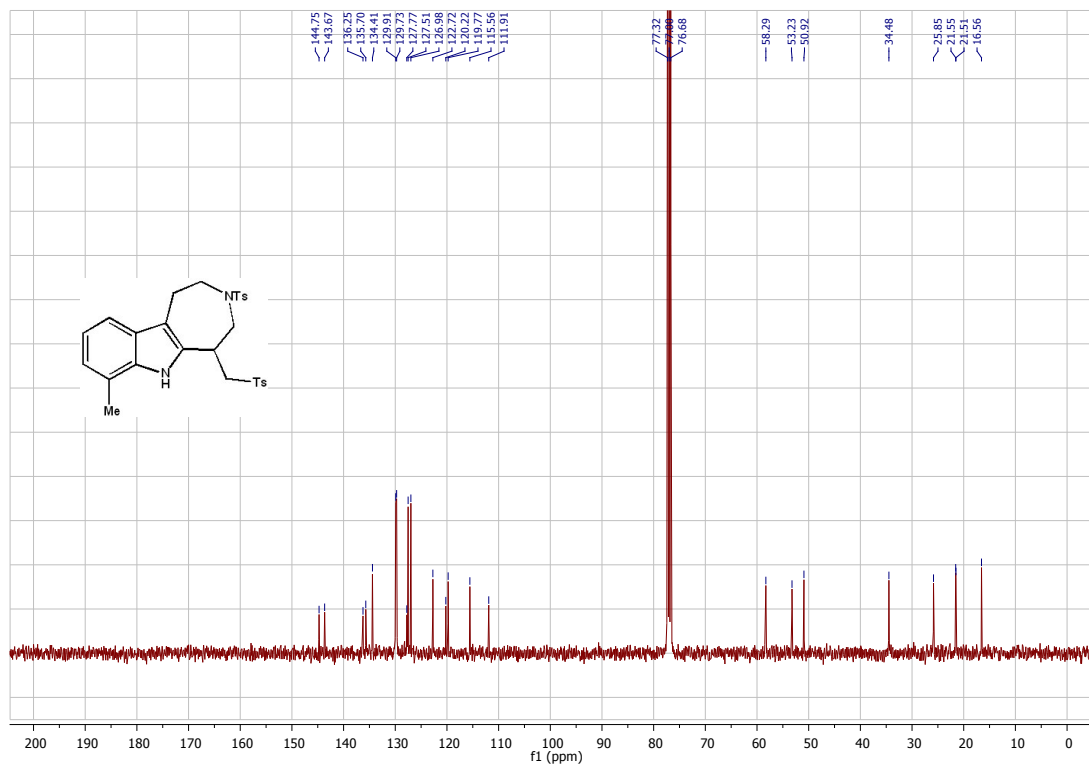

5i

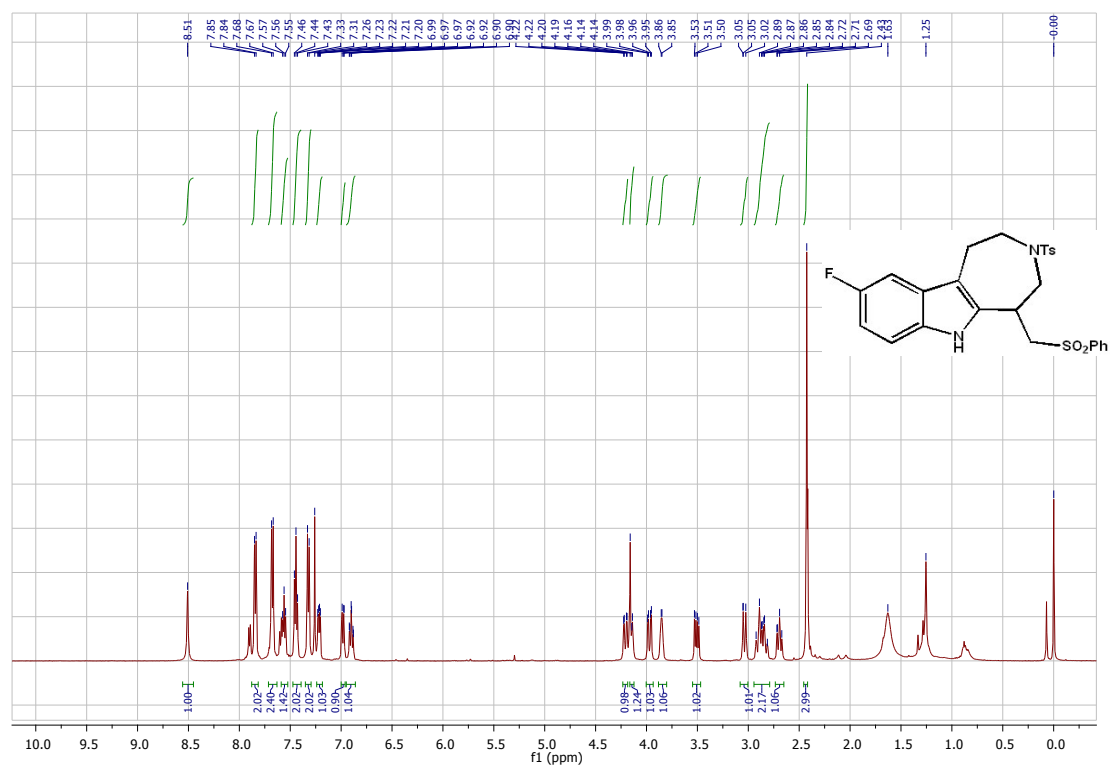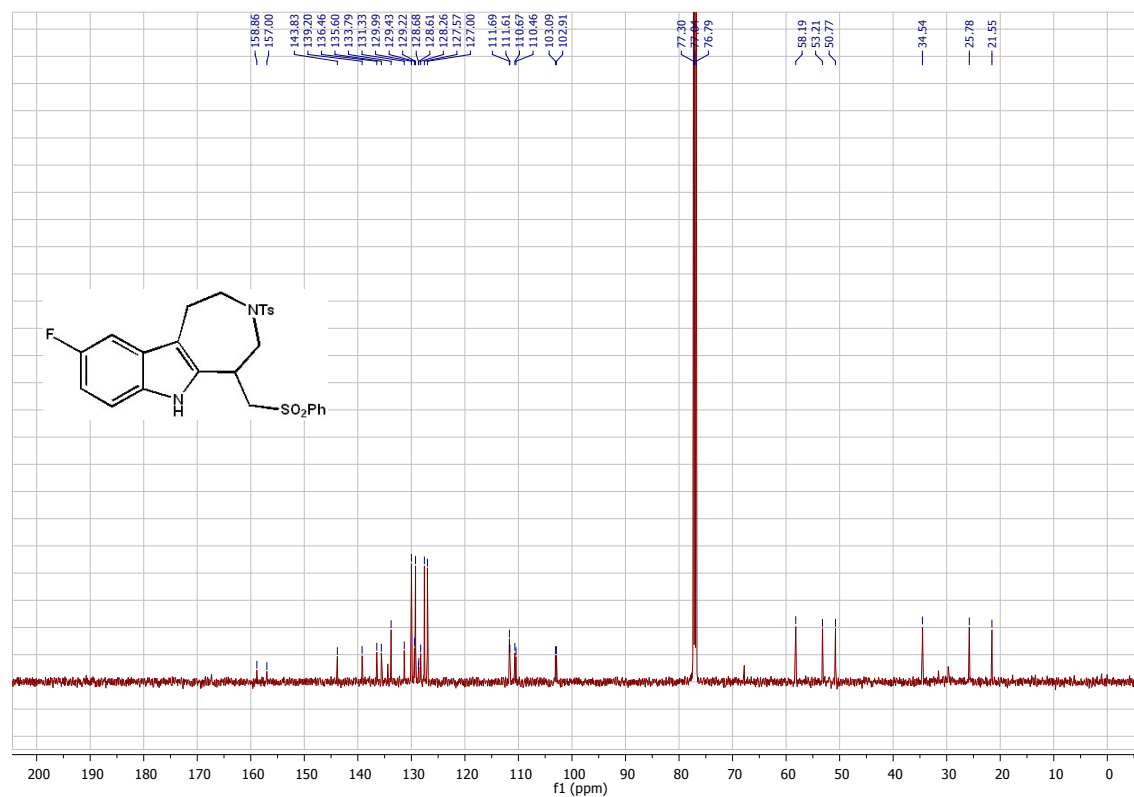

5j

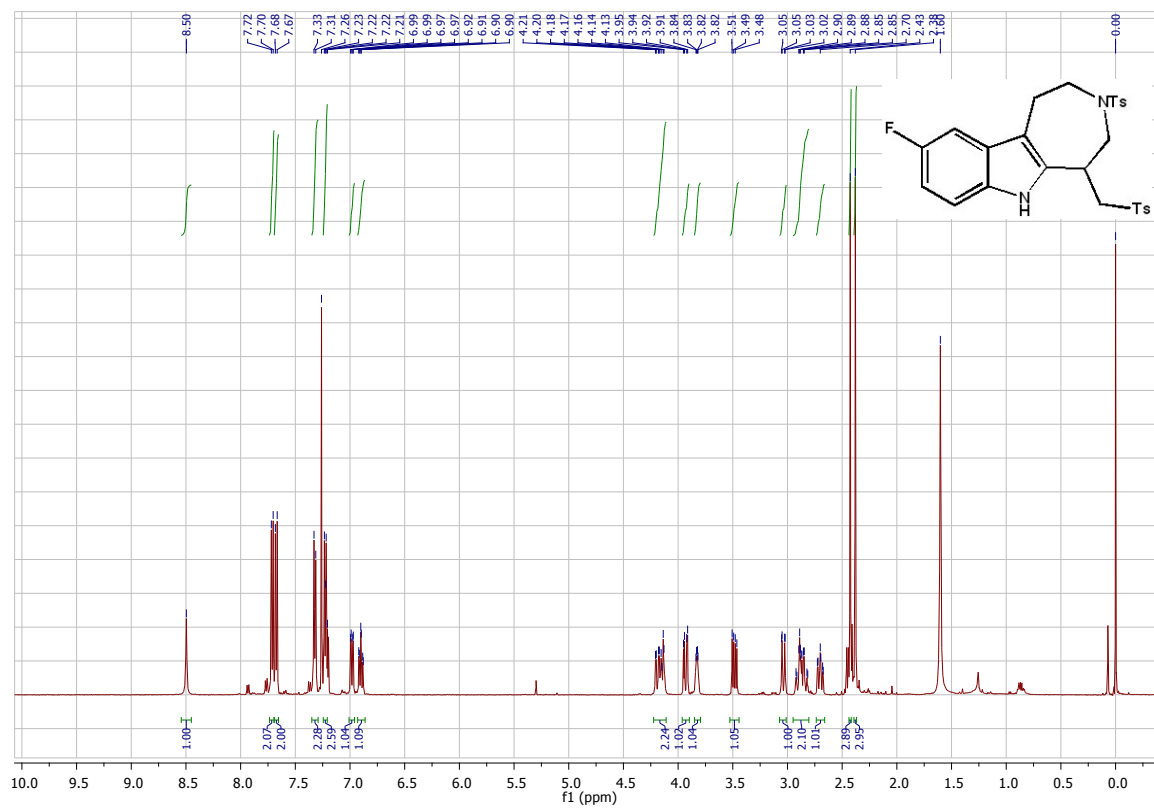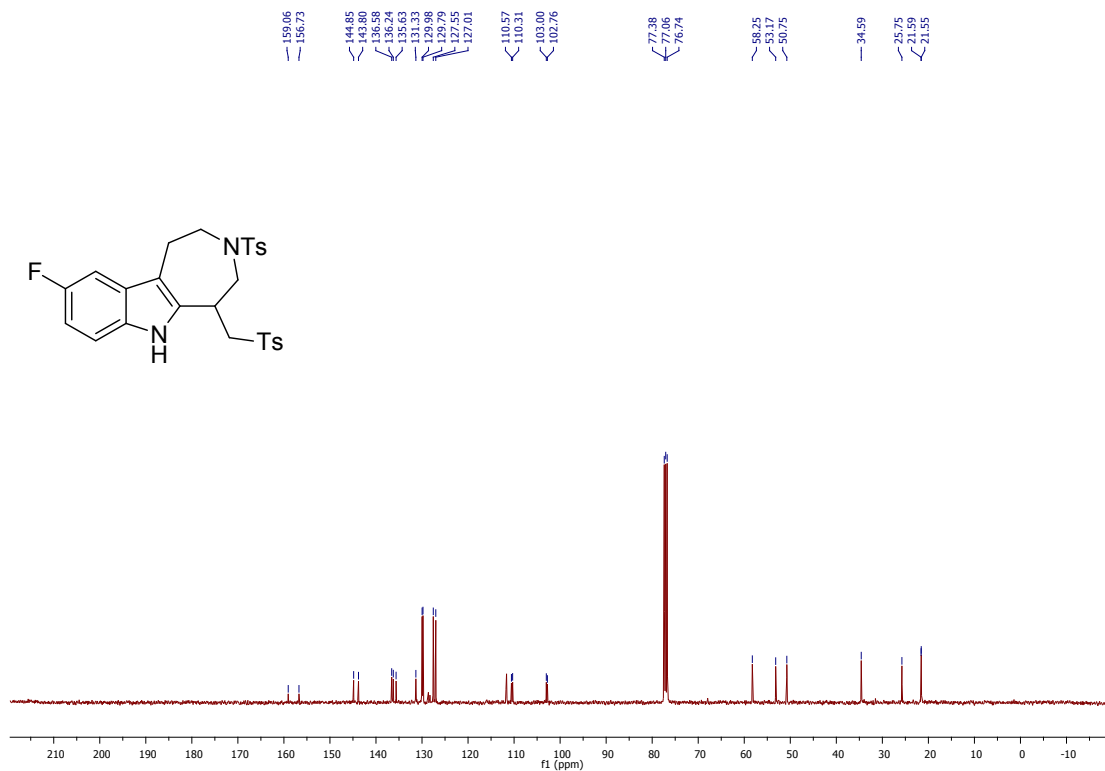

5k

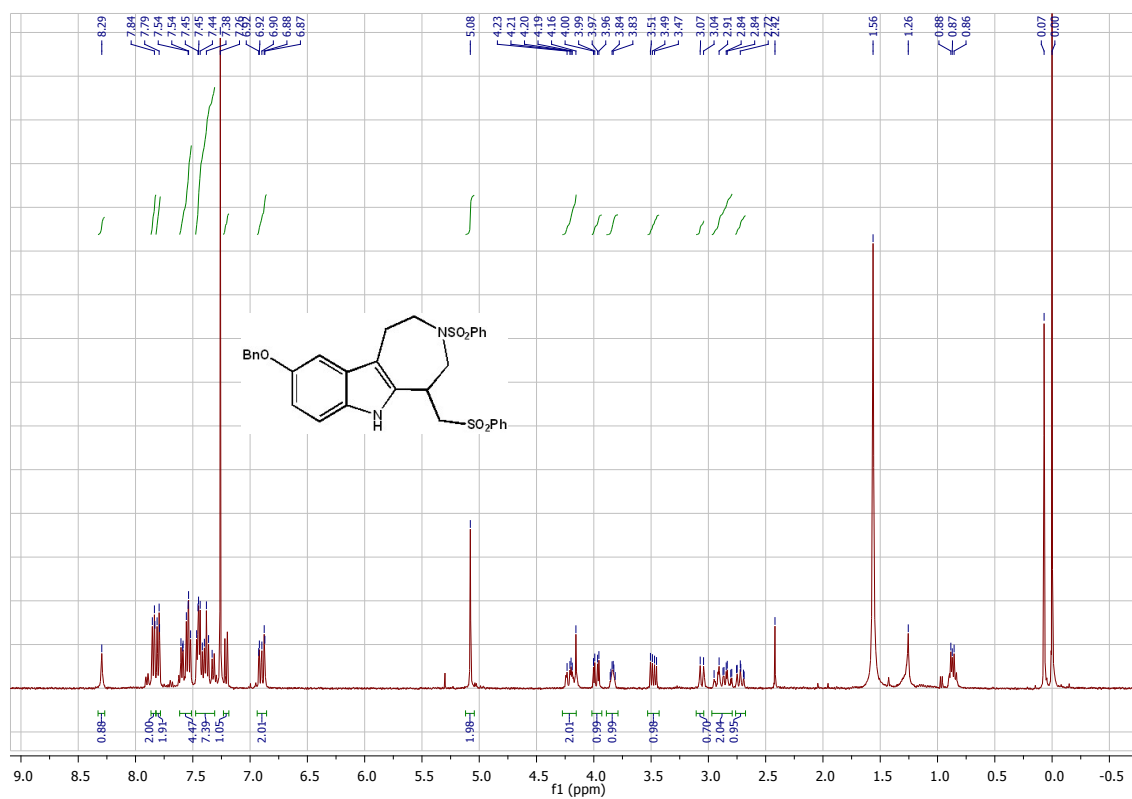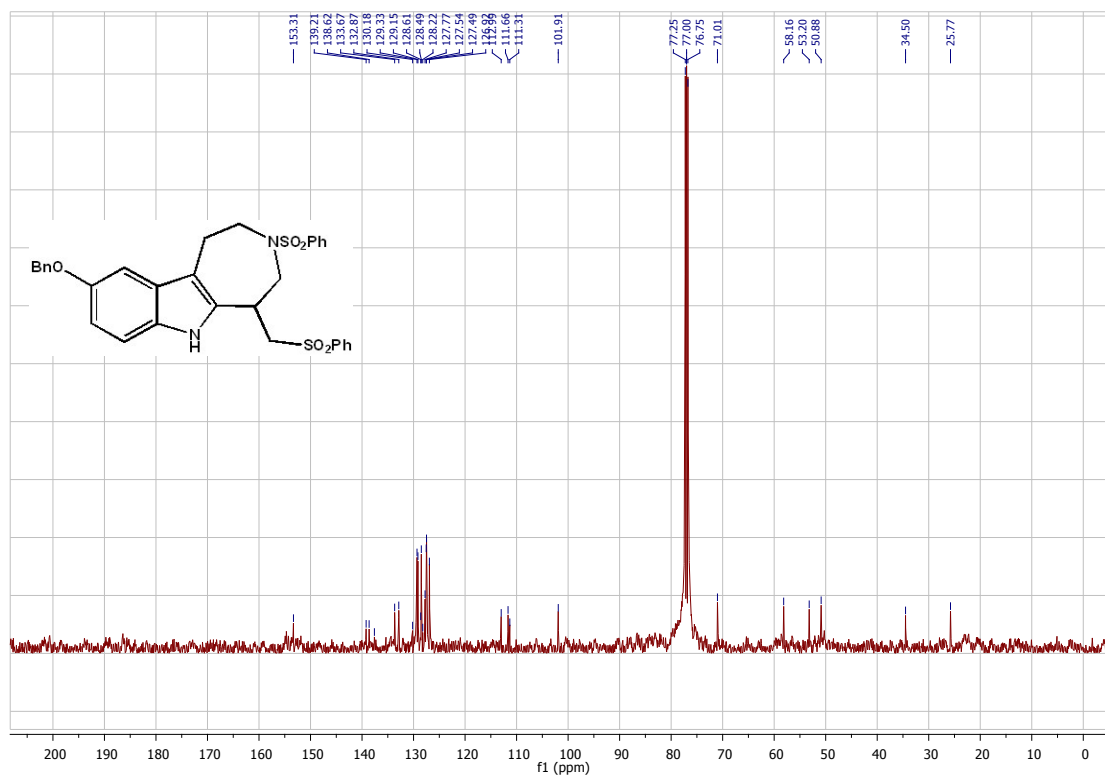

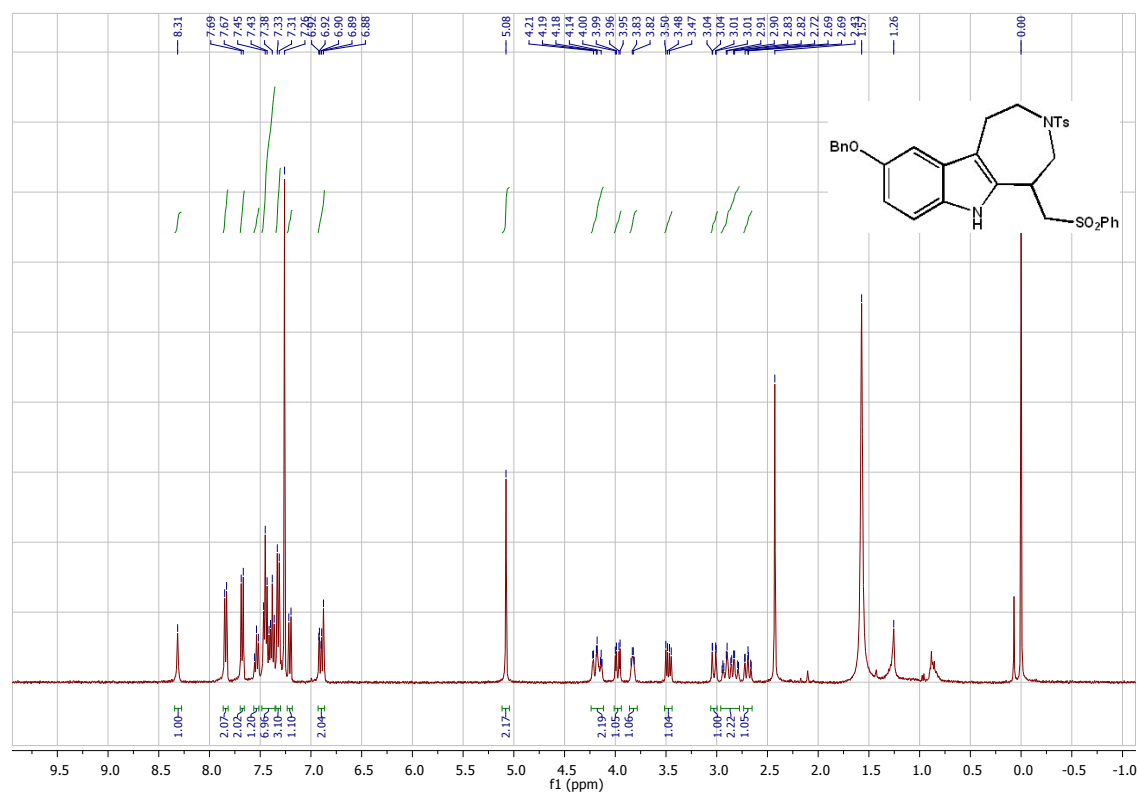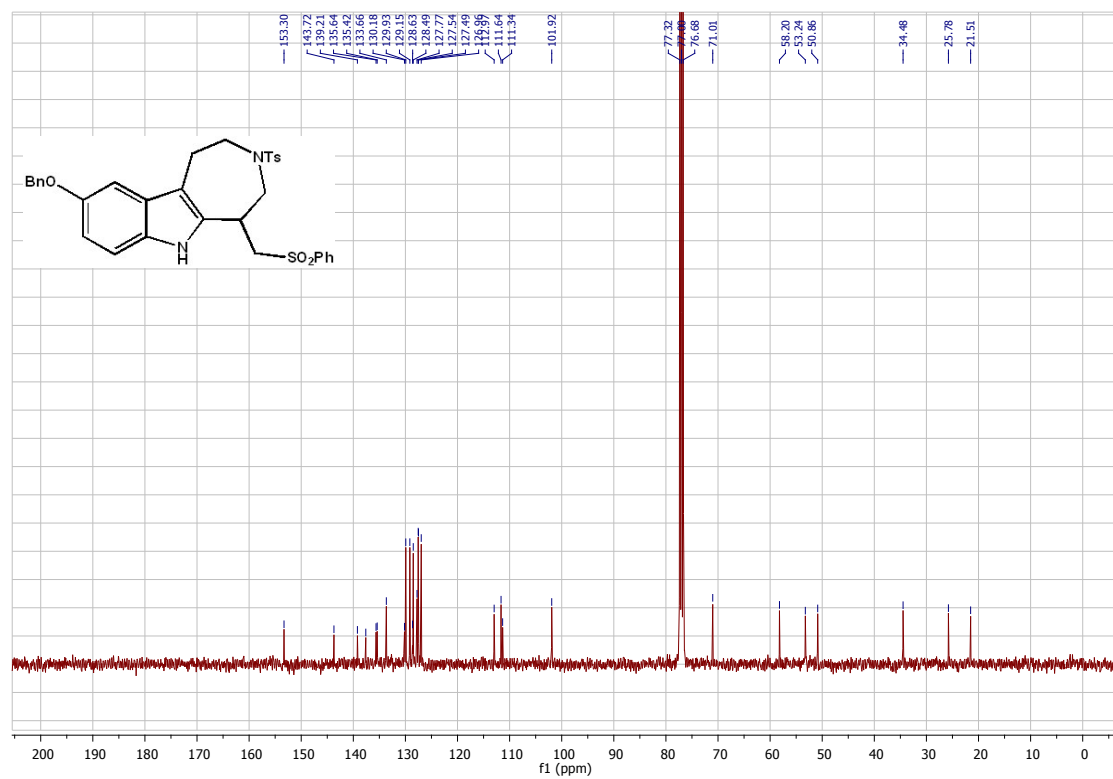

1

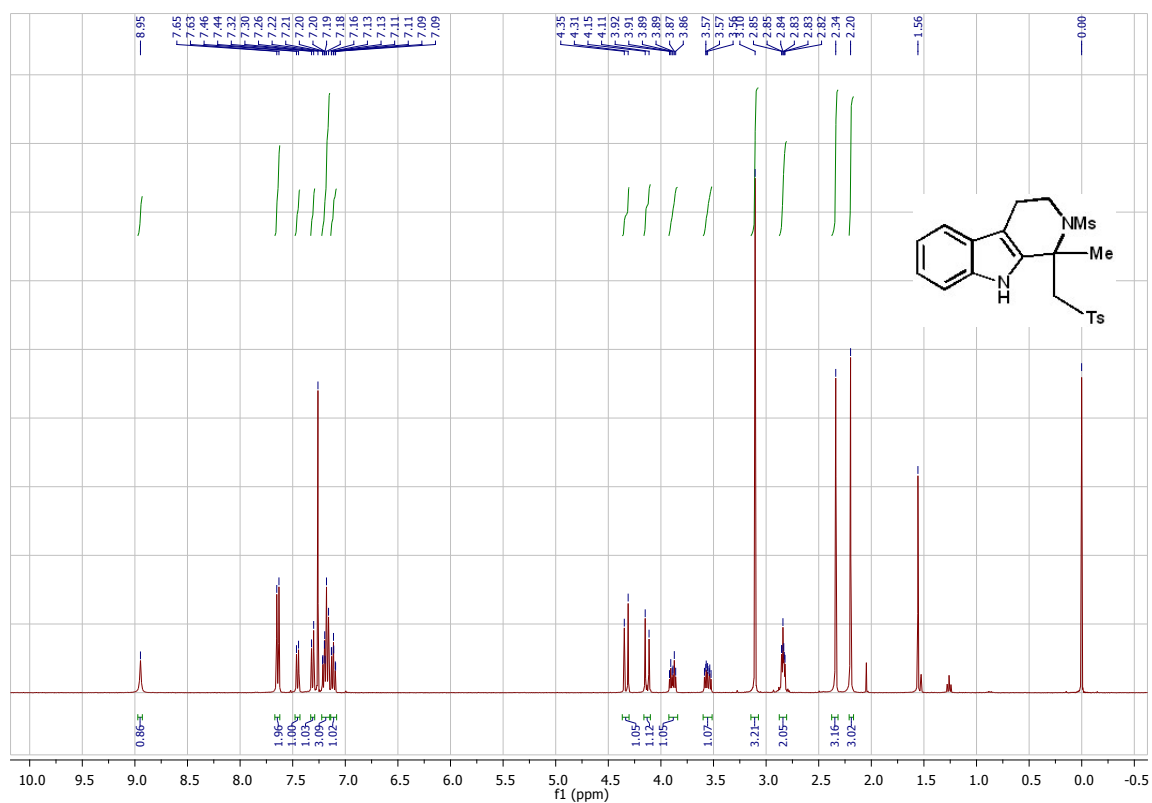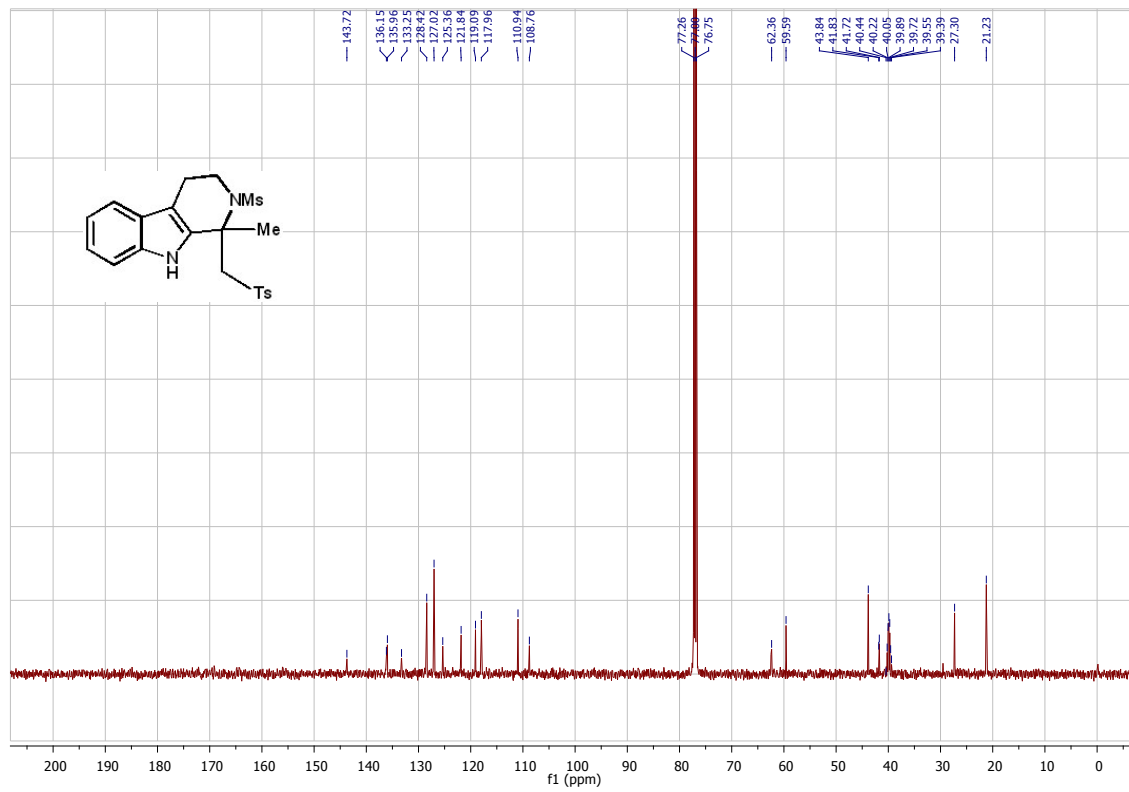

5m

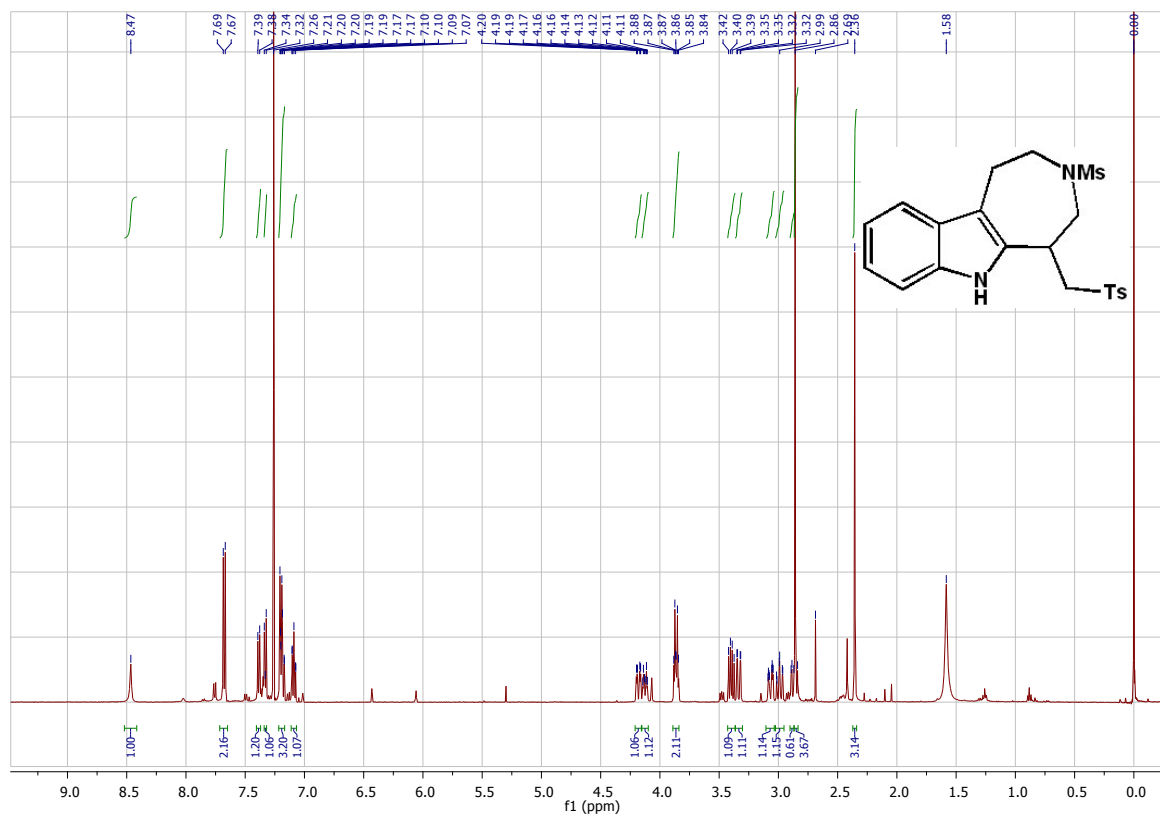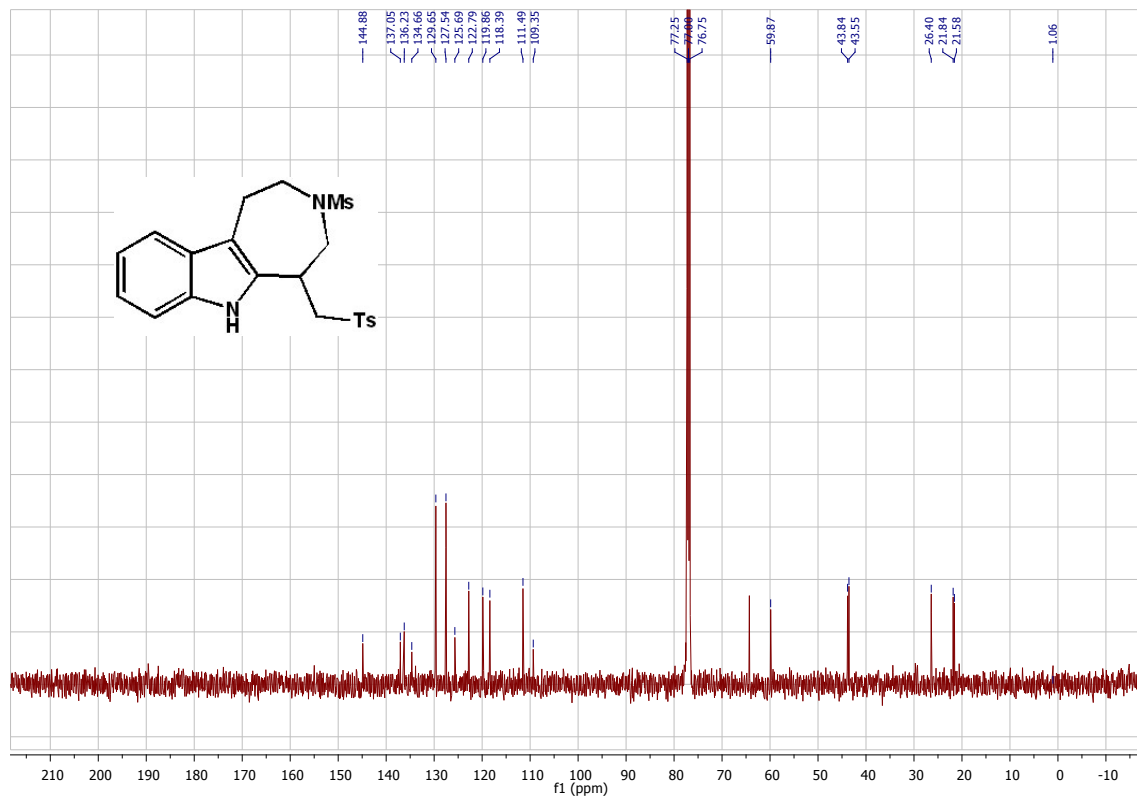

Supplement: d0cc06991d1.pdf [file d0cc06991d1.pdf]
